# Supplementary material for: A genome-wide identification and analysis of the DYW-deaminase genes in the pentatricopeptide repeat gene family in cotton (Gossypium spp.)
Source: PLoS One. 2017 Mar 24;12(3):e0174201. doi: 10.1371/journal.pone.0174201 (PMC5365158; doi:10.1371/journal.pone.0174201)
Supplement: S1 Table — (XLSX) [file pone.0174201.s005.xlsx]

## Sheet: Sheet1
gene_id	A_fpkm	R_fpkm	pvalue	FDR	log2FC(R/A)	log2FC(A/R)	Qeury_length	NR_tophit_name	NR_tophit_description	NR_topHSP_%-Simil	Swissprot_tophit_name	Swissprot_tophit_description	Swissprot_tophsp_%-Simil	GOs	String_tophit_name	String_tophit_description	String_topHSP_%-Simil	COG	KOG	NOG	KO/Gene_ID	KEGG_GENE_NAME
Gh_D11G0852	3.75404	1.1916	5e-05	0.00199199	-1.65554	1.65554	637	gi|559783633|gb|AHB18411.1|	pentatricopeptide repeat-containing protein [Gossypium hirsutum]	0.99	gi|218546767|sp|O22137.2|PP202_ARATH	RecName: Full=Pentatricopeptide repeat-containing protein At2g45350, chloroplastic; AltName: Full=Protein CHLORORESPIRATORY REDUCTION 4; Flags: Precursor [Arabido	0.79	_	3694.eugene3.00140145	hypothetical protein	0.8465	_	KOG4197	_	None	_
Gh_A02G1102	1.63713	0.645981	0.00105	0.0226083	-1.34161	1.34161	700	gi|590599782|ref|XP_007019278.1|	Tetratricopeptide repeat (TPR)-like superfamily protein, putative [Theobroma cacao]	0.9	gi|75273843|sp|Q9LRV2.1|PP256_ARATH	RecName: Full=Pentatricopeptide repeat-containing protein At3g26540 [Arabidopsis thaliana]	0.76	_	29760.GSVIVG00014353001	SubName: Full=Chromosome chr18 scaffold_1, whole genome shotgun sequence;	0.8175	_	KOG4197	_	None	_
Gh_A11G0734	2.1276	0.948253	0.0014	0.0279147	-1.16588	1.16588	637	gi|559783633|gb|AHB18411.1|	pentatricopeptide repeat-containing protein [Gossypium hirsutum]	1	gi|218546767|sp|O22137.2|PP202_ARATH	RecName: Full=Pentatricopeptide repeat-containing protein At2g45350, chloroplastic; AltName: Full=Protein CHLORORESPIRATORY REDUCTION 4; Flags: Precursor [Arabido	0.79	_	3694.eugene3.00140145	hypothetical protein	0.8415	_	KOG4197	_	None	_
Gh_D06G0610	1.62514	3.56964	5e-05	0.00199199	1.13521	-1.13521	613	gi|590577144|ref|XP_007013155.1|	Pentatricopeptide repeat-containing protein isoform 1 [Theobroma cacao]	0.92	gi|75160582|sp|Q8S9D1.1|PP395_ARATH	RecName: Full=Pentatricopeptide repeat-containing protein At5g21222; AltName: Full=SNF1-like protein kinase AtC401 [Arabidopsis thaliana]	0.84	_	29760.GSVIVG00016733001	SubName: Full=Chromosome chr11 scaffold_13, whole genome shotgun sequence;	0.882	_	KOG4197	_	K17710	PTCD1
Gh_A06G0542	1.2895	3.32768	5e-05	0.00199199	1.3677	-1.3677	613	gi|590577144|ref|XP_007013155.1|	Pentatricopeptide repeat-containing protein isoform 1 [Theobroma cacao]	0.92	gi|75160582|sp|Q8S9D1.1|PP395_ARATH	RecName: Full=Pentatricopeptide repeat-containing protein At5g21222; AltName: Full=SNF1-like protein kinase AtC401 [Arabidopsis thaliana]	0.82	_	29760.GSVIVG00016733001	SubName: Full=Chromosome chr11 scaffold_13, whole genome shotgun sequence;	0.88	_	KOG4197	_	K17710	PTCD1
Gh_D05G3392	1.27584	3.52277	5e-05	0.00199199	1.46526	-1.46526	532	gi|354726093|emb|CCD31439.1|	RNA processing factor 3 [Arabidopsis thaliana]	0.65	gi|193806495|sp|Q9LQ14.2|PPR96_ARATH	RecName: Full=Pentatricopeptide repeat-containing protein At1g62930, chloroplastic; Flags: Precursor [Arabidopsis thaliana]	0.64	_	_	_	_	_	_	_	None	_
Gh_D05G1942	29.1677	0.639326	0.00075	0.0176045	-5.51168	5.51168	180	gi|590592252|ref|XP_007017228.1|	Cold regulated gene 27, putative isoform 1 [Theobroma cacao]	0.84	_	_	_	_	_	_	_	_	_	_	None	_
Gh_Sca135652G01	15.5411	0	0.00025	0.00757223	-3.95802	3.95802	57	_	_	_	_	_	_	_	_	_	_	_	_	_	None	_
Gh_D03G1135	43.0101	3.62601	5e-05	0.00199199	-3.56822	3.56822	165	gi|590588452|ref|XP_007016203.1|	Maternal effect embryo arrest 59 [Theobroma cacao]	0.88	_	_	_	_	29760.GSVIVG00024173001	SubName: Full=Chromosome chr6 scaffold_3, whole genome shotgun sequence;	0.8182	_	_	NOG258876;NOG254504	None	_
Gh_A11G2882	17.9485	1.63297	5e-05	0.00199199	-3.45829	3.45829	251	gi|300793602|tpg|DAA33867.1|	TPA_inf: aquaporin TIP1;4 [Gossypium hirsutum]	1	gi|135860|sp|P25818.1|TIP11_ARATH	RecName: Full=Aquaporin TIP1-1; AltName: Full=Aquaporin TIP; AltName: Full=Gamma-tonoplast intrinsic protein; Short=Gamma-TIP; AltName: Full=Tonoplast intrinsic prot	0.92	GO:0006810;GO:0016021;GO:0005215	29760.GSVIVG00000605001	SubName: Full=Chromosome chr8 scaffold_106, whole genome shotgun sequence;	0.9368	COG0580	KOG0223	_	K09873	TIP
Gh_D11G3155	0.990784	0	0.00165	0.0314576	-3.30857	3.30857	122	gi|590569137|ref|XP_007010986.1|	Disease resistance protein RPS2 [Theobroma cacao]	0.66	_	_	_	_	_	_	_	_	_	_	None	_
Gh_A12G1163	0.911147	0	0.00235	0.0406241	-3.18768	3.18768	120	gi|590719408|ref|XP_007051045.1|	GATA transcription factor 15 [Theobroma cacao]	0.76	gi|71660789|sp|Q8LG10.2|GAT15_ARATH	RecName: Full=GATA transcription factor 15 [Arabidopsis thaliana]	0.61	GO:0005488	_	_	_	_	_	_	None	_	sequence-specific DNA binding（Zinc finger）
Gh_D06G0147	5.0351	0.572539	5e-05	0.00199199	-3.13657	3.13657	279	gi|590592252|ref|XP_007017228.1|	Cold regulated gene 27, putative isoform 1 [Theobroma cacao]	0.8	_	_	_	_	_	_	_	_	_	_	None	_
Gh_A11G0589	8.75578	0	5e-05	0.00199199	-3.13024	3.13024	143	gi|573017166|gb|AHF72745.1|	cold-circadian (cold circadian rhythm-RNA binding)-like protein [Gossypium hirsutum]	1	gi|417260|sp|Q03200.1|LIRP1_ORYSJ	RecName: Full=Light-regulated protein; Flags: Precursor [Oryza sativa Japonica Group]	0.63	GO:0009507;GO:0030003;GO:0070838	3694.estExt_fgenesh4_pm.C_LG_I0202	hypothetical protein	0.8065	_	_	NOG278951	None	_
Gh_A03G1059	20.9895	2.72439	5e-05	0.00199199	-2.94566	2.94566	172	gi|590696272|ref|XP_007045120.1|	Chaperone DnaJ-domain superfamily protein, putative [Theobroma cacao]	0.87	gi|18203398|sp|Q9QYI7.1|DNJB8_MOUSE	RecName: Full=DnaJ homolog subfamily B member 8; AltName: Full=mDj6 [Mus musculus]	0.75	GO:0009644;GO:0006457;GO:0005634;GO:0009408;GO:0042542;GO:0005737	29760.GSVIVG00030478001	SubName: Full=Chromosome chr1 scaffold_5, whole genome shotgun sequence;	0.914	COG0484	KOG0714	_	None	_
Gh_D02G1469	11.1234	1.59481	0.0001	0.00360715	-2.80214	2.80214	173	gi|590696272|ref|XP_007045120.1|	Chaperone DnaJ-domain superfamily protein, putative [Theobroma cacao]	0.87	gi|18203398|sp|Q9QYI7.1|DNJB8_MOUSE	RecName: Full=DnaJ homolog subfamily B member 8; AltName: Full=mDj6 [Mus musculus]	0.75	GO:0009644;GO:0006457;GO:0005634;GO:0009408;GO:0042542;GO:0005737	29760.GSVIVG00030478001	SubName: Full=Chromosome chr1 scaffold_5, whole genome shotgun sequence;	0.914	COG0484	KOG0714	_	None	_
Gh_A06G0536	2.22879	0.341846	0.00175	0.0328852	-2.70484	2.70484	340	gi|590577254|ref|XP_007013185.1|	Heat shock transcription factor C1, putative [Theobroma cacao]	0.88	gi|75311616|sp|Q9LV52.1|HSFC1_ARATH	RecName: Full=Heat stress transcription factor C-1; Short=AtHsfC1; AltName: Full=AtHsf-08 [Arabidopsis thaliana]	0.81	GO:0005634;GO:0006355;GO:0009408;GO:0009407;GO:0005667;GO:0043565;GO:0003700;GO:0045449	29760.GSVIVG00016746001	SubName: Full=Putative uncharacterized protein (Chromosome chr11 scaffold_13, whole genome s [...]	0.8324	COG5169	KOG0627	_	K09419	HSFF
Gh_Sca004965G01	1.26319	0.194203	0.00015	0.00504383	-2.70143	2.70143	949	gi|590596233|ref|XP_007018281.1|	E3 ubiquitin-protein ligase UPL2 isoform 1 [Theobroma cacao]	0.95	gi|172045749|sp|Q8GY23.3|UPL1_ARATH	RecName: Full=E3 ubiquitin-protein ligase UPL1; Short=Ubiquitin-protein ligase 1 [Arabidopsis thaliana]	0.58	GO:0016567;GO:0004842;GO:0016874	4558.Sb08g012560.1	hypothetical protein	0.8235	COG5021	_	_	K10592	HUWE1, MULE, ARF-BP1
Gh_A03G0405	80.3534	13.3958	5e-05	0.00199199	-2.58458	2.58458	165	gi|590588452|ref|XP_007016203.1|	Maternal effect embryo arrest 59 [Theobroma cacao]	0.87	_	_	_	_	29760.GSVIVG00024173001	SubName: Full=Chromosome chr6 scaffold_3, whole genome shotgun sequence;	0.8061	_	_	NOG258876;NOG254504	None	_
Gh_D03G1171	2.9772	0.553727	0.0001	0.00360715	-2.42671	2.42671	392	gi|590589081|ref|XP_007016351.1|	Homeodomain-like superfamily protein, putative isoform 1 [Theobroma cacao]	0.83	gi|75337463|sp|Q9SNB4.1|PCL1_ARATH	RecName: Full=Transcription factor LUX; AltName: Full=Protein LUX ARRHYTHMO; AltName: Full=Protein PHYTOCLOCK 1 [Arabidopsis thaliana]	0.71	GO:0003677;GO:0000785;GO:0003682	29760.GSVIVG00024277001	SubName: Full=Chromosome chr6 scaffold_3, whole genome shotgun sequence;	0.7938	_	KOG1601	_	None	_
Gh_D05G1605	8.72361	1.63284	5e-05	0.00199199	-2.41754	2.41754	355	gi|590625828|ref|XP_007025992.1|	Thiazole biosynthetic enzyme [Theobroma cacao]	0.96	gi|378524328|sp|F6H7K5.1|THI42_VITVI	RecName: Full=Thiamine thiazole synthase 2, chloroplastic; AltName: Full=Thiazole biosynthetic enzyme 2; Flags: Precursor [Vitis vinifera]	0.95	GO:0009228;GO:0046872;GO:0005829;GO:0052837;GO:0006950;GO:0009570	29760.GSVIVG00006912001	SubName: Full=Chromosome chr10 scaffold_179, whole genome shotgun sequence;	0.9659	COG1635	KOG2960	_	K03146	thi1
Gh_Sca004965G02	3.04476	0.576041	5e-05	0.00199199	-2.40209	2.40209	694	gi|590596233|ref|XP_007018281.1|	E3 ubiquitin-protein ligase UPL2 isoform 1 [Theobroma cacao]	0.95	gi|332278235|sp|Q8H0T4.3|UPL2_ARATH	RecName: Full=E3 ubiquitin-protein ligase UPL2; Short=Ubiquitin-protein ligase 2 [Arabidopsis thaliana]	0.55	GO:0016567;GO:0004842;GO:0016874	_	_	_	_	_	_	K10592	HUWE1, MULE, ARF-BP1
Gh_A05G1432	7.19617	1.45544	5e-05	0.00199199	-2.30577	2.30577	355	gi|590625828|ref|XP_007025992.1|	Thiazole biosynthetic enzyme [Theobroma cacao]	0.96	gi|378524328|sp|F6H7K5.1|THI42_VITVI	RecName: Full=Thiamine thiazole synthase 2, chloroplastic; AltName: Full=Thiazole biosynthetic enzyme 2; Flags: Precursor [Vitis vinifera]	0.94	GO:0009228;GO:0046872;GO:0005829;GO:0052837;GO:0006950;GO:0009570	29760.GSVIVG00006912001	SubName: Full=Chromosome chr10 scaffold_179, whole genome shotgun sequence;	0.9625	COG1635	KOG2960	_	K03146	thi1
Gh_D07G0984	5.28799	1.10236	5e-05	0.00199199	-2.26212	2.26212	338	gi|590589081|ref|XP_007016351.1|	Homeodomain-like superfamily protein, putative isoform 1 [Theobroma cacao]	0.84	gi|75337463|sp|Q9SNB4.1|PCL1_ARATH	RecName: Full=Transcription factor LUX; AltName: Full=Protein LUX ARRHYTHMO; AltName: Full=Protein PHYTOCLOCK 1 [Arabidopsis thaliana]	0.8	GO:0003677;GO:0000785;GO:0003682	29760.GSVIVG00024277001	SubName: Full=Chromosome chr6 scaffold_3, whole genome shotgun sequence;	0.9278	_	KOG1601	_	None	_
Gh_D03G1125	8.20808	1.71714	5e-05	0.00199199	-2.25704	2.25704	484	gi|590588272|ref|XP_007016165.1|	ThiaminC isoform 4 [Theobroma ThiaminC isoform 4 [Theobroma cacao]	0.99	gi|75220243|sp|O82392.1|THIC_ARATH	RecName: Full=Phosphomethylpyrimidine synthase, chloroplastic; AltName: Full=Hydroxymethylpyrimidine phosphate synthase; Short=HMP-P synthase; Short=HMP-phosphate s	0.97	GO:0080041;GO:0000023;GO:0019760;GO:0019288;GO:0051536;GO:0019252;GO:0009228;GO:0006098;GO:0043085	3694.gw1.I.990.1	HMP-P synthase	0.9873	COG0422	_	_	K03147	thiC
Gh_A06G1853	7.08923	1.49831	5e-05	0.00199199	-2.24229	2.24229	207	gi|590592252|ref|XP_007017228.1|	Cold regulated gene 27, putative isoform 1 [Theobroma cacao]	0.82	_	_	_	_	_	_	_	_	_	_	None	_
Gh_A08G1554	2.00384	0.44244	0.00075	0.0176045	-2.17921	2.17921	496	gi|590677122|ref|XP_007039931.1|	Beta vacuolar processing enzyme [Theobroma cacao]	0.9	gi|1351409|sp|P49042.1|VPE_RICCO	RecName: Full=Vacuolar-processing enzyme; Short=VPE; Flags: Precursor [Ricinus communis]	0.87	GO:0008233;GO:0006624;GO:0005773	3694.gw1.127.139.1	annotation not avaliable	0.9531	COG5206	KOG1348	_	K01369	LGMN
Gh_A12G1407	8.30278	1.90564	5e-05	0.00199199	-2.12332	2.12332	627	gi|590696865|ref|XP_007045281.1|	Flavin-binding, kelch repeat, f box 1 isoform 1 [Theobroma cacao]	0.94	gi|75169796|sp|Q9C9W9.1|ADO3_ARATH	RecName: Full=Adagio protein 3; AltName: Full=F-box only protein 2a; Short=FBX2a; AltName: Full=Flavin-binding kelch repeat F-box protein 1 [Arabidopsis thaliana]	0.89	GO:0007623;GO:0007165;GO:0009637;GO:0006355;GO:0004871;GO:0009911;GO:0001047	3694.eugene3.00081267	hypothetical protein	0.9606	COG2202	KOG0379	_	K12116	FKF1
Gh_D05G1429	8.00732	1.8774	5e-05	0.00199199	-2.09258	2.09258	265	gi|590622782|ref|XP_007025143.1|	Chlorophyll a-b binding protein, chloroplastic [Theobroma cacao]	0.98	gi|115792|sp|P27493.1|CB22_TOBAC	RecName: Full=Chlorophyll a-b binding protein 21, chloroplastic; AltName: Full=LHCII type I CAB-21; Short=LHCP; Flags: Precursor	0.96	GO:0009523;GO:0018298;GO:0046872;GO:0009765;GO:0016021;GO:0016168;GO:0009507;GO:0009522	29760.GSVIVG00003412001	SubName: Full=Putative uncharacterized protein (Chromosome undetermined scaffold_143, whole [...]	0.9697	_	_	NOG220557	K08912	LHCB1
Gh_A02G0866	29.3402	7.74493	5e-05	0.00199199	-1.92155	1.92155	246	gi|590580805|ref|XP_007014172.1|	Xyloglucan endotransglucosylase/hydrolase family protein [Theobroma cacao]	0.93	gi|38605152|sp|Q38910.1|XTH23_ARATH	RecName: Full=Probable xyloglucan endotransglucosylase/hydrolase protein 23; Short=At-XTH23; Short=XTH-23; Flags: Precursor [Arabidopsis thaliana]	0.86	GO:0048046;GO:0004553;GO:0016762;GO:0005618;GO:0006073;GO:0071555	29760.GSVIVG00031398001	SubName: Full=Chromosome chr11 scaffold_56, whole genome shotgun sequence;	0.9554	COG2273	_	_	K14504	TCH4
Gh_A03G2087	2.11764	0.57008	0.00125	0.0256779	-1.89322	1.89322	391	gi|590589081|ref|XP_007016351.1|	Homeodomain-like superfamily protein, putative isoform 1 [Theobroma cacao]	0.81	gi|75337463|sp|Q9SNB4.1|PCL1_ARATH	RecName: Full=Transcription factor LUX; AltName: Full=Protein LUX ARRHYTHMO; AltName: Full=Protein PHYTOCLOCK 1 [Arabidopsis thaliana]	0.69	GO:0003677;GO:0000785;GO:0003682	29760.GSVIVG00024277001	SubName: Full=Chromosome chr6 scaffold_3, whole genome shotgun sequence;	0.8041	_	KOG1601	_	None	_
Gh_A05G0527	2.57868	0.696752	5e-05	0.00199199	-1.88792	1.88792	1681	gi|590571513|ref|XP_007011616.1|	Centromere-associated protein E, putative isoform 1 [Theobroma cacao]	0.82	_	_	_	_	_	_	_	_	_	_	None	_
Gh_A03G0420	18.658	5.07218	5e-05	0.00199199	-1.87912	1.87912	476	gi|590588272|ref|XP_007016165.1|	ThiaminC isoform 4 [Theobroma ThiaminC isoform 4 [Theobroma cacao]	0.99	gi|75220243|sp|O82392.1|THIC_ARATH	RecName: Full=Phosphomethylpyrimidine synthase, chloroplastic; AltName: Full=Hydroxymethylpyrimidine phosphate synthase; Short=HMP-P synthase; Short=HMP-phosphate s	0.97	GO:0080041;GO:0000023;GO:0019760;GO:0019288;GO:0051536;GO:0019252;GO:0009228;GO:0006098;GO:0043085	3694.gw1.IX.3861.1	HMP-P synthase	0.987	COG0422	_	_	K03147	thiC
Gh_Sca047584G01	93.2606	25.7718	5e-05	0.00199199	-1.85547	1.85547	90	gi|590644520|ref|XP_007031104.1|	Heat shock protein binding protein, putative [Theobroma cacao]	0.91	gi|82186476|sp|Q6P642.1|DNJB6_XENTR	RecName: Full=DnaJ homolog subfamily B member 6	0.73	_	3694.estExt_fgenesh4_pm.C_1330037	hypothetical protein	0.9186	COG0484	KOG0714	_	None	_
Gh_D08G0688	3.12889	0.889048	5e-05	0.00199199	-1.81532	1.81532	522	gi|567903030|ref|XP_006444003.1|	hypothetical protein CICLE_v10018459mg [Citrus clementina]	0.82	_	_	_	GO:0016310;GO:0016301	29760.GSVIVG00023767001	SubName: Full=Chromosome chr7 scaffold_31, whole genome shotgun sequence;	0.7819	_	_	NOG283184	None	_
Gh_A11G2604	3.64789	1.05228	5e-05	0.00199199	-1.79354	1.79354	1017	gi|590610863|ref|XP_007021940.1|	Leucine-rich repeat transmembrane protein kinase, putative isoform 1 [Theobroma cacao]	0.81	gi|313471762|sp|C0LGN2.1|Y3148_ARATH	RecName: Full=Probable leucine-rich repeat receptor-like serine/threonine-protein kinase At3g14840; Flags: Precursor [Arabidopsis thaliana]	0.7	GO:0005524;GO:0004672;GO:0016021;GO:0006468	29760.GSVIVG00027899001	SubName: Full=Chromosome chr19 scaffold_4, whole genome shotgun sequence;	0.9227	COG0515	KOG1187	_	None	_
Gh_D05G3054	7.71125	2.22796	0.0021	0.037429	-1.79124	1.79124	143	gi|590708386|ref|XP_007048262.1|	Autophagy-related protein 13 [Theobroma cacao]	0.82	_	_	_	_	_	_	_	_	_	_	K08331	ATG13
Gh_Sca005105G01	2.91115	0.842278	0.0007	0.0167282	-1.78922	1.78922	353	gi|590681098|ref|XP_007041017.1|	Zinc transporter 1 precursor [Theobroma cacao]	0.88	gi|37090176|sp|O81123.1|ZIP1_ARATH	RecName: Full=Zinc transporter 1; AltName: Full=ZRT/IRT-like protein 1; Flags: Precursor [Arabidopsis thaliana]	0.73	GO:0032440;GO:0006833;GO:0010106;GO:0055114;GO:0005385;GO:0006863;GO:0006826;GO:0001708;GO:0016021;GO:0071577	29760.GSVIVG00037538001	SubName: Full=Chromosome undetermined scaffold_89, whole genome shotgun sequence;	0.8026	_	KOG1558	_	K14709	SLC39A1_2_3, ZIP1_2_3
Gh_Sca100043G01	3.32486	0	0.00025	0.00757223	-1.73329	1.73329	84	gi|590587010|ref|XP_007015859.1|	Histone chaperone HIRA isoform 1 [Theobroma cacao]	1	gi|75322277|sp|Q652L2.1|HIRA_ORYSJ	RecName: Full=Protein HIRA; AltName: Full=Histone regulator protein [Oryza sativa Japonica Group]	0.98	GO:0005634;GO:0006355	_	_	_	_	_	_	K11293	HIRA, HIR1
Gh_Sca013634G01	12.633	3.87279	5e-05	0.00199199	-1.70575	1.70575	558	gi|590674570|ref|XP_007039206.1|	Pseudo-response regulator 5, putative isoform 2 [Theobroma cacao]	0.87	gi|52783225|sp|Q6LA42.2|APRR5_ARATH	RecName: Full=Two-component response regulator-like APRR5; AltName: Full=Pseudo-response regulator 5 [Arabidopsis thaliana]	0.74	GO:0000160;GO:0005622	3694.eugene3.00150024	response regulator	0.8198	_	KOG1601	_	K12130	PRR5
Gh_A01G0875	3.20861	0.991494	5e-05	0.00199199	-1.69427	1.69427	734	gi|590594768|ref|XP_007017944.1|	Prolyl oligopeptidase family protein [Theobroma cacao]	0.93	gi|13633250|sp|Q9QUR6.1|PPCE_MOUSE	RecName: Full=Prolyl endopeptidase; Short=PE; AltName: Full=Post-proline cleaving enzyme [Mus musculus]	0.72	GO:0004252;GO:0006508;GO:0070008	3694.estExt_fgenesh4_pg.C_LG_II0126	hypothetical protein	0.8911	COG1505	KOG2237	_	K01322	E3.4.21.26, PREP
Gh_A11G2469	239.053	73.996	5e-05	0.00199199	-1.69181	1.69181	158	gi|590644520|ref|XP_007031104.1|	Heat shock protein binding protein, putative [Theobroma cacao]	0.94	gi|62899940|sp|Q607A6.1|DNAJ_METCA	RecName: Full=Chaperone protein DnaJ [Methylococcus capsulatus str. Bath]	0.73	_	3694.estExt_fgenesh4_pm.C_1330037	hypothetical protein	0.9783	COG0484	KOG0714	_	None	_
Gh_Sca117933G01	18.9803	6.04219	0.0007	0.0167282	-1.65136	1.65136	104	gi|590658854|ref|XP_007034968.1|	Ankyrin repeat family protein, putative [Theobroma cacao]	0.6	_	_	_	_	_	_	_	_	_	_	None	_
Gh_Sca044884G01	10.3662	3.36035	0.00275	0.0453998	-1.6252	1.6252	124	gi|590663161|ref|XP_007036133.1|	BAH domain,TFIIS helical bundle-like domain isoform 1 [Theobroma cacao]	0.98	_	_	_	GO:0005634;GO:0003677;GO:0000785;GO:0003682;GO:0006351	3694.grail3.0005007501	hypothetical protein	0.9573	_	KOG1886	_	None	_
Gh_D10G1650	4.85059	1.57618	5e-05	0.00199199	-1.62173	1.62173	2237	gi|590660645|ref|XP_007035454.1|	P-loop containing nucleoside triphosphate hydrolases superfamily protein isoform 1 [Theobroma P-loop containing nucleoside triphosp	0.9	gi|476007157|sp|F4IHS2.1|SYD_ARATH	RecName: Full=Chromatin structure-remodeling complex protein SYD; AltName: Full=ATP-dependent helicase SYD; AltName: Full=Chromatin remodeling complex subunit R 3;	0.86	GO:0042393;GO:0003677;GO:0005524;GO:0009616;GO:0009909;GO:0016567;GO:0050826;GO:0009640;GO:0010228;GO:0010267;GO:0010182;GO:0000911;GO:0003682;GO:0005829;GO:0043044;GO:2000022;GO:0016887;GO:0006342;GO:0000226;GO:0035196;GO:0000785;GO:0007267;GO:0009845;GO:0010199;GO:0010104;GO:0006306;GO:0009933;GO:0019915;GO:0010162;GO:1900150;GO:0009793	3702.AT2G28290.1-P	SYD (SPLAYED); ATPase/ chromatin binding; Encodes a SWI2/SNF2-like protein in the SNF2 subcl [...]	0.9192	COG0553	KOG0386	_	None	_
Gh_D05G3335	20.2457	6.62497	5e-05	0.00199199	-1.61163	1.61163	751	gi|590635969|ref|XP_007028756.1|	Cc-nbs-lrr resistance protein, putative [Theobroma cacao]	0.63	gi|46396029|sp|Q9T048.1|DRL27_ARATH	RecName: Full=Disease resistance protein At4g27190 [Arabidopsis thaliana]	0.6	_	_	_	_	_	_	_	None	_
Gh_D02G1348	6.10982	2.01552	0.00095	0.0210029	-1.59998	1.59998	196	gi|590697991|ref|XP_007045593.1|	Uncharacterized protein isoform 3 [Theobroma cacao]	0.81	_	_	_	_	29760.GSVIVG00021185001	SubName: Full=Chromosome chr1 scaffold_22, whole genome shotgun sequence;	0.7533	_	_	NOG228014	None	_
Gh_D12G1525	13.0786	4.3186	5e-05	0.00199199	-1.59857	1.59857	627	gi|590696865|ref|XP_007045281.1|	Flavin-binding, kelch repeat, f box 1 isoform 1 [Theobroma cacao]	0.94	gi|75169796|sp|Q9C9W9.1|ADO3_ARATH	RecName: Full=Adagio protein 3; AltName: Full=F-box only protein 2a; Short=FBX2a; AltName: Full=Flavin-binding kelch repeat F-box protein 1 [Arabidopsis thaliana]	0.89	GO:0007623;GO:0007165;GO:0009637;GO:0006355;GO:0004871;GO:0009911;GO:0001047	3694.eugene3.00081267	hypothetical protein	0.9576	COG2202	KOG0379	_	K12116	FKF1
Gh_D11G2924	1.51223	0.501103	0.00085	0.0193303	-1.5935	1.5935	633	gi|566238875|ref|XP_006371391.1|	hypothetical protein POPTR_0019s09760g [Populus trichocarpa]	0.7	gi|75097884|sp|O23530.3|SNC1_ARATH	RecName: Full=Protein SUPPRESSOR OF npr1-1, CONSTITUTIVE 1; Short=AtSNC1; AltName: Full=Disease resistance RPP5-like protein [Arabidopsis thaliana]	0.54	_	3694.eugene3.01250003	tir-nbs-lrr resistance protein	0.7714	_	KOG0619	_	None	_
Gh_D02G0690	36.7656	12.2462	5e-05	0.00199199	-1.58602	1.58602	1155	gi|643728527|gb|KDP36552.1|	hypothetical protein JCGZ_08319 [Jatropha curcas]	0.89	gi|17433083|sp|Q9SQI2.2|GIGAN_ARATH	RecName: Full=Protein GIGANTEA [Arabidopsis thaliana]	0.86	_	3694.estExt_fgenesh4_pg.C_LG_V1131	hypothetical protein	0.8909	_	_	NOG263125	K12124	GI
Gh_D01G1342	9.31668	3.11942	0.0027	0.0447984	-1.57854	1.57854	132	gi|383932358|gb|AFH57276.1|	lipid transfer protein [Gossypium hirsutum]	0.94	_	_	_	GO:0009506	3694.eugene3.00100938	hypothetical protein	0.8972	_	_	NOG286748	None	_
Gh_D12G0890	2.81427	0.947769	5e-05	0.00199199	-1.57015	1.57015	2228	gi|590708024|ref|XP_007048161.1|	Uncharacterized protein isoform 1 [Theobroma cacao]	0.89	_	_	_	_	_	_	_	_	_	_	None	_
Gh_D06G1610	86.7098	29.8672	5e-05	0.00199199	-1.53763	1.53763	397	gi|590625892|ref|XP_007026011.1|	Glucose-6-phosphate/phosphate translocator 2 [Theobroma cacao]	0.94	gi|325511333|sp|Q94B38.2|GPT2_ARATH	RecName: Full=Glucose-6-phosphate/phosphate translocator 2, chloroplastic; Flags: Precursor [Arabidopsis thaliana]	0.95	GO:0006810;GO:0016021;GO:0005215	3694.gw1.IV.1792.1	hypothetical protein	0.8898	_	KOG1441	_	K15283	SLC35E1
Gh_D05G1161	30.2875	10.6091	5e-05	0.00199199	-1.51342	1.51342	1135	gi|590615777|ref|XP_007023319.1|	TOPLESS-related 1 isoform 1 [Theobroma cacao]	0.97	gi|75332047|sp|Q94AI7.1|TPL_ARATH	RecName: Full=Protein TOPLESS; AltName: Full=WUS-interacting protein 1 [Arabidopsis thaliana]	0.92	GO:0006355	3702.AT1G15750.1-P	TPL (TOPLESS); protein binding / protein homodimerization/ transcription repressor; Encodes [...]	0.9626	COG2319	KOG0266	_	None	_
Gh_A06G1287	85.8657	30.1312	5e-05	0.00199199	-1.51082	1.51082	398	gi|590625892|ref|XP_007026011.1|	Glucose-6-phosphate/phosphate translocator 2 [Theobroma cacao]	0.92	gi|325511333|sp|Q94B38.2|GPT2_ARATH	RecName: Full=Glucose-6-phosphate/phosphate translocator 2, chloroplastic; Flags: Precursor [Arabidopsis thaliana]	0.94	GO:0006810;GO:0016021;GO:0005215	3694.gw1.IV.1792.1	hypothetical protein	0.8705	_	KOG1441	_	K15283	SLC35E1
Gh_A10G1536	11.8265	4.18749	5e-05	0.00199199	-1.49787	1.49787	775	gi|590661939|ref|XP_007035811.1|	PAS domain-containing protein tyrosine kinase family protein [Theobroma cacao]	0.85	gi|75334172|sp|Q9FPR3.1|EDR1_ARATH	RecName: Full=Serine/threonine-protein kinase EDR1; AltName: Full=MAPKK kinase EDR1; AltName: Full=Protein ENHANCED DISEASE RESISTANCE 1; Short=AtEDR1; AltName: Ful	0.68	GO:0007165;GO:0005524;GO:0004672;GO:0006468;GO:0004871	3694.eugene3.00101399	hypothetical protein	0.8174	COG0515	KOG0192	_	None	_
Gh_D08G2193	170.18	60.263	5e-05	0.00199199	-1.49772	1.49772	151	gi|590644520|ref|XP_007031104.1|	Heat shock protein binding protein, putative [Theobroma cacao]	0.89	gi|82186476|sp|Q6P642.1|DNJB6_XENTR	RecName: Full=DnaJ homolog subfamily B member 6	0.73	_	3694.estExt_fgenesh4_pm.C_1330037	hypothetical protein	0.9239	COG0484	KOG0714	_	None	_
Gh_A01G0934	30.5587	10.9445	5e-05	0.00199199	-1.48138	1.48138	142	gi|643731185|gb|KDP38523.1|	hypothetical protein JCGZ_04448 [Jatropha curcas]	0.72	_	_	_	_	_	_	_	_	_	_	None	_
Gh_D07G0561	3.79733	1.36692	0.00015	0.00504383	-1.47406	1.47406	525	gi|590669444|ref|XP_007037775.1|	Cytochrome P450 71A1 [Theobroma Cytochrome P450 71A1 [Theobroma cacao]	0.79	gi|311033356|sp|P24465.2|C71A1_PERAE	RecName: Full=Cytochrome P450 71A1; AltName: Full=ARP-2; AltName: Full=CYPLXXIA1	0.68	GO:0016705;GO:0020037;GO:0005506;GO:0004497;GO:0055114	_	_	_	_	_	_	None	_
Gh_A01G1778	23.7797	8.58287	5e-05	0.00199199	-1.4702	1.4702	869	gi|590631738|ref|XP_007027647.1|	Starch branching enzyme 2.1 isoform 1 [Theobroma cacao]	0.88	gi|75221107|sp|Q41058.1|GLGB1_PEA	RecName: Full=1,4-alpha-glucan-branching enzyme 1, chloroplastic/amyloplastic; AltName: Full=Starch branching enzyme I; Flags: Precursor [Pisum sativum]	0.89	GO:0043169;GO:0005978;GO:0004553;GO:0005982;GO:0003844;GO:0005985	3694.eugene3.00280310	SubName: Full=Starch branching enzyme II;	0.9456	COG0296	KOG0470	_	K00700	glgB
Gh_D10G1591	8.78678	3.1857	5e-05	0.00199199	-1.46372	1.46372	363	gi|255551523|ref|XP_002516807.1|	ubiquitin-protein ligase, putative [Ricinus communis]	0.62	gi|75151183|sp|Q8GXC7.1|FBK50_ARATH	RecName: Full=F-box/kelch-repeat protein At3g06240 [Arabidopsis thaliana]	0.55	_	_	_	_	_	_	_	None	_
Gh_Sca065452G01	9.38443	3.42395	0.00135	0.0272165	-1.45461	1.45461	155	gi|590644994|ref|XP_007031233.1|	Global transcription factor C isoform 1 [Theobroma cacao]	0.94	gi|75220257|sp|O82491.1|SPT16_ARATH	RecName: Full=FACT complex subunit SPT16; AltName: Full=Facilitates chromatin transcription complex subunit SPT16 [Arabidopsis thaliana]	0.78	_	_	_	_	_	_	_	None	_
Gh_A01G0419	20.4516	7.57706	5e-05	0.00199199	-1.4325	1.4325	310	gi|590609798|ref|XP_007021637.1|	Basic-leucine zipper transcription factor family protein [Theobroma cacao]	0.82	gi|75312317|sp|Q9MA75.1|VIP1_ARATH	RecName: Full=Transcription factor VIP1; AltName: Full=Protein SULPHATE UTILIZATION EFFICIENCY 3; Short=Protein SULFATE UTILIZATION EFFICIENCY 3; AltName: Full=VirE	0.56	GO:0005667;GO:0006355;GO:0043565;GO:0045449;GO:0003700	29760.GSVIVG00027772001	SubName: Full=Chromosome chr19 scaffold_4, whole genome shotgun sequence;	0.7801	_	_	NOG255683	None	_
Gh_D05G0685	10.2199	3.83922	0.00025	0.00757223	-1.4125	1.4125	232	gi|590588104|ref|XP_007016125.1|	Glycosyltransferase, putative [Theobroma cacao]	0.73	gi|75279076|sp|O82383.1|U71D1_ARATH	RecName: Full=UDP-glycosyltransferase 71D1; AltName: Full=Flavonol 3-O-glucosyltransferase UGT71D1 [Arabidopsis thaliana]	0.59	GO:0016757	_	_	_	_	_	_	None	_
Gh_A11G2071	3.20818	1.20742	0.00205	0.0367952	-1.40983	1.40983	321	gi|590640646|ref|XP_007030009.1|	Uncharacterized protein isoform 1 [Theobroma cacao]	0.81	gi|347595629|sp|Q556I2.2|AEDO_DICDI	RecName: Full=Probable 2-aminoethanethiol dioxygenase; AltName: Full=Cysteamine dioxygenase [Dictyostelium discoideum]	0.5	GO:0019530;GO:0047800;GO:0055114	3694.gw1.XIII.2146.1	hypothetical protein	0.7899	_	KOG4281	_	K10712	ADO
Gh_A02G0645	41.3354	15.5702	5e-05	0.00199199	-1.40859	1.40859	1155	gi|643728527|gb|KDP36552.1|	hypothetical protein JCGZ_08319 [Jatropha curcas]	0.89	gi|67476983|sp|Q9AWL7.2|GIGAN_ORYSJ	RecName: Full=Protein GIGANTEA [Oryza sativa Japonica Group]	0.83	_	3694.estExt_fgenesh4_pg.C_LG_V1131	hypothetical protein	0.8936	_	_	NOG263125	K12124	GI
Gh_A03G1894	9.84333	3.71457	0.00175	0.0328852	-1.40595	1.40595	145	gi|590682617|ref|XP_007041392.1|	Uncharacterized protein TCM_006313 [Theobroma cacao]	0.78	_	_	_	_	_	_	_	_	_	_	None	_
Gh_D03G1141	2.0353	0.772522	0.0009	0.0201769	-1.39759	1.39759	602	gi|255558854|ref|XP_002520450.1|	hypothetical protein RCOM_0731250 [Ricinus communis]	0.59	_	_	_	_	29760.GSVIVG00024184001	SubName: Full=Chromosome chr6 scaffold_3, whole genome shotgun sequence;	0.9507	_	KOG0297	NOG136070	None	_
Gh_D10G2220	9.76613	3.74177	0.0001	0.00360715	-1.38407	1.38407	224	gi|590665464|ref|XP_007036750.1|	21 kDa seed protein [Theobroma 21 kDa seed protein [Theobroma cacao]	0.79	gi|416662|sp|P32765.1|ASP_THECC	RecName: Full=21 kDa seed protein; Flags: Precursor [Theobroma cacao]	0.78	GO:0010951;GO:0004866	_	_	_	_	_	_	None	_
Gh_A01G1605	51.597	19.9064	5e-05	0.00199199	-1.37405	1.37405	382	gi|133902299|gb|ABO41830.1|	alcohol dehydrogenase A [Gossypium alcohol dehydrogenase A [Gossypium hirsutum]	1	gi|148841208|sp|P06525.2|ADH1_ARATH	RecName: Full=Alcohol dehydrogenase class-P [Arabidopsis thaliana]	0.9	GO:0008270;GO:0055114;GO:0016491	29760.GSVIVG00034834001	SubName: Full=Putative uncharacterized protein (Chromosome chr4 scaffold_73, whole genome sh [...]	0.916	COG1062	KOG0022	_	K00001	E1.1.1.1, adh
Gh_A02G1597	5.38441	2.08291	0.0004	0.0108938	-1.37019	1.37019	307	gi|590703459|ref|XP_007046879.1|	Chaperone DnaJ-domain superfamily protein, putative isoform 1 [Theobroma cacao]	0.58	_	_	_	_	_	_	_	_	_	_	None	_
Gh_Sca023164G01	5.70159	2.23689	0.0021	0.037429	-1.34987	1.34987	201	gi|590611266|ref|XP_007022053.1|	LRR and NB-ARC domains-containing disease resistance protein, putative [Theobroma cacao]	0.68	_	_	_	_	_	_	_	_	_	_	None	_
Gh_A08G0671	2.77574	1.10014	5e-05	0.00199199	-1.33519	1.33519	851	gi|590718475|ref|XP_007050826.1|	CW-type Zinc Finger, putative isoform 1 [Theobroma cacao]	0.82	_	_	_	GO:0008270	_	_	_	_	_	_	None	_
Gh_D06G1948	2.03688	0.809768	0.0024	0.041209	-1.33078	1.33078	456	gi|590662605|ref|XP_007035994.1|	CBL-interacting serine/threonine-protein kinase 1 isoform 1 [Theobroma cacao]	0.9	gi|56748824|sp|Q8RWC9.2|CIPK1_ARATH	RecName: Full=CBL-interacting serine/threonine-protein kinase 1; AltName: Full=SNF1-related kinase 3.16; AltName: Full=SOS2-like protein kinase PKS13 [Arabidopsis	0.81	GO:0004674;GO:0007165;GO:0005524;GO:0009069;GO:0006468	3694.estExt_fgenesh4_pg.C_LG_X0029	SubName: Full=CBL-interacting protein kinase 1;	0.8609	COG0515	KOG0583	_	None	_
Gh_A02G1711	4.39834	1.76116	5e-05	0.00199199	-1.32043	1.32043	424	gi|590701806|ref|XP_007046482.1|	Transmembrane amino acid transporter family protein [Theobroma cacao]	0.95	gi|51316800|sp|Q7Z2H8.1|S36A1_HUMAN	RecName: Full=Proton-coupled amino acid transporter 1; Short=Proton/amino acid transporter 1; Short=hPAT1; AltName: Full=Solute carrier family 36 member 1 [Homo sa	0.49	GO:0016021	3694.gw1.V.3673.1	aromatic and neutral amino acid transporter	0.9003	COG0814	KOG1304	_	K14209	SLC36A, PAT
Gh_D07G1325	3.65026	1.46894	5e-05	0.00199199	-1.31322	1.31322	661	gi|590720643|ref|XP_007051386.1|	Dicer-like 1 isoform 1 [Theobroma cacao]	0.93	gi|34922211|sp|Q9SP32.2|DCL1_ARATH	RecName: Full=Endoribonuclease Dicer homolog 1; AltName: Full=Dicer-like protein 1; Short=AtDCL1; AltName: Full=Protein ABNORMAL SUSPENSOR 1; AltName: Full=Protein	0.81	GO:0006396;GO:0003723;GO:0004525;GO:0005524;GO:0090502;GO:0051252;GO:0004386	29760.GSVIVG00026189001	SubName: Full=Chromosome chr15 scaffold_37, whole genome shotgun sequence;	0.9663	COG1111	_	_	K11592	DICER1, DCR1
Gh_A11G0142	4.1015	1.65636	5e-05	0.00199199	-1.30814	1.30814	579	gi|590674570|ref|XP_007039206.1|	Pseudo-response regulator 5, putative isoform 2 [Theobroma cacao]	0.85	gi|52783225|sp|Q6LA42.2|APRR5_ARATH	RecName: Full=Two-component response regulator-like APRR5; AltName: Full=Pseudo-response regulator 5 [Arabidopsis thaliana]	0.72	GO:0000160;GO:0005622	3694.eugene3.00150024	response regulator	0.8309	COG2204	KOG1601	_	K12130	PRR5
Gh_Sca005707G01	19.412	7.85139	5e-05	0.00199199	-1.30593	1.30593	682	gi|590613755|ref|XP_007022755.1|	Nucleoprotein TPR, putative isoform 1 [Theobroma cacao]	0.91	gi|302425121|sp|A4GSN8.1|NUA_ARATH	RecName: Full=Nuclear-pore anchor; AltName: Full=Protein TRANSLOCATED PROMOTER REGION; Short=AtTPR [Arabidopsis thaliana]	0.82	GO:0005622;GO:0006606;GO:0019013	_	_	_	_	_	_	K09291	TPR
Gh_Sca078511G01	51.6412	20.8951	0.00245	0.0418302	-1.30536	1.30536	73	gi|590591233|ref|XP_007016956.1|	Ubiquitin-activating enzyme 1 isoform 1 [Theobroma cacao]	0.97	gi|75220397|sp|P92974.1|UBE12_ARATH	RecName: Full=Ubiquitin-activating enzyme E1 2; Short=AtUBA2 [Arabidopsis thaliana]	0.93	GO:0008641;GO:0005524;GO:0006464;GO:0016881	_	_	_	_	_	_	K03178	UBE1, UBA1
Gh_D11G2787	278.133	113.091	5e-05	0.00199199	-1.29829	1.29829	158	gi|590644520|ref|XP_007031104.1|	Heat shock protein binding protein, putative [Theobroma cacao]	0.92	gi|62899940|sp|Q607A6.1|DNAJ_METCA	RecName: Full=Chaperone protein DnaJ [Methylococcus capsulatus str. Bath]	0.73	_	3694.estExt_fgenesh4_pm.C_1330037	hypothetical protein	0.9783	COG0484	KOG0714	_	None	_
Gh_D05G3234	3.58263	1.45964	5e-05	0.00199199	-1.29541	1.29541	508	gi|567921090|ref|XP_006452551.1|	hypothetical protein CICLE_v10010293mg [Citrus clementina]	0.79	gi|5915839|sp|O48923.1|C71DA_SOYBN	RecName: Full=Cytochrome P450 71D10 [Glycine max]	0.73	GO:0046872;GO:0016491	29760.GSVIVG00033335001	SubName: Full=Chromosome chr19 scaffold_66, whole genome shotgun sequence;	0.8274	COG2124	KOG0156	_	None	_
Gh_D03G1212	8.05127	3.29557	5e-05	0.00199199	-1.28869	1.28869	365	gi|590708176|ref|XP_007048203.1|	Cellulose synthase 6 [Theobroma Cellulose synthase 6 [Theobroma cacao]	0.95	gi|75322979|sp|Q69V23.1|CESA3_ORYSJ	RecName: Full=Probable cellulose synthase A catalytic subunit 3 [UDP-forming]	0.75	GO:0006011;GO:0005982;GO:0005985;GO:0016760;GO:0030244;GO:0016021;GO:0008270;GO:0071555;GO:0005886	_	_	_	_	_	_	K10999	CESA
Gh_A12G2182	3.711	1.51976	0.00055	0.0138713	-1.28796	1.28796	402	gi|590675071|ref|XP_007039343.1|	Glucan endo-1,3-beta-glucosidase 11 isoform 1 [Theobroma cacao]	0.88	gi|75154301|sp|Q8L868.1|E1311_ARATH	RecName: Full=Glucan endo-1,3-beta-glucosidase 11; AltName: Full=(1-)3)-beta-glucan endohydrolase 11; Short=(1-)3)-beta-glucanase 11; AltName: Full=Beta-1,3-endogl	0.82	GO:0004553;GO:0005975	3694.gw1.I.5511.1	hypothetical protein	0.8865	_	_	NOG271144	None	_
Gh_Sca067278G01	100.852	41.3084	5e-05	0.00199199	-1.28773	1.28773	143	gi|324984223|gb|ADY68845.1|	sucrose synthase [Gossypium sucrose synthase [Gossypium raimondii]	1	gi|75264339|sp|Q9LXL5.1|SUS4_ARATH	RecName: Full=Sucrose synthase 4; Short=AtSUS4; AltName: Full=Sucrose-UDP glucosyltransferase 4 [Arabidopsis thaliana]	0.97	GO:0005982;GO:0009058;GO:0016157;GO:0005985	_	_	_	_	_	_	K00695	E2.4.1.13
Gh_D11G0948	3.63125	1.52668	0.00115	0.0241565	-1.25007	1.25007	371	gi|643716984|gb|KDP28610.1|	hypothetical protein JCGZ_14381 [Jatropha curcas]	0.93	gi|122179246|sp|Q1KLZ2.1|CAS1_MALDO	RecName: Full=L-3-cyanoalanine synthase 1, mitochondrial; Short=MdCAS1; Flags: Precursor	0.9	GO:0006535;GO:0004124;GO:0016740;GO:0009333	29760.GSVIVG00026889001	RecName: Full=Cysteine synthase; EC=2.5.1.47;	0.9111	COG0031	KOG1252	_	K13034	ATCYSC1
Gh_A12G1670	3.47364	1.46261	5e-05	0.00199199	-1.2479	1.2479	1537	gi|590669156|ref|XP_007037695.1|	Uncharacterized protein TCM_014412 [Theobroma cacao]	0.8	gi|148887455|sp|Q8S8P5.2|WRK33_ARATH	RecName: Full=Probable WRKY transcription factor 33; AltName: Full=WRKY DNA-binding protein 33 [Arabidopsis thaliana]	0.51	GO:0006511;GO:0005667;GO:0006355;GO:0043565;GO:0045449;GO:0003700	_	_	_	_	_	_	None	_
Gh_A05G1044	42.8237	18.1197	5e-05	0.00199199	-1.24085	1.24085	1134	gi|590615777|ref|XP_007023319.1|	TOPLESS-related 1 isoform 1 [Theobroma cacao]	0.96	gi|75332047|sp|Q94AI7.1|TPL_ARATH	RecName: Full=Protein TOPLESS; AltName: Full=WUS-interacting protein 1 [Arabidopsis thaliana]	0.92	GO:0006355	3702.AT1G15750.1-P	TPL (TOPLESS); protein binding / protein homodimerization/ transcription repressor; Encodes [...]	0.9626	COG2319	KOG0266	_	None	_
Gh_D06G2116	27.0737	11.5908	5e-05	0.00199199	-1.22391	1.22391	310	gi|590622693|ref|XP_007025118.1|	Uncharacterized protein isoform 1 [Theobroma cacao]	0.88	gi|122194651|sp|Q1XDB4.1|YCF23_PYRYE	RecName: Full=Uncharacterized protein ycf23 (chloroplast) [Pyropia yezoensis]	0.66	GO:0008152;GO:0003824	3694.estExt_fgenesh4_pg.C_LG_XI0474	hypothetical protein	0.8869	_	_	NOG10863	None	_
Gh_A12G2342	13.2211	5.67576	0.0018	0.0335729	-1.21996	1.21996	134	gi|590672524|ref|XP_007038636.1|	Uncharacterized protein isoform 2 [Theobroma cacao]	0.7	_	_	_	_	_	_	_	_	_	_	None	_
Gh_A08G1835	149.807	64.3131	5e-05	0.00199199	-1.21992	1.21992	152	gi|590644520|ref|XP_007031104.1|	Heat shock protein binding protein, putative [Theobroma cacao]	0.88	gi|82187285|sp|Q6PGY5.1|DJC21_DANRE	RecName: Full=DnaJ homolog subfamily C member 21; AltName: Full=DnaJ homolog subfamily A member 5	0.63	_	3694.estExt_fgenesh4_pm.C_1330037	hypothetical protein	0.9022	COG0484	KOG0714	_	None	_
Gh_Sca005684G02	11.173	4.80028	5e-05	0.00199199	-1.21883	1.21883	376	gi|590627708|ref|XP_007026516.1|	TRNA synthetase class I (I, L, M and V) family protein isoform 1 [Theobroma cacao]	0.97	gi|549028|sp|P36422.1|SYI_TETTH	RecName: Full=Isoleucine--tRNA ligase; AltName: Full=Isoleucyl-tRNA synthetase; Short=IleRS	0.79	GO:0005524;GO:0002161;GO:0006094;GO:0006096;GO:0009097;GO:0006450;GO:0004822;GO:0009099;GO:0009098;GO:0006428;GO:0005829;GO:0007010;GO:0009651;GO:0010498	_	_	_	_	_	_	K01870	IARS, ileS
Gh_A01G0581	111.741	48.026	5e-05	0.00199199	-1.21827	1.21827	357	gi|295687239|gb|ADG27845.1|	thiazole biosynthetic enzyme [Gossypium hirsutum]	0.99	gi|6094476|sp|O23787.1|THI4_CITSI	RecName: Full=Thiamine thiazole synthase, chloroplastic; AltName: Full=Thiazole biosynthetic enzyme; Flags: Precursor [Citrus sinensis]	0.9	GO:0009228;GO:0046872;GO:0005829;GO:0052837;GO:0006950;GO:0009570	29760.GSVIVG00027385001	SubName: Full=Chromosome chr19 scaffold_4, whole genome shotgun sequence;	0.9252	COG1635	KOG2960	_	K03146	thi1
Gh_A05G0588	219.614	94.5831	5e-05	0.00199199	-1.21532	1.21532	85	gi|590584823|ref|XP_007015284.1|	Uncharacterized protein TCM_040927 [Theobroma cacao]	0.59	_	_	_	_	_	_	_	_	_	_	None	_
Gh_D05G3150	5.65714	2.44335	0.0002	0.00632409	-1.21121	1.21121	343	gi|590694279|ref|XP_007044564.1|	Potassium transporter family protein isoform 1 [Theobroma cacao]	0.93	gi|38502862|sp|O80739.2|POT12_ARATH	RecName: Full=Putative potassium transporter 12; Short=AtPOT12 [Arabidopsis thaliana]	0.89	GO:0016021;GO:0071805;GO:0009507;GO:0015079	_	_	_	_	_	_	K03549	kup
Gh_D01G0349	2.33509	1.00993	5e-05	0.00199199	-1.20922	1.20922	778	gi|590606999|ref|XP_007020887.1|	Cc-nbs-lrr resistance protein [Theobroma cacao]	0.55	_	_	_	_	_	_	_	_	_	_	None	_
Gh_A10G0663	30.012	12.9879	5e-05	0.00199199	-1.20837	1.20837	184	gi|359482343|ref|XP_002268413.2|	PREDICTED: ethylene-responsive transcription factor WIN1-like [Vitis vinifera]	0.8	gi|122214280|sp|Q3E958.1|SHN3_ARATH	RecName: Full=Ethylene-responsive transcription factor SHINE 3 [Arabidopsis thaliana]	0.73	_	29760.GSVIVG00000349001	SubName: Full=Chromosome chr9 scaffold_104, whole genome shotgun sequence;	0.8407	_	_	NOG270692	None	_
Gh_A06G1545	9.79227	4.24022	5e-05	0.00199199	-1.2075	1.2075	467	gi|470142862|ref|XP_004307111.1|	PREDICTED: uncharacterized protein LOC101306958 [Fragaria vesca subsp. vesca]	0.8	_	_	_	_	29760.GSVIVG00030921001	SubName: Full=Chromosome undetermined scaffold_53, whole genome shotgun sequence;	0.7935	_	_	NOG224161	None	_
Gh_D05G1131	2.02509	0.882959	0.0007	0.0167282	-1.19757	1.19757	733	gi|590616201|ref|XP_007023439.1|	Multidrug resistance-associated protein 11 [Theobroma cacao]	0.91	gi|298286923|sp|Q9SKX0.3|AB13C_ARATH	RecName: Full=ABC transporter C family member 13; Short=ABC transporter ABCC.13; Short=AtABCC13; AltName: Full=ATP-energized glutathione S-conjugate pump 11; AltN	0.88	GO:0055085;GO:0008152;GO:0005524;GO:0016021;GO:0042626	_	_	_	_	_	_	K05674	ABCC10
Gh_D09G1513	75.1358	32.8693	5e-05	0.00199199	-1.19276	1.19276	787	gi|590630172|ref|XP_007027197.1|	Sensory transduction histidine kinase, putative isoform 1 [Theobroma cacao]	0.88	gi|52783235|sp|Q93WK5.1|APRR7_ARATH	RecName: Full=Two-component response regulator-like APRR7; AltName: Full=Pseudo-response regulator 7 [Arabidopsis thaliana]	0.71	GO:0010017;GO:0045892;GO:0016310;GO:0003677;GO:0016301;GO:0009266;GO:0042752;GO:0000160;GO:0048574;GO:0005739	3694.estExt_fgenesh4_pm.C_LG_VIII0151	pseudo response regulator	0.8929	COG3437;COG4753	_	_	K12129	PRR7
Gh_Sca006111G01	32.2152	14.1037	0.0003	0.00871602	-1.19167	1.19167	109	gi|590604638|ref|XP_007020293.1|	Peroxin 5 isoform 3 [Theobroma Peroxin 5 isoform 3 [Theobroma cacao]	0.86	gi|75334058|sp|Q9FMA3.1|PEX5_ARATH	RecName: Full=Peroxisome biogenesis protein 5; AltName: Full=Peroxin-5; Short=AtPEX5; AltName: Full=Peroxisomal targeting signal type 1 receptor; AltName: Full=Pex5	0.83	GO:0006635;GO:0009733;GO:0006869;GO:0005622;GO:0010351;GO:0006625;GO:0006891	_	_	_	_	_	_	K13342	PEX5, PXR1
Gh_A05G3862	11.7716	5.16898	0.00045	0.0119291	-1.18736	1.18736	206	gi|590615315|ref|XP_007023188.1|	UPF0706 protein [Theobroma UPF0706 protein [Theobroma cacao]	0.94	gi|75274407|sp|Q9LVZ8.1|LOR12_ARATH	RecName: Full=Protein LURP-one-related 12 [Arabidopsis thaliana]	0.84	_	3694.estExt_Genewise1_v1.C_440116	SubName: Full=Putative uncharacterized protein;	0.8488	_	_	NOG238034;NOG269861	None	_
Gh_D10G2568	9.97466	4.38011	5e-05	0.00199199	-1.1873	1.1873	775	gi|590661939|ref|XP_007035811.1|	PAS domain-containing protein tyrosine kinase family protein [Theobroma cacao]	0.85	gi|75334172|sp|Q9FPR3.1|EDR1_ARATH	RecName: Full=Serine/threonine-protein kinase EDR1; AltName: Full=MAPKK kinase EDR1; AltName: Full=Protein ENHANCED DISEASE RESISTANCE 1; Short=AtEDR1; AltName: Ful	0.68	GO:0007165;GO:0005524;GO:0004672;GO:0006468;GO:0004871	3694.eugene3.00101399	hypothetical protein	0.8118	COG0515	KOG0192	_	None	_
Gh_A03G1723	19.8747	8.74959	5e-05	0.00199199	-1.18365	1.18365	526	gi|590685614|ref|XP_007042146.1|	Glucose-1-phosphate adenylyltransferase family protein [Theobroma cacao]	0.93	gi|232166|sp|Q00081.1|GLGL1_SOLTU	RecName: Full=Glucose-1-phosphate adenylyltransferase large subunit 1; AltName: Full=ADP-glucose pyrophosphorylase; AltName: Full=ADP-glucose synthase; AltName: Full	0.91	GO:0019252;GO:0005978;GO:0008878;GO:0005985;GO:0009507	3694.fgenesh4_pg.C_LG_IV001321	glucose-1-phosphate adenylyltransferase (EC:2.7.7.27); This protein plays a role in synthesi [...]	0.865	COG0448	KOG1322	_	K00975	glgC
Gh_D04G1847	5.56386	2.45572	0.0002	0.00632409	-1.17994	1.17994	369	gi|567854751|ref|XP_006420495.1|	hypothetical protein CICLE_v10004657mg [Citrus clementina]	0.64	_	_	_	_	_	_	_	_	_	_	None	_
Gh_D13G2355	25.6285	11.3333	5e-05	0.00199199	-1.17718	1.17718	837	gi|590588413|ref|XP_007016192.1|	Phosphorylase isoform 1 [Theobroma cacao]	0.97	gi|417488|sp|P32811.1|PHSH_SOLTU	RecName: Full=Alpha-glucan phosphorylase, H isozyme; AltName: Full=Starch phosphorylase H [Solanum tuberosum]	0.93	GO:0019252;GO:0009414;GO:0005829;GO:0030170;GO:0008184;GO:0009507	3694.estExt_fgenesh4_pg.C_LG_IX1158	hypothetical protein; Phosphorylase is an important allosteric enzyme in carbohydrate metabo [...]	0.9538	COG0058	KOG2099	_	K00688	E2.4.1.1, glgP, PYG
Gh_D05G1158	2.41083	1.06776	0.00035	0.00983058	-1.17494	1.17494	741	gi|590615819|ref|XP_007023331.1|	Uncharacterized protein TCM_027312 [Theobroma cacao]	0.85	gi|395406776|sp|F4I171.1|MD15A_ARATH	RecName: Full=Mediator of RNA polymerase II transcription subunit 15a	0.6	GO:0005667;GO:0006355;GO:0003712;GO:0045449	_	_	_	_	_	_	K14972	PAXIP1, PTIP
Gh_D10G2436	10.378	4.60154	0.0006	0.014811	-1.17334	1.17334	182	gi|590680571|ref|XP_007040898.1|	RING/U-box superfamily protein, putative [Theobroma cacao]	0.75	_	_	_	GO:0046872	_	_	_	_	_	_	None	_
Gh_A02G0378	106.67	47.5599	5e-05	0.00199199	-1.16534	1.16534	305	gi|2829206|gb|AAC00500.1|	proline-rich protein precursor [Gossypium hirsutum]	1	gi|119714|sp|P13983.1|EXTN_TOBAC	RecName: Full=Extensin; AltName: Full=Cell wall hydroxyproline-rich glycoprotein; Flags: Precursor [Nicotiana tabacum]	0.35	_	_	_	_	_	_	_	None	_
Gh_D13G2550	1006.68	449.676	5e-05	0.00199199	-1.16265	1.16265	168	gi|211906474|gb|ACJ11730.1|	glycine-rich RNA-binding protein [Gossypium hirsutum]	1	gi|1346180|sp|P49310.1|GRP1_SINAL	RecName: Full=Glycine-rich RNA-binding protein GRP1A	0.74	GO:0000166;GO:0003676	39947.LOC_Os12g43600.1	RNA recognition motif containing protein, expressed	0.9351	COG0724	KOG0118	_	None	_
Gh_A11G0805	3.87113	1.73426	5e-05	0.00199199	-1.15843	1.15843	564	gi|590722012|ref|XP_007051778.1|	Major facilitator superfamily protein isoform 1 [Theobroma cacao]	0.94	gi|75244391|sp|Q8GX78.1|ANTR2_ARATH	RecName: Full=Probable anion transporter 2, chloroplastic; AltName: Full=Phosphate transporter PHT4;4; Flags: Precursor [Arabidopsis thaliana]	0.93	GO:0006817;GO:0006098;GO:0055085;GO:0005315;GO:0016021;GO:0009941	3702.AT4G00370.1-P	ANTR2; inorganic phosphate transmembrane transporter/ organic anion transmembrane transporte [...]	0.9375	COG0477	KOG2532	_	None	_
Gh_A07G2199	8.30189	3.7261	5e-05	0.00199199	-1.15577	1.15577	1558	gi|590713909|ref|XP_007049768.1|	Helicase/SANT-associated, putative isoform 5 [Theobroma cacao]	0.83	gi|341941110|sp|Q8CHI8.3|EP400_MOUSE	RecName: Full=E1A-binding protein p400; AltName: Full=Domino homolog; Short=mDomino; AltName: Full=p400 kDa SWI2/SNF2-related protein [Mus musculus]	0.6	GO:0003677;GO:0008152;GO:0000785;GO:0003682;GO:0004386	3694.fgenesh4_pg.C_LG_II002451	hypothetical protein	0.7881	_	KOG0391	_	None	_
Gh_D01G1853	65.4849	29.4469	5e-05	0.00199199	-1.15305	1.15305	382	gi|133902299|gb|ABO41830.1|	alcohol dehydrogenase A [Gossypium alcohol dehydrogenase A [Gossypium hirsutum]	1	gi|148841208|sp|P06525.2|ADH1_ARATH	RecName: Full=Alcohol dehydrogenase class-P [Arabidopsis thaliana]	0.9	GO:0008270;GO:0055114;GO:0016491	29760.GSVIVG00034834001	SubName: Full=Putative uncharacterized protein (Chromosome chr4 scaffold_73, whole genome sh [...]	0.916	COG1062	KOG0022	_	K00001	E1.1.1.1, adh
Gh_A03G0390	7.52085	3.38586	0.00085	0.0193303	-1.15137	1.15137	231	gi|590588633|ref|XP_007016250.1|	Uncharacterized protein isoform 1 [Theobroma cacao]	0.83	_	_	_	_	_	_	_	_	_	_	None	_
Gh_D04G0440	3.89146	1.75655	5e-05	0.00199199	-1.14757	1.14757	675	gi|147852346|emb|CAN80115.1|	hypothetical protein VITISV_032527 [Vitis vinifera]	0.92	gi|122231638|sp|Q1PDW5.1|FTSH6_ARATH	RecName: Full=ATP-dependent zinc metalloprotease FTSH 6, chloroplastic; Short=AtFTSH6; Flags: Precursor [Arabidopsis thaliana]	0.9	GO:0016020;GO:0006508;GO:0005524;GO:0004222	3694.fgenesh4_pg.C_LG_XVII000398	hypothetical protein	0.9096	COG0465	KOG0731	_	K03798	ftsH, hflB
Gh_D12G0095	6.46392	2.91773	0.0004	0.0108938	-1.14756	1.14756	297	gi|590718634|ref|XP_007050858.1|	Heavy metal transport/detoxification superfamily protein, putative [Theobroma Heavy metal transport/detoxification superfamily prot	0.64	_	_	_	_	3694.fgenesh4_pg.C_LG_XIV001402	hypothetical protein	0.7653	_	KOG1603	_	None	_
Gh_D04G0767	2.53464	1.14834	0.00165	0.0314576	-1.14223	1.14223	512	gi|590646858|ref|XP_007031738.1|	Glucose-6-phosphate dehydrogenase 6 [Theobroma cacao]	0.96	gi|585165|sp|P37830.1|G6PD_SOLTU	RecName: Full=Glucose-6-phosphate 1-dehydrogenase, cytoplasmic isoform; Short=G6PD	0.92	GO:0006006;GO:0050661;GO:0006749;GO:0006098;GO:0055114;GO:0004345	3694.estExt_Genewise1_v1.C_LG_XVII0625	RecName: Full=Glucose-6-phosphate 1-dehydrogenase; EC=1.1.1.49;	0.9181	COG0364	KOG0563	_	K00036	G6PD, zwf
Gh_D02G0096	1.36893	0.622348	0.00025	0.00757223	-1.13726	1.13726	1617	gi|590654457|ref|XP_007033702.1|	SacI domain-containing protein / WW domain-containing protein isoform 1 [Theobroma cacao]	0.9	gi|75145696|sp|Q7XZU0.1|SAC9_ARATH	RecName: Full=Probable phosphoinositide phosphatase SAC9; Short=AtSAC9; AltName: Full=Protein SUPPRESSOR OF ACTIN 9; AltName: Full=SAC domain protein 9 [Arabidopsis	0.83	GO:0008152;GO:0042578	29760.GSVIVG00034697001	SubName: Full=Chromosome chr5 scaffold_72, whole genome shotgun sequence;	0.8726	COG5329	KOG1888	_	None	_
Gh_D10G1822	6.08793	2.78219	5e-05	0.00199199	-1.12973	1.12973	3947	gi|590662315|ref|XP_007035914.1|	Calcium-dependent lipid-binding family protein isoform 1 [Theobroma cacao]	0.93	gi|71152975|sp|Q96RL7.2|VP13A_HUMAN	RecName: Full=Vacuolar protein sorting-associated protein 13A; AltName: Full=Chorea-acanthocytosis protein; AltName: Full=Chorein [Homo sapiens]	0.62	_	_	_	_	_	_	_	None	_
Gh_Sca109874G01	38.2295	17.4774	0.00115	0.0241565	-1.1292	1.1292	90	gi|565380907|ref|XP_006356832.1|	PREDICTED: probable xyloglucan glycosyltransferase 12-like [Solanum tuberosum]	0.99	gi|75156391|sp|Q8LIY0.1|CSLC1_ORYSJ	RecName: Full=Probable xyloglucan glycosyltransferase 1; AltName: Full=Cellulose synthase-like protein C1; AltName: Full=OsCslC1 [Oryza sativa Japonica Group]	0.99	_	_	_	_	_	_	_	None	_
Gh_A01G1909	16.3545	7.47917	5e-05	0.00199199	-1.12874	1.12874	298	gi|590629444|ref|XP_007026991.1|	Haloacid dehalogenase-like hydrolase (HAD) superfamily protein [Theobroma cacao]	0.94	_	_	_	GO:0016787;GO:0008152	3694.estExt_fgenesh4_pg.C_LG_VI0678	SubName: Full=Putative uncharacterized protein;	0.8426	COG1011	KOG3109	_	K07025	K07025
Gh_A09G1502	77.8986	35.6278	5e-05	0.00199199	-1.12859	1.12859	795	gi|590630172|ref|XP_007027197.1|	Sensory transduction histidine kinase, putative isoform 1 [Theobroma cacao]	0.86	gi|52783235|sp|Q93WK5.1|APRR7_ARATH	RecName: Full=Two-component response regulator-like APRR7; AltName: Full=Pseudo-response regulator 7 [Arabidopsis thaliana]	0.7	GO:0010017;GO:0045892;GO:0016310;GO:0003677;GO:0016301;GO:0009266;GO:0042752;GO:0000160;GO:0048574;GO:0005739	3702.AT5G02810.1-P	PRR7 (PSEUDO-RESPONSE REGULATOR 7); transcription regulator/ two-component response regulato [...]	0.8992	COG3947;COG3437	_	_	K12129	PRR7
Gh_D05G3338	4.73243	2.1676	5e-05	0.00199199	-1.12648	1.12648	1032	gi|566258988|ref|XP_006389060.1|	hypothetical protein POPTR_0049s00210g, partial [Populus trichocarpa]	0.67	gi|46395628|sp|O81825.1|DRL28_ARATH	RecName: Full=Probable disease resistance protein At4g27220 [Arabidopsis thaliana]	0.55	_	_	_	_	_	_	_	None	_
Gh_A05G0587	8.1077	3.71725	0.00045	0.0119291	-1.12506	1.12506	259	gi|590584791|ref|XP_007015276.1|	Smg-7, putative isoform 1 [Theobroma cacao]	0.96	gi|510785808|sp|A9QM73.1|SMG7_ARATH	RecName: Full=Protein SMG7; AltName: Full=SMG7 homolog [Arabidopsis thaliana]	0.77	GO:0005634;GO:0090306	_	_	_	_	_	_	K14409	SMG7, EST1C
Gh_A13G1960	24.1172	11.0616	5e-05	0.00199199	-1.1245	1.1245	837	gi|590588413|ref|XP_007016192.1|	Phosphorylase isoform 1 [Theobroma cacao]	0.97	gi|417488|sp|P32811.1|PHSH_SOLTU	RecName: Full=Alpha-glucan phosphorylase, H isozyme; AltName: Full=Starch phosphorylase H [Solanum tuberosum]	0.93	GO:0019252;GO:0009414;GO:0005829;GO:0030170;GO:0008184;GO:0009507	3694.estExt_fgenesh4_pg.C_LG_IX1158	hypothetical protein; Phosphorylase is an important allosteric enzyme in carbohydrate metabo [...]	0.9562	COG0058	KOG2099	_	K00688	E2.4.1.1, glgP, PYG
Gh_D11G2671	10.2066	4.68468	5e-05	0.00199199	-1.12348	1.12348	994	gi|590643253|ref|XP_007030752.1|	NB-ARC domain-containing disease resistance protein, putative isoform 1 [Theobroma cacao]	0.78	gi|46396029|sp|Q9T048.1|DRL27_ARATH	RecName: Full=Disease resistance protein At4g27190 [Arabidopsis thaliana]	0.51	GO:0043168;GO:0032559;GO:0032550	_	_	_	_	_	_	None	_
Gh_D05G2997	10.2885	4.74329	5e-05	0.00199199	-1.11707	1.11707	375	gi|645230692|ref|XP_008222050.1|	PREDICTED: uncharacterized protein At3g61260 [Prunus mume]	0.76	_	_	_	_	3694.eugene3.00081661	hypothetical protein	0.7628	_	_	NOG259032	None	_
Gh_D05G0228	14.2941	6.59239	5e-05	0.00199199	-1.11655	1.11655	205	gi|255546499|ref|XP_002514309.1|	DNA binding protein, putative [Ricinus communis]	0.85	gi|75311616|sp|Q9LV52.1|HSFC1_ARATH	RecName: Full=Heat stress transcription factor C-1; Short=AtHsfC1; AltName: Full=AtHsf-08 [Arabidopsis thaliana]	0.8	GO:0005634;GO:0005667;GO:0006355;GO:0043565;GO:0045449;GO:0003700;GO:0009408	29760.GSVIVG00016746001	SubName: Full=Putative uncharacterized protein (Chromosome chr11 scaffold_13, whole genome s [...]	0.8378	COG5169	KOG0627	_	K09419	HSFF
Gh_Sca068309G01	38.7682	17.885	0.00125	0.0256779	-1.11612	1.11612	91	gi|565465192|ref|XP_006290560.1|	hypothetical protein CARUB_v10016646mg [Capsella rubella]	1	gi|12230459|sp|Q9LV11.1|PMA11_ARATH	RecName: Full=ATPase 11, plasma membrane-type; AltName: Full=Proton pump 11 [Arabidopsis thaliana]	0.99	_	_	_	_	_	_	_	K01535	E3.6.3.6
Gh_A03G0049	54.4514	25.1363	5e-05	0.00199199	-1.1152	1.1152	708	gi|590669520|ref|XP_007037798.1|	Sieve element occlusion e, putative [Theobroma cacao]	0.84	_	_	_	_	_	_	_	_	_	_	None	_
Gh_D11G0676	2.16621	0	5e-05	0.00199199	-1.11517	1.11517	141	gi|573017164|gb|AHF72744.1|	cold-circadian (cold circadian rhythm-RNA binding)-like protein [Gossypium hirsutum]	1	gi|417260|sp|Q03200.1|LIRP1_ORYSJ	RecName: Full=Light-regulated protein; Flags: Precursor [Oryza sativa Japonica Group]	0.65	GO:0009507;GO:0030003;GO:0070838	3694.estExt_fgenesh4_pm.C_LG_I0202	hypothetical protein	0.7519	_	_	NOG278951	None	_
Gh_D09G0277	21.1057	9.7449	5e-05	0.00199199	-1.11491	1.11491	306	gi|590646167|ref|XP_007031547.1|	DNAJ heat shock N-terminal domain-containing protein [Theobroma cacao]	0.84	gi|54036985|sp|P63971.1|DNAJ_STAAN	RecName: Full=Chaperone protein DnaJ [Staphylococcus aureus subsp. aureus N315]	0.72	_	29760.GSVIVG00027371001	SubName: Full=Chromosome chr19 scaffold_4, whole genome shotgun sequence;	0.88	COG1141;COG2214;COG0484	KOG0716	_	None	_
Gh_A01G1324	21.9188	10.1409	5e-05	0.00199199	-1.11198	1.11198	1482	gi|590694868|ref|XP_007044731.1|	Pyruvate phosphate dikinase, PEP/pyruvate binding domain isoform 1 [Theobroma cacao]	0.93	gi|57012986|sp|Q9AWA5.2|GWD1_SOLTU	RecName: Full=Alpha-glucan water dikinase, chloroplastic; AltName: Full=Starch-related R1 protein; Flags: Precursor	0.83	GO:0007623;GO:0016310;GO:0005524;GO:0016301;GO:0019252;GO:0005739;GO:0009941;GO:0005983;GO:0009631;GO:0009570	29760.GSVIVG00002767001	SubName: Full=Chromosome chr1 scaffold_135, whole genome shotgun sequence;	0.9745	COG0574	_	_	K08244	E2.7.9.4
Gh_D01G1766	9.18222	4.25236	5e-05	0.00199199	-1.11058	1.11058	464	gi|590682698|ref|XP_007041415.1|	Gb:AAC34331.1 [Theobroma cacao]	0.89	_	_	_	_	_	_	_	_	_	_	None	_
Gh_A07G1503	8.35019	3.87599	5e-05	0.00199199	-1.10724	1.10724	308	gi|590653216|ref|XP_007033360.1|	Nuclear matrix constituent protein 1-like protein, putative isoform 1 [Theobroma cacao]	0.92	gi|26397174|sp|Q9FLH0.1|NMCP_ARATH	RecName: Full=Putative nuclear matrix constituent protein 1-like protein; Short=NMCP1-like [Arabidopsis thaliana]	0.58	GO:0005652;GO:0006997;GO:0005829	_	_	_	_	_	_	None	_
Gh_D12G0631	17.9448	8.37074	5e-05	0.00199199	-1.10014	1.10014	457	gi|590704007|ref|XP_007047037.1|	PQ-loop repeat family protein / transmembrane family protein isoform 1 [Theobroma cacao]	0.91	_	_	_	GO:0016021	29760.GSVIVG00025009001	SubName: Full=Chromosome chr4 scaffold_32, whole genome shotgun sequence;	0.8207	_	KOG2913	_	None	_
Gh_A09G1053	32.2054	15.1263	5e-05	0.00199199	-1.09024	1.09024	356	gi|268528131|gb|ACZ06242.1|	caffeic acid O-methyltransferase 3 [Gossypium hirsutum]	1	gi|30315948|sp|Q9FQY8.2|COMT1_CAPAN	RecName: Full=Caffeic acid 3-O-methyltransferase; Short=CAOMT; Short=COMT; AltName: Full=S-adenosysl-L-methionine:caffeic acid 3-O-methyltransferase [Capsicum annu	0.75	GO:0008171;GO:0032259;GO:0046983	3694.estExt_Genewise1_v1.C_LG_XIV1942	SubName: Full=Putative uncharacterized protein;	0.8214	COG0500	KOG3178	_	None	_
Gh_D03G1614	1.92481	0.904935	5e-05	0.00199199	-1.08883	1.08883	4386	gi|590676054|ref|XP_007039626.1|	Pleckstrin (PH) domain-containing protein isoform 3 [Theobroma cacao]	0.9	gi|613504586|sp|Q5THJ4.2|VP13D_HUMAN	RecName: Full=Vacuolar protein sorting-associated protein 13D [Homo sapiens]	0.57	_	3702.AT4G17140.2-P	unknown protein; FUNCTIONS IN: molecular_function unknown; INVOLVED IN: biological_process u [...]	0.7746	_	KOG1809	_	None	_
Gh_D08G1270	17.2411	8.11619	5e-05	0.00199199	-1.08698	1.08698	189	_	_	_	_	_	_	_	_	_	_	_	_	_	None	_
Gh_A05G3687	1.91988	0.904877	0.0003	0.00871602	-1.08522	1.08522	854	gi|590651045|ref|XP_007032794.1|	Malectin/receptor protein kinase family protein isoform 1 [Theobroma cacao]	0.83	gi|75333906|sp|Q9FID8.1|Y5900_ARATH	RecName: Full=Putative receptor-like protein kinase At5g39000; Flags: Precursor [Arabidopsis thaliana]	0.62	GO:0004674;GO:0005524;GO:0009069;GO:0006468	3694.grail3.0155000401	hypothetical protein	0.7692	COG0515	_	_	None	_
Gh_D02G0075	94.8161	44.7732	5e-05	0.00199199	-1.0825	1.0825	347	gi|590654197|ref|XP_007033632.1|	Zinc-binding dehydrogenase family protein [Theobroma cacao]	0.91	gi|75206691|sp|Q9SLN8.1|DBR_TOBAC	RecName: Full=2-alkenal reductase (NADP(+)-dependent); AltName: Full=Alkenal double bound reductase; AltName: Full=Allylic alcohol dehydrogenase 1; Short=allyl-ADH1;	0.88	GO:0008270;GO:0055114;GO:0016491	29760.GSVIVG00034730001	SubName: Full=Putative uncharacterized protein (Chromosome chr5 scaffold_72, whole genome sh [...]	0.8957	COG2130	KOG1196	_	K07119	K07119
Gh_D07G0358	2.96096	1.40112	0.0007	0.0167282	-1.07948	1.07948	577	gi|590578151|ref|XP_007013426.1|	Major facilitator superfamily protein isoform 2 [Theobroma cacao]	0.96	gi|75314150|sp|Q9SZY4.1|PTR27_ARATH	RecName: Full=Protein NRT1/ PTR FAMILY 6.2; Short=AtNPF6.2; AltName: Full=Nitrate transporter 1.4 [Arabidopsis thaliana]	0.86	GO:0006857;GO:0005623;GO:0016021;GO:0005215;GO:0030003;GO:0070838	29760.GSVIVG00016880001	SubName: Full=Chromosome chr11 scaffold_13, whole genome shotgun sequence;	0.8965	COG3104	KOG1237	_	None	_
Gh_D12G2385	3.85358	1.82659	5e-05	0.00199199	-1.07705	1.07705	789	gi|590674799|ref|XP_007039268.1|	Duplicated homeodomain-like superfamily protein, putative isoform 1 [Theobroma cacao]	0.69	gi|325530077|sp|Q9C882.2|GTL1_ARATH	RecName: Full=Trihelix transcription factor GTL1; AltName: Full=GT2-LIKE protein 1; Short=AtGTL1; Short=Protein GT-2-LIKE1; AltName: Full=Trihelix DNA-binding prot	0.77	GO:0044763;GO:0016043;GO:0048523;GO:0005488;GO:0044767	3694.gw1.I.5709.1	hypothetical protein	0.8602	_	KOG4282	_	None	_
Gh_Sca004751G01	2.60223	1.23504	5e-05	0.00199199	-1.07519	1.07519	1446	gi|566183935|ref|XP_002311566.2|	hypothetical protein POPTR_0008s14260g [Populus trichocarpa]	0.82	gi|205816263|sp|O15050.4|TRNK1_HUMAN	RecName: Full=TPR and ankyrin repeat-containing protein 1; AltName: Full=Lupus brain antigen 1 homolog [Homo sapiens]	0.57	GO:0016787;GO:0005524;GO:0008152	3694.fgenesh4_pg.C_LG_VIII001278	hypothetical protein	0.8217	_	_	NOG67722	None	_
Gh_A06G0620	6.63476	3.15441	0.00085	0.0193303	-1.07267	1.07267	275	gi|543176592|gb|AGV54319.1|	caffeoyl CoA O-methyltransferase [Phaseolus vulgaris]	0.75	gi|30580368|sp|Q9C5D7.1|CAMT3_ARATH	RecName: Full=Probable caffeoyl-CoA O-methyltransferase At4g26220; AltName: Full=Trans-caffeoyl-CoA 3-O-methyltransferase; Short=CCoAMT; Short=CCoAOMT [Arabidopsis	0.92	GO:0008168	3694.estExt_fgenesh4_pm.C_1450034	hypothetical protein	0.9344	COG4122	KOG1663	_	K00588	E2.1.1.104
Gh_D04G1489	65.5288	31.206	5e-05	0.00199199	-1.07031	1.07031	350	gi|590688857|ref|XP_007043064.1|	TRNA--methyltransferase non-catalytic subunit TRM6MTase subunit TRM6 isoform 1 [Theobroma TRNA--methyltransferase non-catalyti	0.92	_	_	_	GO:0008168;GO:0032259	3694.estExt_fgenesh4_pm.C_660087	hypothetical protein	0.9482	_	_	NOG239605	None	_
Gh_D05G3257	7.32398	3.49139	5e-05	0.00199199	-1.06883	1.06883	1583	gi|590635969|ref|XP_007028756.1|	Cc-nbs-lrr resistance protein, putative [Theobroma cacao]	0.63	gi|46395628|sp|O81825.1|DRL28_ARATH	RecName: Full=Probable disease resistance protein At4g27220 [Arabidopsis thaliana]	0.52	_	_	_	_	_	_	_	None	_
Gh_D05G0363	235.867	112.477	5e-05	0.00199199	-1.06834	1.06834	805	gi|258489633|gb|ACV72640.1|	sucrose synthase 1 [Gossypium sucrose synthase [Gossypium hirsutum]	1	gi|3915873|sp|P13708.2|SUSY_SOYBN	RecName: Full=Sucrose synthase; AltName: Full=Nodulin-100; Short=N-100; AltName: Full=Sucrose-UDP glucosyltransferase [Glycine max]	0.95	GO:0005982;GO:0009058;GO:0016157;GO:0005985	3694.estExt_fgenesh4_pg.C_280066	sucrose synthase (EC:2.4.1.13)	0.9566	COG0438	KOG0853	_	K00695	E2.4.1.13
Gh_A12G2523	23.3651	11.1724	5e-05	0.00199199	-1.06442	1.06442	1172	gi|590717350|ref|XP_007050592.1|	Time for coffee, putative isoform 1 [Theobroma cacao]	0.72	gi|172045840|sp|Q94KE2.2|TIC_ARATH	RecName: Full=Protein TIME FOR COFFEE [Arabidopsis thaliana]	0.51	_	_	_	_	_	_	_	None	_
Gh_D08G1167	350.636	167.784	5e-05	0.00199199	-1.06337	1.06337	609	gi|258489621|gb|ACV72639.1|	granule-bound starch synthase 1 [Gossypium hirsutum]	1	gi|2833388|sp|Q43784.1|SSG1_MANES	RecName: Full=Granule-bound starch synthase 1, chloroplastic/amyloplastic; AltName: Full=Granule-bound starch synthase I; Short=GBSS-I; Flags: Precursor	0.86	GO:0019252;GO:0010264;GO:0019375;GO:0009501;GO:0009011;GO:0005985;GO:0009507;GO:0001666	3694.estExt_fgenesh4_pg.C_LG_I3141	SubName: Full=Putative uncharacterized protein;	0.8918	COG0297	_	_	K13679	WAXY
Gh_D02G0127	3.0025	1.43799	5e-05	0.00199199	-1.06211	1.06211	1169	gi|590654968|ref|XP_007033852.1|	Uncharacterized protein TCM_019956 [Theobroma cacao]	0.71	_	_	_	GO:0043170;GO:0044238;GO:0005488	_	_	_	_	_	_	None	_
Gh_D12G0846	8.85276	4.25039	5e-05	0.00199199	-1.05853	1.05853	734	gi|590704578|ref|XP_007047197.1|	Transducin/WD40 repeat-like superfamily protein isoform 2 [Theobroma cacao]	0.95	_	_	_	_	39947.LOC_Os09g24260.1	WD domain, G-beta repeat domain containing protein, expressed	0.8437	_	_	NOG82536	None	_
Gh_D11G0318	12.0432	5.78593	5e-05	0.00199199	-1.0576	1.0576	280	gi|645269114|ref|XP_008239848.1|	PREDICTED: (-)-isopiperitenol/(-)-carveol dehydrogenase, mitochondrial-like [Prunus mume]	0.83	gi|75283876|sp|Q5C9I9.1|ISPD_MENPI	RecName: Full=(-)-isopiperitenol/(-)-carveol dehydrogenase, mitochondrial; Flags: Precursor	0.71	GO:0055114;GO:0016491	3694.grail3.0005000301	hypothetical protein	0.7729	COG1028	KOG0725	_	None	_
Gh_A02G1273	70.8133	34.0487	5e-05	0.00199199	-1.05642	1.05642	153	gi|658060252|ref|XP_008365962.1|	PREDICTED: heavy metal-associated isoprenylated plant protein 26-like [Malus domestica]	0.92	gi|75213637|sp|Q9SZN7.1|HIP26_ARATH	RecName: Full=Heavy metal-associated isoprenylated plant protein 26; Short=AtHIPP26; AltName: Full=Farnesylated protein 6; Short=AtFP6; Flags: Precursor [Arabidops	0.72	GO:0046872;GO:0030001	29760.GSVIVG00019438001	SubName: Full=Chromosome chr7 scaffold_20, whole genome shotgun sequence;	0.9205	_	KOG1603	_	None	_
Gh_A12G0237	9.71209	4.67305	0.00065	0.0157825	-1.05542	1.05542	235	gi|590686242|ref|XP_007042321.1|	Maternal effect embryo arrest 14 isoform 1 [Theobroma cacao]	0.89	_	_	_	GO:0009507;GO:0009793	3694.eugene3.00090586	SubName: Full=Putative uncharacterized protein;	0.8077	_	_	NOG265283	None	_
Gh_D02G0093	0.854419	0.411718	0.00125	0.0256779	-1.05329	1.05329	1738	gi|590654499|ref|XP_007033713.1|	LRR and NB-ARC domains-containing disease resistance protein, putative [Theobroma cacao]	0.69	gi|110825741|sp|Q7XA40.2|RGA3_SOLBU	RecName: Full=Putative disease resistance protein RGA3; AltName: Full=Blight resistance protein B149; AltName: Full=RGA1-blb [Solanum bulbocastanum]	0.58	_	_	_	_	_	_	_	None	_
Gh_A09G0003	25.5314	12.3281	5e-05	0.00199199	-1.05032	1.05032	825	gi|590648050|ref|XP_007032068.1|	DEAD/DEAH box helicase [Theobroma cacao]	0.96	gi|3914015|sp|Q55750.1|MFD_SYNY3	RecName: Full=Transcription-repair-coupling factor; Short=TRCF [Synechocystis sp. PCC 6803 substr. Kazusa]	0.7	GO:0016020;GO:0005524;GO:0004386;GO:0016192;GO:0003676;GO:0006783	3694.eugene3.00140919	hypothetical protein	0.9416	COG1197	KOG0344	_	None	_
Gh_D04G0283	6.98403	3.39454	5e-05	0.00199199	-1.04084	1.04084	478	gi|590709005|ref|XP_007048436.1|	Trichome birefringence-like 14 isoform 1 [Theobroma cacao]	0.85	gi|586908189|sp|F4K5L5.1|TBL16_ARATH	RecName: Full=Protein trichome birefringence-like 16 [Arabidopsis thaliana]	0.67	_	_	_	_	_	_	_	None	_
Gh_A09G0276	9.6114	4.68191	5e-05	0.00199199	-1.03765	1.03765	306	gi|590646167|ref|XP_007031547.1|	DNAJ heat shock N-terminal domain-containing protein [Theobroma cacao]	0.83	gi|254777934|sp|B9MJZ0.1|DNAJ_CALBD	RecName: Full=Chaperone protein DnaJ [Caldicellulosiruptor bescii DSM 6725]	0.63	_	29760.GSVIVG00027371001	SubName: Full=Chromosome chr19 scaffold_4, whole genome shotgun sequence;	0.92	COG1141;COG2214;COG0484	KOG0716	_	None	_
Gh_A02G1802	12.4213	6.06591	5e-05	0.00199199	-1.03402	1.03402	591	gi|590619079|ref|XP_007024218.1|	Major facilitator superfamily protein [Theobroma cacao]	0.91	gi|75186219|sp|Q9M817.1|PTR6_ARATH	RecName: Full=Protein NRT1/ PTR FAMILY 1.2; Short=AtNPF1.2; AltName: Full=Nitrate transporter 1.11 [Arabidopsis thaliana]	0.81	GO:0016020;GO:0006810;GO:0005215	29760.GSVIVG00034361001	SubName: Full=Chromosome chr9 scaffold_7, whole genome shotgun sequence;	0.86	COG3104	KOG1237	_	None	_
Gh_A08G2551	9.23973	4.5128	5e-05	0.00199199	-1.03383	1.03383	836	gi|590591693|ref|XP_007017088.1|	Uncharacterized protein TCM_042291 [Theobroma cacao]	0.67	_	_	_	_	_	_	_	_	_	_	None	_
Gh_D13G1220	2.00531	0.979981	0.00255	0.042992	-1.033	1.033	636	gi|359495232|ref|XP_002275828.2|	PREDICTED: uncharacterized protein LOC100263636 [Vitis vinifera]	0.59	_	_	_	_	3694.eugene3.00190673	hypothetical protein	0.7711	_	_	NOG222828	None	_
Gh_Sca039890G01	17.7232	8.71553	0.0019	0.0348344	-1.02398	1.02398	136	gi|590627708|ref|XP_007026516.1|	TRNA synthetase class I (I, L, M and V) family protein isoform 1 [Theobroma cacao]	0.94	gi|549028|sp|P36422.1|SYI_TETTH	RecName: Full=Isoleucine--tRNA ligase; AltName: Full=Isoleucyl-tRNA synthetase; Short=IleRS	0.74	GO:0005524;GO:0002161;GO:0006094;GO:0006096;GO:0009097;GO:0006450;GO:0004822;GO:0009099;GO:0009098;GO:0006428;GO:0005829;GO:0007010;GO:0009651;GO:0010498	_	_	_	_	_	_	K01870	IARS, ileS
Gh_A07G2343	13.8102	6.79301	5e-05	0.00199199	-1.02361	1.02361	593	gi|590574478|ref|XP_007012413.1|	Duplicated homeodomain-like superfamily protein, putative [Theobroma cacao]	0.82	gi|75281803|sp|Q39117.1|TGT2_ARATH	RecName: Full=Trihelix transcription factor GT-2; AltName: Full=Trihelix DNA-binding protein GT-2 [Arabidopsis thaliana]	0.77	GO:0003677;GO:0000785;GO:0003682	3694.eugene3.00061551	hypothetical protein	0.7882	_	KOG4282	_	None	_
Gh_D12G0040	41.526	20.4444	5e-05	0.00199199	-1.02231	1.02231	1172	gi|590717350|ref|XP_007050592.1|	Time for coffee, putative isoform 1 [Theobroma cacao]	0.74	gi|172045840|sp|Q94KE2.2|TIC_ARATH	RecName: Full=Protein TIME FOR COFFEE [Arabidopsis thaliana]	0.51	_	_	_	_	_	_	_	None	_
Gh_A07G1838	26.3916	13.0182	5e-05	0.00199199	-1.01955	1.01955	727	gi|590713987|ref|XP_007049790.1|	WD-repeat protein isoform 1 [Theobroma cacao]	0.93	gi|30580400|sp|Q9FUY2.2|LEUNG_ARATH	RecName: Full=Transcriptional corepressor LEUNIG [Arabidopsis thaliana]	0.76	_	3694.estExt_fgenesh4_pm.C_LG_II1120	hypothetical protein	0.8963	COG2319	KOG0266	_	None	_
Gh_D05G3749	10.7408	5.31197	5e-05	0.00199199	-1.01578	1.01578	1020	gi|590611259|ref|XP_007022051.1|	LRR and NB-ARC domains-containing disease resistance protein, putative [Theobroma cacao]	0.6	gi|46395628|sp|O81825.1|DRL28_ARATH	RecName: Full=Probable disease resistance protein At4g27220 [Arabidopsis thaliana]	0.57	_	_	_	_	_	_	_	None	_
Gh_D05G1569	8.74209	4.3316	0.0002	0.00632409	-1.01308	1.01308	334	gi|543887194|gb|AGV75923.1|	CFE protein [Gossypium hirsutum]	0.99	_	_	_	_	_	_	_	_	_	_	None	_
Gh_A09G0044	27.5567	13.6561	5e-05	0.00199199	-1.01286	1.01286	384	gi|222875436|gb|ACM68924.1|	gibberellin 20-oxidase [Gossypium hirsutum]	0.99	gi|122222383|sp|Q0JH50.1|GAOX2_ORYSJ	RecName: Full=Gibberellin 20 oxidase 2; AltName: Full=GA 20-oxidase 2; AltName: Full=Gibberellin C-20 oxidase 2; AltName: Full=Os20ox2; AltName: Full=Protein semi	0.7	GO:0016706;GO:0005506;GO:0055114	3694.estExt_fgenesh4_pm.C_LG_V0022	gibberellin 20-oxidase (EC:1.14.11.12)	0.8479	COG3491	KOG0143	_	None	_
Gh_A02G1563	11.0684	5.48518	0.0006	0.014811	-1.01284	1.01284	211	gi|590703895|ref|XP_007047003.1|	Homeobox protein, putative [Theobroma cacao]	0.84	gi|322510138|sp|O23208.3|ATB40_ARATH	RecName: Full=Homeobox-leucine zipper protein ATHB-40; AltName: Full=HD-ZIP protein ATHB-40; AltName: Full=Homeodomain transcription factor ATHB-40	0.82	GO:0005634;GO:0006355;GO:0043565	3694.estExt_fgenesh4_pg.C_570199	hypothetical protein	0.7861	_	KOG0483	_	K09338	HD-ZIP
Gh_A02G1739	27.8327	13.8109	5e-05	0.00199199	-1.01097	1.01097	587	gi|590595305|ref|XP_007018019.1|	Starch branching enzyme 2.2 isoform 1 [Theobroma cacao]	0.93	gi|1169912|sp|P30924.2|GLGB_SOLTU	RecName: Full=1,4-alpha-glucan-branching enzyme; AltName: Full=Q-enzyme; AltName: Full=Starch-branching enzyme [Solanum tuberosum]	0.91	GO:0043169;GO:0005978;GO:0004553;GO:0005982;GO:0003844;GO:0005985	29760.GSVIVG00015571001	SubName: Full=Chromosome chr18 scaffold_1, whole genome shotgun sequence;	0.9416	COG0296	KOG0470	_	K00700	glgB
Gh_A02G1671	10.8258	5.37338	5e-05	0.00199199	-1.01057	1.01057	945	gi|590702278|ref|XP_007046584.1|	DNA-directed RNA polymerase II subunit RPB1 isoform 1 [Theobroma cacao]	0.99	gi|322510106|sp|P18616.3|NRPB1_ARATH	RecName: Full=DNA-directed RNA polymerase II subunit 1; AltName: Full=DNA-directed RNA polymerase II subunit RPB1; Short=DNA polymerase II subunit B1; AltName: Fu	0.95	GO:0005665;GO:0003899;GO:0003677;GO:0005730;GO:0006144;GO:0006206;GO:0006366	4558.Sb07g003680.1	hypothetical protein	0.9501	COG0086	KOG0260	_	K03006	RPB1, POLR2A
Gh_D11G2376	12.0312	5.97178	5e-05	0.00199199	-1.01055	1.01055	283	gi|590640646|ref|XP_007030009.1|	Uncharacterized protein isoform 1 [Theobroma cacao]	0.81	gi|347595629|sp|Q556I2.2|AEDO_DICDI	RecName: Full=Probable 2-aminoethanethiol dioxygenase; AltName: Full=Cysteamine dioxygenase [Dictyostelium discoideum]	0.49	GO:0019530;GO:0047800;GO:0055114	3694.fgenesh4_pg.C_LG_XIX000449	hypothetical protein	0.7696	_	KOG4281	_	K10712	ADO
Gh_D04G0560	2.52824	1.25547	0.00035	0.00983058	-1.00991	1.00991	840	gi|590646592|ref|XP_007031665.1|	Uncharacterized protein TCM_017020 [Theobroma cacao]	0.87	_	_	_	GO:0043621	3694.estExt_fgenesh4_pg.C_LG_XVII0245	hypothetical protein	0.8388	_	_	NOG244963	None	_
Gh_A05G3807	76.2192	37.8554	5e-05	0.00199199	-1.00966	1.00966	802	gi|590595327|ref|XP_007018025.1|	BTB/POZ domain-containing protein isoform 1 [Theobroma cacao]	0.91	gi|75246041|sp|Q8LEV3.1|Y2060_ARATH	RecName: Full=BTB/POZ domain-containing protein At2g30600 [Arabidopsis thaliana]	0.79	_	29760.GSVIVG00002879001	SubName: Full=Chromosome chr18 scaffold_137, whole genome shotgun sequence;	0.8468	_	KOG4441;KOG4276	_	None	_
Gh_A13G0294	1052.78	524.386	5e-05	0.00199199	-1.0055	1.0055	168	gi|211906474|gb|ACJ11730.1|	glycine-rich RNA-binding protein [Gossypium hirsutum]	1	gi|1346180|sp|P49310.1|GRP1_SINAL	RecName: Full=Glycine-rich RNA-binding protein GRP1A	0.74	GO:0000166;GO:0003676	39947.LOC_Os12g43600.1	RNA recognition motif containing protein, expressed	0.9351	COG0724	KOG0118	_	None	_
Gh_A03G0037	2.74585	1.37117	5e-05	0.00199199	-1.00185	1.00185	4204	gi|590676054|ref|XP_007039626.1|	Pleckstrin (PH) domain-containing protein isoform 3 [Theobroma cacao]	0.9	gi|613504586|sp|Q5THJ4.2|VP13D_HUMAN	RecName: Full=Vacuolar protein sorting-associated protein 13D [Homo sapiens]	0.56	_	3702.AT4G17140.2-P	unknown protein; FUNCTIONS IN: molecular_function unknown; INVOLVED IN: biological_process u [...]	0.7797	_	KOG1809	_	None	_
Gh_A10G2120	1.8275	0	5e-05	0.00199199	-0.869871	0.869871	105	gi|643738960|gb|KDP44774.1|	hypothetical protein JCGZ_01274 [Jatropha curcas]	0.87	gi|75096964|sp|O04211.1|ELF4_ARATH	RecName: Full=Protein EARLY FLOWERING 4; AltName: Full=Protein ARRHYTHMIC 44 [Arabidopsis thaliana]	0.78	GO:0009909;GO:0042753;GO:0009649;GO:0042803;GO:0010114;GO:0048573	29760.GSVIVG00029290001	SubName: Full=Chromosome chr13 scaffold_48, whole genome shotgun sequence;	0.8721	_	_	NOG295435	None	_
Gh_D10G2646	1.67324	0	0.0004	0.0108938	-0.742644	0.742644	105	gi|590646103|ref|XP_007031529.1|	S-adenosyl-L-methionine-dependent methyltransferases superfamily protein [Theobroma cacao]	0.76	_	_	_	GO:0008168;GO:0032259	_	_	_	_	_	_	None	_
Gh_A10G2300	1.23573	0	0.00235	0.0406241	-0.305364	0.305364	105	gi|255552019|ref|XP_002517054.1|	calmodulin, putative [Ricinus calmodulin, putative [Ricinus communis]	0.9	gi|75318109|sp|O23320.1|CML8_ARATH	RecName: Full=Calmodulin-like protein 8; Short=AtCaM-8 [Arabidopsis thaliana]	0.9	GO:0032440;GO:0005509;GO:0055114	29760.GSVIVG00020094001	SubName: Full=Putative uncharacterized protein (Chromosome chr5 scaffold_2, whole genome sho [...]	0.901	COG5126	KOG0027	_	K13448	CML
Gh_A12G1233	0	1.00714	0.0008	0.018462	0.0102642	-0.0102642	130	gi|590689875|ref|XP_007043351.1|	B-box type zinc finger family protein, putative [Theobroma cacao]	0.83	gi|52839876|sp|Q9C9A9.1|COL7_ARATH	RecName: Full=Zinc finger protein CONSTANS-LIKE 7 [Arabidopsis thaliana]	0.68	GO:0005622;GO:0008270	3694.eugene3.00070251	hypothetical protein	0.76	_	_	NOG240028	None	_
Gh_Sca007624G01	0	1.01318	0.0006	0.014811	0.0188905	-0.0188905	131	gi|667751904|gb|AIG89991.1|	hypothetical protein (mitochondrion) [Capsicum annuum]	0.95	_	_	_	GO:0005739	_	_	_	_	_	_	None	_
Gh_A05G2854	0	1.04824	0.0001	0.00360715	0.0679691	-0.0679691	138	gi|91208934|ref|YP_538969.1|	ribosomal protein S11 [Gossypium ribosomal protein S11 [Gossypium barbadense]	0.99	gi|91207752|sp|Q2L937.1|RR11_GOSHI	RecName: Full=30S ribosomal protein S11, chloroplastic (chloroplast) [Gossypium hirsutum]	0.99	GO:0005840;GO:0042254;GO:0006412;GO:0003735;GO:0019843;GO:0009507	29760.GSVIVG00012662001	RecName: Full=30S ribosomal protein S11, chloroplastic;	0.9741	COG0100	KOG0408	_	K02948	RP-S11, MRPS11, rpsK
Gh_A03G0516	0	1.06111	0.0002	0.00632409	0.0855742	-0.0855742	140	gi|590671553|ref|XP_007038363.1|	NAD(P)-linked oxidoreductase superfamily protein [Theobroma cacao]	0.93	gi|122241485|sp|Q0PGJ6.1|AKRC9_ARATH	RecName: Full=Aldo-keto reductase family 4 member C9 [Arabidopsis thaliana]	0.66	GO:0055114;GO:0016491	_	_	_	_	_	_	None	_
Gh_D05G3189	0	1.08116	5e-05	0.00199199	0.11258	-0.11258	240	gi|590613060|ref|XP_007022558.1|	Uncharacterized protein isoform 1 [Theobroma cacao]	0.77	_	_	_	_	_	_	_	_	_	_	None	_
Gh_D09G0638	0	1.12157	5e-05	0.00199199	0.16552	-0.16552	156	gi|590661803|ref|XP_007035774.1|	Basic leucine-zipper 1, putative [Theobroma cacao]	0.75	gi|75309069|sp|Q9FGX2.1|BZIP1_ARATH	RecName: Full=Basic leucine zipper 1; Short=AtbZIP1; Short=bZIP protein 1 [Arabidopsis thaliana]	0.74	GO:0007165;GO:0006970;GO:0006355;GO:0005488;GO:0071310	_	_	_	_	_	_	None	_
Gh_A09G0637	0	1.13481	5e-05	0.00199199	0.182451	-0.182451	156	gi|590661803|ref|XP_007035774.1|	Basic leucine-zipper 1, putative [Theobroma cacao]	0.75	gi|75309069|sp|Q9FGX2.1|BZIP1_ARATH	RecName: Full=Basic leucine zipper 1; Short=AtbZIP1; Short=bZIP protein 1 [Arabidopsis thaliana]	0.73	GO:0007165;GO:0006970;GO:0006355;GO:0005488;GO:0071310	_	_	_	_	_	_	None	_
Gh_D07G1918	0	1.20894	0.0012	0.0249221	0.273743	-0.273743	108	gi|590711961|ref|XP_007049254.1|	Uncharacterized protein TCM_002274 [Theobroma cacao]	0.87	_	_	_	_	_	_	_	_	_	_	None	_
Gh_A02G0544	0	1.26201	0.0014	0.0279147	0.335723	-0.335723	107	_	_	_	_	_	_	_	_	_	_	_	_	_	None	_
Gh_A05G2833	0	1.28189	0.0001	0.00360715	0.358272	-0.358272	124	gi|253760055|ref|XP_002488965.1|	hypothetical protein SORBIDRAFT_1138s002030 [Sorghum bicolor]	0.85	_	_	_	_	4558.Sb1138s002030.1	hypothetical protein	0.8469	_	_	NOG252044	None	_
Gh_D04G0352	0	1.30813	0.00045	0.0119291	0.387506	-0.387506	113	gi|590712302|ref|XP_007049351.1|	Uncharacterized protein TCM_002397 [Theobroma cacao]	0.58	_	_	_	_	_	_	_	_	_	_	None	_
Gh_Sca010765G03	0	1.31895	5e-05	0.00199199	0.39939	-0.39939	151	gi|570759006|ref|YP_008992589.1|	ribosomal protein L22 (chloroplast) [Gossypium bickii]	1	gi|125987556|sp|A0ZZ74.1|RK22_GOSBA	RecName: Full=50S ribosomal protein L22, chloroplastic	0.99	GO:0042254;GO:0015934;GO:0006412;GO:0003735;GO:0019843;GO:0009507	3694.gw1.3415.10.1	50S ribosomal protein L22 ; This protein binds specifically to 23S rRNA (By similarity)	0.84	COG0091	KOG1711	_	K02890	RP-L22, MRPL22, rplV
Gh_A05G3593	0	1.35695	0.00315	0.0498782	0.440368	-0.440368	97	gi|590673865|ref|XP_007039007.1|	NADH-dependent glutamate synthase 1 isoform 1 [Theobroma cacao]	0.88	gi|417073|sp|Q03460.1|GLSN_MEDSA	RecName: Full=Glutamate synthase [NADH]	0.83	GO:0005506;GO:0006094;GO:0006096;GO:0050660;GO:0006537;GO:0006118;GO:0051536;GO:0055114;GO:0016040;GO:0010181;GO:0009651;GO:0048589;GO:0019676;GO:0009570	_	_	_	_	_	_	K00264	GLT1
Gh_Sca090765G01	0	1.41352	0.00315	0.0498782	0.499292	-0.499292	100	gi|590679400|ref|XP_007040570.1|	Electron transporter, putative [Theobroma cacao]	0.92	gi|75171457|sp|Q9FLE8.1|Y5986_ARATH	RecName: Full=Uncharacterized protein At5g39865 [Arabidopsis thaliana]	0.71	GO:0015035;GO:0048653;GO:0009055;GO:0009902;GO:0006118;GO:0055114;GO:0045454;GO:0005884;GO:0051017	_	_	_	_	_	_	K17479	GRXCR1
Gh_A07G1658	0	1.42651	5e-05	0.00199199	0.51249	-0.51249	131	gi|565396033|ref|XP_006363638.1|	PREDICTED: uncharacterized protein LOC102601005 [Solanum tuberosum]	0.89	_	_	_	_	4558.Sb1138s002030.1	hypothetical protein	0.8772	_	_	NOG252044	None	_
Gh_A12G2091	0	1.57277	5e-05	0.00199199	0.653308	-0.653308	138	gi|91208934|ref|YP_538969.1|	ribosomal protein S11 [Gossypium ribosomal protein S11 [Gossypium barbadense]	0.99	gi|91207752|sp|Q2L937.1|RR11_GOSHI	RecName: Full=30S ribosomal protein S11, chloroplastic (chloroplast) [Gossypium hirsutum]	0.99	GO:0005840;GO:0042254;GO:0006412;GO:0003735;GO:0019843;GO:0009507	29760.GSVIVG00012662001	RecName: Full=30S ribosomal protein S11, chloroplastic;	0.9828	COG0100	KOG0408	_	K02948	RP-S11, MRPS11, rpsK
Gh_Sca004940G02	0	1.58764	5e-05	0.00199199	0.666884	-0.666884	124	gi|253760055|ref|XP_002488965.1|	hypothetical protein SORBIDRAFT_1138s002030 [Sorghum bicolor]	0.85	_	_	_	_	39947.LOC_Os09g01000.1	expressed protein	0.8571	_	_	NOG252044	None	_
Gh_D07G1433	0	1.61508	5e-05	0.00199199	0.691606	-0.691606	290	gi|590722382|ref|XP_007051879.1|	NAD(P)-binding Rossmann-fold superfamily protein, putative [Theobroma cacao]	0.82	gi|75315919|sp|Q9ZUH5.1|SDR2B_ARATH	RecName: Full=Short-chain dehydrogenase/reductase 2b; Short=AtSDR2b [Arabidopsis thaliana]	0.67	GO:0055114;GO:0016491	3694.gw1.1628.2.1	hypothetical protein	0.7509	_	KOG1208	_	K15095	E1.1.1.208
Gh_A01G0565	0	1.83914	5e-05	0.00199199	0.879031	-0.879031	128	gi|590607798|ref|XP_007021088.1|	Thioredoxin [Theobroma cacao]	0.87	gi|51702018|sp|Q8LDI5.2|CXXS1_ARATH	RecName: Full=Thioredoxin-like protein CXXS1; Short=AtCXXS1; AltName: Full=Mono-cysteine thioredoxin 1 [Arabidopsis thaliana]	0.79	GO:0015035;GO:0006457;GO:0006118;GO:0006661;GO:0055114;GO:0045454;GO:0006662;GO:0005829;GO:0003756	3694.grail3.0093003601	thioredoxin-like protein	0.8214	COG0526	KOG0907	_	K03671	trxA
Gh_D05G2482	2.84983	5.70363	5e-05	0.00199199	1.001	-1.001	604	gi|590592973|ref|XP_007017431.1|	Exocyst complex component sec3A isoform 1 [Theobroma cacao]	0.81	gi|75213194|sp|Q9SX85.1|SEC3A_ARATH	RecName: Full=Exocyst complex component SEC3A; Short=AtSec3a [Arabidopsis thaliana]	0.79	_	29760.GSVIVG00014702001	SubName: Full=Chromosome chr18 scaffold_1, whole genome shotgun sequence;	0.8296	_	KOG2148	_	None	_
Gh_D04G1218	5.193	10.3984	0.0015	0.0294002	1.00172	-1.00172	217	gi|590628880|ref|XP_007026837.1|	RING/FYVE/PHD zinc finger superfamily protein [Theobroma cacao]	0.86	_	_	_	GO:0008270	3694.grail3.0023024502	hypothetical protein	0.7534	_	KOG1609	_	None	_
Gh_A03G0164	11.9234	23.9086	5e-05	0.00199199	1.00373	-1.00373	698	gi|590678564|ref|XP_007040338.1|	Heat shock protein 90.1 [Theobroma cacao]	0.98	gi|1708314|sp|P51819.1|HSP83_IPONI	RecName: Full=Heat shock protein 83 [Ipomoea nil]	0.96	GO:0006457;GO:0005524;GO:0051082;GO:0006950	59689.fgenesh2_kg.8__1504__AT5G56030.1	annotation not avaliable	0.8523	COG0326	KOG0019	_	K04079	htpG, HSP90A
Gh_D12G2084	9.97575	20.0889	0.00075	0.0176045	1.0099	-1.0099	146	gi|590675741|ref|XP_007039533.1|	Lsd one like 1 isoform 1 [Theobroma cacao]	0.98	gi|75163743|sp|Q93ZB1.1|LOL1_ARATH	RecName: Full=Protein LOL1; AltName: Full=Protein LSD ONE LIKE 1; Short=AtLOL1; AltName: Full=Putative zinc finger LOL1 [Arabidopsis thaliana]	0.88	_	59689.fgenesh2_kg.1__3399__AT1G32540.3	annotation not avaliable	0.8831	_	_	NOG287476	None	_
Gh_A06G1090	2.55389	5.15341	5e-05	0.00199199	1.01283	-1.01283	598	gi|590625143|ref|XP_007025801.1|	NAD(P)H dehydrogenase B2 isoform 1 [Theobroma cacao]	0.95	gi|75332084|sp|Q94BV7.1|NDB2_ARATH	RecName: Full=External alternative NAD(P)H-ubiquinone oxidoreductase B2, mitochondrial; AltName: Full=External alternative NADH dehydrogenase NDB2; AltName: Full=NA	0.86	GO:0006120;GO:0005509;GO:0006744;GO:0050660;GO:0015992;GO:0006814;GO:0008137	29760.GSVIVG00009744001	SubName: Full=Chromosome undetermined scaffold_247, whole genome shotgun sequence;	0.8947	COG1252	KOG2495	_	K17871	ndh1
Gh_A05G3731	7.64655	15.4348	0.00035	0.00983058	1.01331	-1.01331	198	gi|188509926|gb|ACD56615.1|	predicted protein [Gossypioides kirkii]	0.78	_	_	_	_	_	_	_	_	_	_	None	_
Gh_D12G0445	5.19775	10.5363	0.0025	0.04239	1.01941	-1.01941	188	gi|590681167|ref|XP_007041033.1|	VQ motif-containing protein, putative [Theobroma cacao]	0.72	_	_	_	_	_	_	_	_	_	_	None	_
Gh_D01G0964	8.69124	17.6886	5e-05	0.00199199	1.02519	-1.02519	385	gi|255538804|ref|XP_002510467.1|	Auxin-induced protein 5NG4, putative [Ricinus communis]	0.95	gi|75165000|sp|Q94AP3.1|WAT1_ARATH	RecName: Full=Protein WALLS ARE THIN 1 [Arabidopsis thaliana]	0.86	GO:0006833;GO:0000271;GO:0048767;GO:0009705;GO:0007389;GO:0009926;GO:0016021;GO:0009651;GO:0071555;GO:0090358;GO:0005886;GO:0009834;GO:0055085;GO:0008361;GO:0090355;GO:0009750;GO:0010075;GO:0009932;GO:0009825;GO:0043481;GO:0022857	3694.estExt_fgenesh4_pg.C_LG_II0267	SubName: Full=Putative uncharacterized protein;	0.9219	_	_	NOG242902	None	_
Gh_A01G1740	3.66635	7.46209	0.001	0.0217966	1.02524	-1.02524	274	gi|89258498|gb|ABD65462.1|	short chain alcohol dehydrogenase [Gossypium hirsutum]	0.91	gi|75306651|sp|Q94KL7.1|SILD_FORIN	RecName: Full=Secoisolariciresinol dehydrogenase	0.73	GO:0055114;GO:0016491	3694.eugene3.00160676	hypothetical protein	0.83	COG1028	KOG0725	_	None	_
Gh_A04G0207	0.794087	1.61927	0.00275	0.0453998	1.02797	-1.02797	808	gi|590608287|ref|XP_007021222.1|	Serine/threonine kinases,protein kinases,ATP binding,sugar binding,kinases,carbohydrate binding, putative isoform 1 [Theobroma cacao]	0.89	gi|322510091|sp|Q9ZR08.3|Y4230_ARATH	RecName: Full=G-type lectin S-receptor-like serine/threonine-protein kinase At4g03230; Flags: Precursor [Arabidopsis thaliana]	0.75	GO:0005524;GO:0004672;GO:0006468;GO:0048544	29760.GSVIVG00027533001	SubName: Full=Chromosome chr19 scaffold_4, whole genome shotgun sequence;	0.8571	COG0515	KOG1187	_	None	_
Gh_A05G1233	27.7915	56.8146	5e-05	0.00199199	1.03162	-1.03162	135	gi|590622342|ref|XP_007025024.1|	Glutaredoxin family protein, partial [Theobroma cacao]	0.94	gi|75142699|sp|Q7XIZ1.1|GRXC9_ORYSJ	RecName: Full=Glutaredoxin-C9 [Oryza sativa Japonica Group]	0.72	GO:0015035;GO:0009055;GO:0005623;GO:0006118;GO:0055114;GO:0045454	29760.GSVIVG00028333001	SubName: Full=Chromosome chr10 scaffold_43, whole genome shotgun sequence;	0.8585	_	KOG1752	_	None	_
Gh_D05G2607	7.01184	14.3914	5e-05	0.00199199	1.03734	-1.03734	284	gi|148645857|gb|ABR01221.1|	MYB8 [Gossypium hirsutum]	1	gi|75107030|sp|P81395.1|MYB30_ANTMA	RecName: Full=Myb-related protein 330	0.92	GO:0003677;GO:0000785;GO:0003682	3694.eugene3.00190735	hypothetical protein	0.9804	COG5147	KOG0048	_	K09422	MYBP
Gh_D08G0057	211.864	436.256	5e-05	0.00199199	1.04204	-1.04204	153	gi|159138937|gb|ABW89468.1|	low molecular weight heat shock protein [Gossypium hirsutum]	1	gi|123534|sp|P02519.1|HSP11_SOYBN	RecName: Full=17.3 kDa class I heat shock protein; AltName: Full=HSP 17.3 [Glycine max]	0.9	_	3694.grail3.0066002801	hypothetical protein	0.9619	COG0071	KOG0710	_	K13993	HSP20
Gh_A11G2570	4.41692	9.108	5e-05	0.00199199	1.04409	-1.04409	933	gi|641843598|gb|KDO62497.1|	hypothetical protein CISIN_1g002736mg [Citrus sinensis]	0.84	gi|75332075|sp|Q94BM7.1|SPA4_ARATH	RecName: Full=Protein SPA1-RELATED 4 [Arabidopsis thaliana]	0.74	GO:0005524;GO:0004672;GO:0006468	29760.GSVIVG00018595001	SubName: Full=Chromosome chr12 scaffold_18, whole genome shotgun sequence;	0.8915	COG2319	KOG1033;KOG0266	_	None	_
Gh_D04G1312	6.22507	12.8407	0.00085	0.0193303	1.04456	-1.04456	176	gi|590627944|ref|XP_007026585.1|	Brassinosteroid signaling positive regulator family protein [Theobroma cacao]	0.85	gi|75112573|sp|Q5Z9E5.1|BZR3_ORYSJ	RecName: Full=Protein BZR1 homolog 3; Short=OsBZR3; AltName: Full=Protein BRASSINAZOLE-RESISTANT 1 homolog 3 [Oryza sativa Japonica Group]	0.73	_	3694.fgenesh4_pg.C_LG_XVI001161	hypothetical protein	0.828	_	_	NOG259392	None	_
Gh_A07G0597	38.4707	79.5235	5e-05	0.00199199	1.04762	-1.04762	209	gi|590667956|ref|XP_007037358.1|	RNA-binding family protein with retrovirus zinc finger-like domain isoform 1 [Theobroma cacao]	0.9	gi|1346181|sp|P49311.1|GRP2_SINAL	RecName: Full=Glycine-rich RNA-binding protein GRP2A	0.59	GO:0005634;GO:0000166;GO:0005829;GO:0008270;GO:0009631;GO:0003676	29760.GSVIVG00002259001	SubName: Full=Chromosome undetermined scaffold_129, whole genome shotgun sequence;	0.9024	COG0724	KOG0118	_	K12885	RBMX, HNRNPG
Gh_A10G1567	6.00711	12.4181	0.0002	0.00632409	1.0477	-1.0477	219	gi|672116094|ref|XP_008781199.1|	PREDICTED: 1-Cys peroxiredoxin [Phoenix dactylifera]	0.89	gi|75323225|sp|Q6E2Z6.1|REHY_MEDTR	RecName: Full=1-Cys peroxiredoxin; AltName: Full=Rehydrin homolog; AltName: Full=Thioredoxin peroxidase	0.88	GO:0006979;GO:0006804;GO:0004601;GO:0055114;GO:0051920	29760.GSVIVG00019700001	SubName: Full=Chromosome chr5 scaffold_2, whole genome shotgun sequence;	0.8813	COG0450	KOG0854	_	K11188	PRDX6
Gh_A10G1188	20.9051	43.2384	5e-05	0.00199199	1.04846	-1.04846	166	gi|590655761|ref|XP_007034078.1|	Ribosomal protein L12/ ATP-dependent Clp protease adaptor protein ClpS family protein [Theobroma cacao]	0.88	_	_	_	GO:0005840;GO:0008233;GO:0006508;GO:0030163	3694.estExt_fgenesh4_pg.C_LG_X0879	hypothetical protein	0.9459	COG2127	_	NOG271436;NOG287859	None	_
Gh_D08G1434	2.32989	4.82438	0.00105	0.0226083	1.05008	-1.05008	352	gi|470142310|ref|XP_004306854.1|	PREDICTED: UDP-galactose/UDP-glucose transporter 4-like [Fragaria vesca subsp. vesca]	0.92	gi|122196665|sp|Q29Q28.1|UTR2_ARATH	RecName: Full=UDP-galactose/UDP-glucose transporter 2; Short=AtUTr2 [Arabidopsis thaliana]	0.89	GO:0008643;GO:0055085;GO:0016021	29760.GSVIVG00026335001	SubName: Full=Chromosome chr15 scaffold_37, whole genome shotgun sequence;	0.8937	COG0697	KOG1582	_	K15277	SLC35B3, PAPST2
Gh_A09G2368	6.8681	14.2432	5e-05	0.00199199	1.05229	-1.05229	608	gi|590675064|ref|XP_007039341.1|	UDP-Glycosyltransferase superfamily protein isoform 1 [Theobroma cacao]	0.91	gi|6136121|sp|O82627.1|SSG1_ANTMA	RecName: Full=Granule-bound starch synthase 1, chloroplastic/amyloplastic; AltName: Full=Granule-bound starch synthase I; Short=GBSS-I; Flags: Precursor	0.84	GO:0019252;GO:0010264;GO:0019375;GO:0009501;GO:0009011;GO:0005985;GO:0009507;GO:0001666	3702.AT1G32900.1-P	starch synthase, putative; starch synthase, putative; FUNCTIONS IN: transferase activity, tr [...]	0.8912	COG0297	_	_	K13679	WAXY
Gh_D05G1512	14.6134	30.3449	5e-05	0.00199199	1.05416	-1.05416	344	gi|590624217|ref|XP_007025544.1|	DNAJ heat shock family protein [Theobroma cacao]	0.95	gi|13124719|sp|Q24133.3|DNAJ1_DROME	RecName: Full=DnaJ protein homolog 1; Short=DROJ1 [Drosophila melanogaster]	0.61	GO:0006457;GO:0051082	29760.GSVIVG00003050001	SubName: Full=Chromosome chr10 scaffold_138, whole genome shotgun sequence;	0.9472	COG0484	KOG0714	_	K09510	DNAJB4
Gh_D01G1550	2.18326	4.53559	0.00045	0.0119291	1.05481	-1.05481	458	gi|590694887|ref|XP_007044737.1|	Alpha/beta-Hydrolases superfamily protein isoform 1 [Theobroma cacao]	0.93	gi|126334|sp|P04635.1|LIP_STAHY	RecName: Full=Lipase; AltName: Full=Triacylglycerol lipase; Contains: RecName: Full=Lipase 86 kDa form; Contains: RecName: Full=Lipase 46 kDa form; Flags: Precursor [S	0.71	GO:0016787;GO:0008152	29760.GSVIVG00013574001	SubName: Full=Chromosome undetermined scaffold_504, whole genome shotgun sequence;	0.9215	COG1075	_	_	None	_
Gh_D07G0690	73.0626	152.005	5e-05	0.00199199	1.05691	-1.05691	208	gi|320090070|gb|ADW08704.1|	heat shock protein [Gossypium hirsutum]	0.97	gi|123544|sp|P05478.1|HSP16_SOYBN	RecName: Full=18.5 kDa class I heat shock protein; AltName: Full=HSP 18.5	0.87	_	3694.grail3.0066002801	hypothetical protein	0.9714	COG0071	KOG0710	_	K13993	HSP20
Gh_A08G0996	10.0392	20.8988	0.0014	0.0279147	1.05778	-1.05778	118	gi|590678564|ref|XP_007040338.1|	Heat shock protein 90.1 [Theobroma cacao]	0.95	gi|547684|sp|P36182.1|HSP82_TOBAC	RecName: Full=Heat shock protein 82	0.95	GO:0006457;GO:0005524;GO:0051082;GO:0006950	29760.GSVIVG00037730001	SubName: Full=Chromosome undetermined scaffold_91, whole genome shotgun sequence;	0.9412	COG0326	KOG0019	_	K04079	htpG, HSP90A
Gh_D08G0066	1.33426	2.78134	0.00055	0.0138713	1.05974	-1.05974	666	gi|590587887|ref|XP_007016084.1|	Zinc finger family protein [Theobroma cacao]	0.83	gi|75311611|sp|Q9LUZ4.1|C3H66_ARATH	RecName: Full=Zinc finger CCCH domain-containing protein 66; Short=AtC3H66 [Arabidopsis thaliana]	0.78	GO:0046872	3694.fgenesh4_pg.C_LG_I001626	hypothetical protein	0.7652	_	KOG1595	_	None	_
Gh_D08G0499	6.09282	12.7065	0.00015	0.00504383	1.06038	-1.06038	242	gi|590716973|ref|XP_007050515.1|	Bax inhibitor-1 family protein [Theobroma cacao]	0.98	gi|75164899|sp|Q94A20.1|BI1L_ARATH	RecName: Full=BI1-like protein [Arabidopsis thaliana]	0.71	GO:0016021	29760.GSVIVG00023775001	SubName: Full=Chromosome chr7 scaffold_31, whole genome shotgun sequence;	0.9571	COG0670	KOG2322	_	K06890	K06890
Gh_D07G0689	34.0726	71.113	5e-05	0.00199199	1.0615	-1.0615	913	gi|590668615|ref|XP_007037544.1|	Heat shock protein 101 [Theobroma cacao]	0.98	gi|21264430|sp|P42730.2|CLPB1_ARATH	RecName: Full=Chaperone protein ClpB1; AltName: Full=ATP-dependent Clp protease ATP-binding subunit ClpB homolog 1; AltName: Full=Casein lytic proteinase B1; AltNa	0.96	GO:0005524;GO:0019538	29760.GSVIVG00016219001	SubName: Full=Chromosome chr17 scaffold_12, whole genome shotgun sequence;	0.9564	COG0542	KOG1051	_	K03695	clpB
Gh_D07G0374	3.48046	7.32563	0.00135	0.0272165	1.07367	-1.07367	235	gi|656991630|gb|AID21717.1|	auxin-responsive IAA29-like protein [Gossypium hirsutum]	1	gi|46395937|sp|Q93WC4.2|IAA29_ARATH	RecName: Full=Auxin-responsive protein IAA29; AltName: Full=Indoleacetic acid-induced protein 29 [Arabidopsis thaliana]	0.62	GO:0050794;GO:0009733;GO:0006351	_	_	_	_	_	_	K14484	IAA
Gh_D13G1609	2.99064	6.30078	0.0005	0.0129405	1.07508	-1.07508	332	gi|340796359|gb|AEK70418.1|	GA2ox2 [Gossypium hirsutum]	1	gi|49035759|sp|Q9SQ80.1|G2OX1_PEA	RecName: Full=Gibberellin 2-beta-dioxygenase 1; AltName: Full=GA 2-oxidase 1; AltName: Full=Gibberellin 2-beta-hydroxylase 1; AltName: Full=Gibberellin 2-oxidase 1;	0.82	_	3694.eugene3.00012757	hypothetical protein	0.875	COG3491	KOG0143	_	K04125	E1.14.11.13
Gh_D12G0299	2.22901	4.70073	0.00055	0.0138713	1.07648	-1.07648	396	gi|590684827|ref|XP_007041944.1|	Chalcone and stilbene synthase family protein [Theobroma cacao]	0.95	gi|116385|sp|P08894.1|CHSA_PETHY	RecName: Full=Chalcone synthase A; AltName: Full=Naringenin-chalcone synthase A	0.64	GO:0030639;GO:0090439;GO:0005783;GO:0016210;GO:0009813;GO:0080110	3694.eugene3.00041296	chs-like protein	0.9189	COG3424	_	_	None	_
Gh_D10G1339	0.739797	1.56135	0.00155	0.0301162	1.07759	-1.07759	846	gi|590656105|ref|XP_007034174.1|	Uncharacterized protein TCM_020195 [Theobroma cacao]	0.75	_	_	_	GO:1902589;GO:0048507;GO:0006342;GO:0003002;GO:0031047;GO:0048438;GO:0048827;GO:0016569;GO:0048449	_	_	_	_	_	_	None	_
Gh_D07G0339	1.09749	2.31675	0.0003	0.00871602	1.07789	-1.07789	978	gi|590571612|ref|XP_007011642.1|	Glutamate receptor, putative [Theobroma cacao]	0.86	gi|41017226|sp|Q9C5V5.2|GLR28_ARATH	RecName: Full=Glutamate receptor 2.8; AltName: Full=Ligand-gated ion channel 2.8; Flags: Precursor [Arabidopsis thaliana]	0.71	GO:0035235;GO:0007268;GO:0016021;GO:0004970;GO:0006811	3694.gw1.XVIII.2113.1	glutamate-gated kainate-type ion channel receptor subunit GluR5	0.7842	_	KOG1052	_	K05387	GRIP
Gh_D06G0587	2.44852	5.17765	0.00285	0.0464595	1.08039	-1.08039	275	gi|225445264|ref|XP_002281082.1|	PREDICTED: uncharacterized protein LOC100247556 [Vitis vinifera]	0.57	_	_	_	_	_	_	_	_	_	_	None	_
Gh_A12G0442	4.00327	8.46865	0.0013	0.0264396	1.08095	-1.08095	206	gi|590681167|ref|XP_007041033.1|	VQ motif-containing protein, putative [Theobroma cacao]	0.7	_	_	_	_	_	_	_	_	_	_	None	_
Gh_D08G2541	34.9436	74.0536	5e-05	0.00199199	1.08354	-1.08354	353	gi|590576405|ref|XP_007012951.1|	Zinc finger C-x8-C-x5-C-x3-H type family protein, putative [Theobroma cacao]	0.88	gi|75264518|sp|Q9M0G2.1|C3H49_ARATH	RecName: Full=Zinc finger CCCH domain-containing protein 49; Short=AtC3H49 [Arabidopsis thaliana]	0.84	GO:0046872	_	_	_	_	_	_	None	_
Gh_A12G2487	3.60961	7.68267	0.0002	0.00632409	1.08976	-1.08976	297	gi|590663525|ref|XP_007036244.1|	SKP1/ASK-interacting protein 16 isoform 1 [Theobroma cacao]	0.9	gi|122316746|sp|Q0ASF3.1|APAG_MARMM	RecName: Full=Protein ApaG [Maricaulis maris MCS10]	0.61	_	3694.eugene3.00150571	hypothetical protein	0.958	COG2967	KOG4408	_	None	_
Gh_D10G1484	5.86305	12.4865	5e-05	0.00199199	1.09065	-1.09065	332	gi|590658637|ref|XP_007034910.1|	S-adenosyl-L-methionine-dependent methyltransferases superfamily protein [Theobroma cacao]	0.95	gi|75335638|sp|Q9LY74.1|BQMT_ARATH	RecName: Full=2-methyl-6-phytyl-1,4-hydroquinone methyltransferase, chloroplastic; AltName: Full=37 kDa inner envelope membrane protein; Short=E37; AltName: Full=MP	0.88	GO:0008168;GO:0019031;GO:0032259	3694.estExt_fgenesh4_pm.C_LG_VIII0681	MPBQ/MSBQ methyltransferase	0.9842	COG0500	KOG1540	_	K12502	VTE3, APG1
Gh_A04G0538	17.272	36.8372	0.00035	0.00983058	1.09273	-1.09273	111	gi|590629341|ref|XP_007026962.1|	HLIP/One helix protein [Theobroma cacao]	0.88	gi|75100106|sp|O81208.1|HLIP_ARATH	RecName: Full=High-light-induced protein, chloroplastic; AltName: Full=One helix protein; AltName: Full=Protein PIGMENT DEFECTIVE 335; Flags: Precursor [Arabidopsis	0.71	GO:0009744;GO:0010218;GO:0009637;GO:0010207;GO:0010114;GO:0010155	29760.GSVIVG00021356001	SubName: Full=Chromosome chr8 scaffold_23, whole genome shotgun sequence;	0.9241	_	_	NOG146316	None	_
Gh_A12G1062	24.2546	52.012	5e-05	0.00199199	1.10059	-1.10059	739	gi|590720674|ref|XP_007051395.1|	Homeodomain-like superfamily protein isoform 1 [Theobroma cacao]	0.85	gi|269969425|sp|Q6R0H1.2|LHY_ARATH	RecName: Full=Protein LHY; AltName: Full=MYB-related transcription factor LHY; AltName: Full=Protein LATE ELONGATED HYPOCOTYL [Arabidopsis thaliana]	0.75	GO:0042754;GO:0000785;GO:0009409;GO:0043433;GO:0044212;GO:0048574;GO:0003682;GO:0005667;GO:0045449;GO:0003700;GO:0009639	_	_	_	_	_	_	K12133	LHY
Gh_A08G0020	123.761	265.631	5e-05	0.00199199	1.10187	-1.10187	153	gi|159138937|gb|ABW89468.1|	low molecular weight heat shock protein [Gossypium hirsutum]	0.97	gi|123534|sp|P02519.1|HSP11_SOYBN	RecName: Full=17.3 kDa class I heat shock protein; AltName: Full=HSP 17.3 [Glycine max]	0.88	_	3694.grail3.0066002801	hypothetical protein	0.9619	COG0071	KOG0710	_	K13993	HSP20
Gh_D05G2355	2.54802	5.47477	0.00135	0.0272165	1.10342	-1.10342	293	gi|590727181|ref|XP_007099558.1|	Secretory laccase, putative isoform 1 [Theobroma cacao]	0.86	gi|75318741|sp|O81081.1|LAC2_ARATH	RecName: Full=Laccase-2; AltName: Full=Benzenediol:oxygen oxidoreductase 2; AltName: Full=Diphenol oxidase 2; AltName: Full=Urishiol oxidase 2; Flags: Precursor [Ar	0.54	GO:0005507;GO:0055114;GO:0016491	_	_	_	_	_	_	None	_
Gh_A03G1416	5.39809	11.6019	0.00025	0.00757223	1.10384	-1.10384	227	gi|590690175|ref|XP_007043436.1|	Photosynthetic electron transfer C [Theobroma cacao]	0.94	gi|136707|sp|P26291.1|UCRIA_PEA	RecName: Full=Cytochrome b6-f complex iron-sulfur subunit, chloroplastic; AltName: Full=Plastohydroquinone:plastocyanin oxidoreductase iron-sulfur protein; AltName: Fu	0.87	GO:0051537;GO:0006118;GO:0009534;GO:0042651;GO:0010310;GO:0010207;GO:0009941;GO:0006612;GO:0006364;GO:0009496;GO:0045285;GO:1902600;GO:0006098;GO:0045158;GO:0009867;GO:0009697;GO:0031348;GO:0046028;GO:0009657;GO:0009523;GO:0008121;GO:0009512;GO:0010363;GO:0043900;GO:0006119;GO:0009595;GO:0010200;GO:0016021;GO:0005886;GO:0050832;GO:0000165;GO:0010196;GO:0009862;GO:0009409;GO:0046872;GO:0009767	3694.estExt_fgenesh4_pg.C_LG_XIX1025	SubName: Full=Putative uncharacterized protein;	0.927	COG0723	KOG1671	_	K02636	petC
Gh_A07G0202	96.4686	207.566	5e-05	0.00199199	1.10544	-1.10544	179	gi|77744869|gb|ABB02388.1|	temperature-induced lipocalin' [Gossypium arboreum]	1	gi|71153841|sp|P0A902.1|BLC_ECO57	RecName: Full=Outer membrane lipoprotein Blc; Flags: Precursor [Escherichia coli O157:H7]	0.52	GO:0006810;GO:0005215	29760.GSVIVG00005094001	SubName: Full=Temperature-induced lipocalin (Putative uncharacterized protein) (Chromosome u [...]	0.85	COG3040	KOG4824	_	K03098	APOD
Gh_D05G2226	2.73101	5.87791	5e-05	0.00199199	1.10587	-1.10587	377	gi|590598893|ref|XP_007019030.1|	Nodulin MtN21 /EamA-like transporter family protein, putative [Theobroma cacao]	0.93	gi|75276328|sp|Q501F8.1|WTR32_ARATH	RecName: Full=WAT1-related protein At4g08300 [Arabidopsis thaliana]	0.79	GO:0055085;GO:0016021;GO:0022857	3694.gw1.II.1386.1	hypothetical protein	0.8464	COG0697	_	NOG281025	None	_
Gh_D12G0877	2.576	5.56512	0.0007	0.0167282	1.11128	-1.11128	339	gi|590710130|ref|XP_007048743.1|	DNAJ heat shock N-terminal domain-containing protein isoform 2 [Theobroma cacao]	0.93	gi|11132491|sp|Q9UXR9.1|DNAJ_METTE	RecName: Full=Chaperone protein DnaJ	0.55	GO:0009055;GO:0005506;GO:0006118;GO:0051536;GO:0009507	3694.eugene3.00140902	hypothetical protein	0.9079	COG1141;COG2214;COG0484	KOG0716	_	None	_
Gh_D04G0510	8.39373	18.142	5e-05	0.00199199	1.11195	-1.11195	237	gi|590645769|ref|XP_007031435.1|	Nodulin MtN3 family protein, putative [Theobroma cacao]	0.87	gi|75161759|sp|Q8W0K2.1|SWT6B_ORYSJ	RecName: Full=Bidirectional sugar transporter SWEET6b; Short=OsSWEET6b [Oryza sativa Japonica Group]	0.69	GO:0005887;GO:0034219;GO:0009827;GO:0051119;GO:0009860;GO:0010584	_	_	_	_	_	_	K15382	SLC50A, SWEET
Gh_Sca109281G01	0	2.16321	0.001	0.0217966	1.11317	-1.11317	88	gi|119368507|ref|YP_913195.1|	RuBisCO,Ribulose Bisphosphate Carboxylase/Oxygenase large subunit [Gossypium barbadense]	1	gi|125987519|sp|A0ZZ43.1|RBL_GOSBA	RecName: Full=Ribulose bisphosphate carboxylase large chain; Short=RuBisCO large subunit; Flags: Precursor (chloroplast) [Gossypium barbadense]	1	GO:0000287;GO:0009573;GO:0055114;GO:0016984;GO:0019253;GO:0004497;GO:0009853;GO:0046487	3694.gw1.14458.2.1	RecName: Full=Ribulose bisphosphate carboxylase large chain; Short=RuBisCO large subunit; EC [...]	0.9639	COG1850	_	_	K01601	rbcL
Gh_D05G1407	1.24735	2.70005	0.0006	0.014811	1.11412	-1.11412	607	gi|295393250|gb|ADG03462.1|	9-cis-epoxycarotenoid dioxygenase [Gossypium hirsutum]	1	gi|75185609|sp|Q9M6E8.1|NCED1_PHAVU	RecName: Full=9-cis-epoxycarotenoid dioxygenase NCED1, chloroplastic; AltName: Full=PvNCED1; Flags: Precursor	0.87	GO:0055114;GO:0051213	3694.gw1.146.74.1	9-cis-epoxycarotenoid dioxygenase (EC:1.13.11.51)	0.8471	COG3670	KOG1285	_	K09840	NCED
Gh_A11G0920	3.59729	7.79942	5e-05	0.00199199	1.11646	-1.11646	654	gi|590720784|ref|XP_007051425.1|	Pseudo response regulator, putative isoform 1 [Theobroma cacao]	0.74	gi|52783231|sp|Q8L500.2|APRR9_ARATH	RecName: Full=Two-component response regulator-like APRR9; AltName: Full=Pseudo-response regulator 9 [Arabidopsis thaliana]	0.8	GO:0000160;GO:0005622	3694.eugene3.00150024	response regulator	0.7536	COG2204	KOG1601	_	K12130	PRR5
Gh_D05G0901	13.6636	29.6254	5e-05	0.00199199	1.1165	-1.1165	156	gi|159138941|gb|ABW89470.1|	low molecular weight heat shock protein [Gossypium hirsutum]	0.99	gi|123544|sp|P05478.1|HSP16_SOYBN	RecName: Full=18.5 kDa class I heat shock protein; AltName: Full=HSP 18.5	0.92	_	3694.estExt_Genewise1_v1.C_LG_IX3982	hypothetical protein	0.9556	COG0071	KOG0710	_	K13993	HSP20
Gh_A11G1764	2.57543	5.59919	0.0024	0.041209	1.1204	-1.1204	264	gi|590704569|ref|XP_007047194.1|	NAD(P)-binding Rossmann-fold superfamily protein [Theobroma cacao]	0.93	gi|75060932|sp|Q5E9H7.1|DHB12_BOVIN	RecName: Full=Estradiol 17-beta-dehydrogenase 12; AltName: Full=17-beta-hydroxysteroid dehydrogenase 12; Short=17-beta-HSD 12; AltName: Full=3-ketoacyl-CoA reducta	0.47	GO:0055114;GO:0016491	59689.scaffold_502084.1	annotation not avaliable	0.8112	COG1028	KOG1014	_	None	_
Gh_A02G1000	7.04382	15.3326	5e-05	0.00199199	1.12217	-1.12217	624	gi|658115740|gb|AID55373.1|	glycoside hydrolase family 9 C2 [Gossypium hirsutum]	1	gi|114149314|sp|Q42059.2|GUN6_ARATH	RecName: Full=Endoglucanase 6; AltName: Full=Endo-1,4-beta glucanase 6; Flags: Precursor [Arabidopsis thaliana]	0.88	GO:0030246;GO:0005982;GO:0030245;GO:0005985;GO:0008810	3694.fgenesh4_pg.C_LG_I000818	hydrolase, hydrolyzing O-glycosyl compounds (EC:3.2.1.4)	0.9073	_	_	NOG05134	None	_
Gh_A07G1811	5.30782	11.5541	5e-05	0.00199199	1.12221	-1.12221	403	gi|590713652|ref|XP_007049703.1|	Nam protein 1, putative [Theobroma cacao]	0.81	gi|51316421|sp|Q84K00.2|NAC78_ARATH	RecName: Full=NAC domain-containing protein 78; Short=ANAC078 [Arabidopsis thaliana]	0.56	GO:0005634;GO:0003677;GO:0006355	_	_	_	_	_	_	None	_
Gh_D05G0313	1.70546	3.72701	0.00015	0.00504383	1.12786	-1.12786	540	gi|590575729|ref|XP_007012769.1|	Lycopene beta/epsilon cyclase protein [Theobroma cacao]	0.93	gi|11132841|sp|O65837.1|LCYE_SOLLC	RecName: Full=Lycopene epsilon cyclase, chloroplastic; Flags: Precursor	0.89	GO:0016123;GO:0016705;GO:0010103;GO:0055114;GO:0045435	29760.GSVIVG00016526001	SubName: Full=Chromosome chr11 scaffold_13, whole genome shotgun sequence;	0.8828	_	_	NOG12892	K06444	lcyE, crtL2
Gh_A08G1551	5.2702	11.546	5e-05	0.00199199	1.13146	-1.13146	284	gi|590677104|ref|XP_007039926.1|	Pentapeptide repeat-containing protein isoform 2 [Theobroma cacao]	0.92	gi|75151954|sp|Q8H1Q1.1|TL225_ARATH	RecName: Full=Thylakoid lumenal protein At1g12250, chloroplastic; Flags: Precursor [Arabidopsis thaliana]	0.79	GO:0009535	3694.eugene3.00030850	hypothetical protein	0.9847	COG1357	_	_	None	_
Gh_A09G0689	4.25048	9.33869	5e-05	0.00199199	1.13559	-1.13559	264	gi|590624678|ref|XP_007025670.1|	Aluminum induced protein with YGL and LRDR motifs [Theobroma cacao]	0.87	gi|136452|sp|P24805.1|TSJT1_TOBAC	RecName: Full=Stem-specific protein TSJT1 [Nicotiana tabacum]	0.53	_	29760.GSVIVG00027636001	SubName: Full=Chromosome chr19 scaffold_4, whole genome shotgun sequence;	0.8033	_	_	NOG248559	None	_
Gh_A01G0922	8.31869	18.4058	5e-05	0.00199199	1.14573	-1.14573	392	gi|590593779|ref|XP_007017667.1|	Walls Are Thin 1 [Theobroma Walls Are Thin 1 [Theobroma cacao]	0.92	gi|75165000|sp|Q94AP3.1|WAT1_ARATH	RecName: Full=Protein WALLS ARE THIN 1 [Arabidopsis thaliana]	0.85	GO:0006833;GO:0000271;GO:0048767;GO:0009705;GO:0007389;GO:0009926;GO:0016021;GO:0009651;GO:0071555;GO:0090358;GO:0005886;GO:0009834;GO:0055085;GO:0008361;GO:0090355;GO:0009750;GO:0010075;GO:0009932;GO:0009825;GO:0043481;GO:0022857	3694.estExt_fgenesh4_pg.C_LG_II0267	SubName: Full=Putative uncharacterized protein;	0.9031	_	_	NOG242902	None	_
Gh_D12G0543	3.99367	8.89511	5e-05	0.00199199	1.1553	-1.1553	374	gi|590651730|ref|XP_007032965.1|	Zinc finger protein CONSTANS-LIKE 2 [Theobroma cacao]	0.89	gi|17432980|sp|O50055.1|COL1_ARATH	RecName: Full=Zinc finger protein CONSTANS-LIKE 1 [Arabidopsis thaliana]	0.68	GO:0005622;GO:0008270	3694.gw1.123.49.1	SubName: Full=Putative uncharacterized protein;	0.8359	_	KOG1601	_	None	_
Gh_D09G1782	10.3078	22.9672	5e-05	0.00199199	1.15584	-1.15584	608	gi|590675064|ref|XP_007039341.1|	UDP-Glycosyltransferase superfamily protein isoform 1 [Theobroma cacao]	0.91	gi|2833388|sp|Q43784.1|SSG1_MANES	RecName: Full=Granule-bound starch synthase 1, chloroplastic/amyloplastic; AltName: Full=Granule-bound starch synthase I; Short=GBSS-I; Flags: Precursor	0.84	GO:0019252;GO:0010264;GO:0019375;GO:0009501;GO:0009011;GO:0005985;GO:0009507;GO:0001666	3694.estExt_fgenesh4_pg.C_LG_I3141	SubName: Full=Putative uncharacterized protein;	0.8737	COG0297	_	_	K13679	WAXY
Gh_D02G1616	2.14976	4.79694	5e-05	0.00199199	1.15794	-1.15794	585	gi|590695109|ref|XP_007044798.1|	Phosphate transporter 2,1 [Theobroma cacao]	0.92	gi|75275184|sp|Q38954.1|PHT21_ARATH	RecName: Full=Inorganic phosphate transporter 2-1, chloroplastic; AltName: Full=H(+)/Pi cotransporter; Short=AtPht2;1; Flags: Precursor [Arabidopsis thaliana]	0.86	GO:0016020;GO:0005315;GO:0052543;GO:0035435;GO:0009941;GO:0016117;GO:0009556;GO:0009673	3694.gw1.VIII.2455.1	low affinity inorganic phosphate transporter	0.9173	COG0306	KOG2493	_	K14640	SLC20A, PIT
Gh_A06G0507	5.50276	12.2792	5e-05	0.00199199	1.15799	-1.15799	443	gi|590577678|ref|XP_007013300.1|	Transmembrane domain protein isoform 1 [Theobroma cacao]	0.97	gi|122178084|sp|Q1EBV7.1|BASS2_ARATH	RecName: Full=Sodium/pyruvate cotransporter BASS2, chloroplastic; AltName: Full=Bile acid transporter 1; AltName: Full=Bile acid-sodium symporter family protein 2	0.96	GO:0019252;GO:0000023;GO:0019761;GO:0016021;GO:0006849;GO:0009534;GO:0050833;GO:0043085	29760.GSVIVG00016816001	SubName: Full=Chromosome chr11 scaffold_13, whole genome shotgun sequence;	0.9795	COG0385	KOG2718	_	K03453	TC.BASS
Gh_D08G1737	164.927	368.555	5e-05	0.00199199	1.16005	-1.16005	159	gi|320090070|gb|ADW08704.1|	heat shock protein [Gossypium hirsutum]	1	gi|123544|sp|P05478.1|HSP16_SOYBN	RecName: Full=18.5 kDa class I heat shock protein; AltName: Full=HSP 18.5	0.87	_	3694.estExt_Genewise1_v1.C_LG_IX3982	hypothetical protein	0.8889	COG0071	KOG0710	_	K13993	HSP20
Gh_A08G1728	0.810506	1.81408	0.0026	0.0436627	1.16234	-1.16234	614	gi|590713953|ref|XP_007049780.1|	Phototropic-responsive NPH3 family protein [Theobroma cacao]	0.93	gi|75262602|sp|Q9FKB6.1|Y5880_ARATH	RecName: Full=BTB/POZ domain-containing protein At5g48800 [Arabidopsis thaliana]	0.87	GO:0010014;GO:0009855;GO:0009944;GO:0005886;GO:0010075	3694.grail3.0021022701	hypothetical protein	0.941	_	_	NOG251377	None	_
Gh_D04G1090	13.6841	30.7602	5e-05	0.00199199	1.16856	-1.16856	285	gi|118132690|gb|ABK60196.1|	PIP2 protein [Gossypium hirsutum]	0.99	gi|21431896|sp|P43287.2|PIP22_ARATH	RecName: Full=Aquaporin PIP2-2; AltName: Full=Plasma membrane intrinsic protein 2-2; Short=AtPIP2;2; AltName: Full=Plasma membrane intrinsic protein 2b; Short=PIP2	0.91	GO:0006810;GO:0016021;GO:0005215	3694.estExt_Genewise1_v1.C_LG_XVI2799	SubName: Full=Putative uncharacterized protein;	0.9393	COG0580	KOG0223	_	K09872	PIP
Gh_A07G0470	3.82754	8.60657	5e-05	0.00199199	1.16902	-1.16902	567	gi|126770|sp|P17432.1|MASY_GOSHI	RecName: Full=Malate synthase, glyoxysomal [Gossypium hirsutum]	0.99	gi|126770|sp|P17432.1|MASY_GOSHI	RecName: Full=Malate synthase, glyoxysomal [Gossypium hirsutum]	0.99	GO:0006099;GO:0006097;GO:0006090;GO:0004474;GO:0009514	3694.fgenesh4_pg.C_LG_XV000664	malate synthase (EC:2.3.3.9)	0.9421	COG2225	KOG1261	_	K01638	E2.3.3.9, aceB, glcB
Gh_A01G0361	0.890783	2.00944	0.00315	0.0498782	1.17365	-1.17365	519	gi|590610557|ref|XP_007021849.1|	RING/FYVE/PHD-type zinc finger family protein isoform 1 [Theobroma cacao]	0.88	gi|74625804|sp|Q9URW6.1|YIE2_SCHPO	RecName: Full=SH3 domain-containing protein PJ696.02 [Schizosaccharomyces pombe 972h-]	0.59	GO:0046872	29760.GSVIVG00027866001	SubName: Full=Chromosome chr19 scaffold_4, whole genome shotgun sequence;	0.8694	COG2930	KOG1843	_	None	_
Gh_D12G0472	1.98453	4.48539	5e-05	0.00199199	1.17644	-1.17644	601	gi|590680856|ref|XP_007040953.1|	CTP synthase family protein isoform 1 [Theobroma cacao]	0.93	gi|20981706|sp|P17812.2|PYRG1_HUMAN	RecName: Full=CTP synthase 1; AltName: Full=CTP synthetase 1; AltName: Full=UTP--ammonia ligase 1 [Homo sapiens]	0.75	GO:0006541;GO:0005524;GO:0044210;GO:0006206;GO:0003883	3694.estExt_Genewise1_v1.C_LG_III0729	CTP synthase (EC:6.3.4.2)	0.9215	COG0504	KOG2387	_	K01937	E6.3.4.2, pyrG
Gh_D10G2162	1.61445	3.66853	5e-05	0.00199199	1.18416	-1.18416	724	gi|590564044|ref|XP_007009548.1|	Sulfate transporter 4.1 isoform 1 [Theobroma cacao]	0.9	gi|37088896|sp|Q8GYH8.2|SUT42_ARATH	RecName: Full=Probable sulfate transporter 4.2 [Arabidopsis thaliana]	0.88	GO:1902358;GO:0016021;GO:0008271	29760.GSVIVG00029532001	SubName: Full=Chromosome chr13 scaffold_48, whole genome shotgun sequence;	0.9189	COG0659	KOG0236	_	K18059	SULTR4
Gh_A05G2432	7.51649	17.0819	5e-05	0.00199199	1.18434	-1.18434	266	gi|643733721|gb|KDP40564.1|	hypothetical protein JCGZ_24563 [Jatropha curcas]	0.58	_	_	_	_	3694.eugene3.00010231	SubName: Full=Putative uncharacterized protein;	0.7524	_	_	NOG221935	None	_
Gh_D10G0313	3.06677	6.98137	0.0006	0.014811	1.18679	-1.18679	280	gi|300793630|tpg|DAA33874.1|	TPA_inf: aquaporin NIP1;1 [Gossypium hirsutum]	0.99	gi|75282081|sp|Q40746.1|NIP11_ORYSJ	RecName: Full=Aquaporin NIP1-1; AltName: Full=NOD26-like intrinsic protein 1-1; AltName: Full=OsNIP1;1 [Oryza sativa Japonica Group]	0.87	GO:0006810;GO:0016021;GO:0005215	29760.GSVIVG00035815001	SubName: Full=Chromosome chr10 scaffold_81, whole genome shotgun sequence;	0.9364	COG0580	KOG0223	_	K09874	NIP
Gh_D05G0150	11.6761	26.7043	5e-05	0.00199199	1.19351	-1.19351	138	gi|590578265|ref|XP_007013460.1|	Uncharacterized protein isoform 1 [Theobroma cacao]	0.87	_	_	_	_	3694.fgenesh4_pg.C_LG_XVIII001122	hypothetical protein	0.78	_	_	NOG264018	None	_
Gh_D06G0794	5.56414	12.7653	0.002	0.0361074	1.198	-1.198	140	gi|590575208|ref|XP_007012621.1|	Copper transporter 5 [Theobroma Copper transporter 5 [Theobroma cacao]	0.93	gi|75163170|sp|Q93VM8.1|COPT5_ARATH	RecName: Full=Copper transporter 5; Short=AtCOPT5 [Arabidopsis thaliana]	0.73	GO:0035434;GO:0016021;GO:0005375	3694.estExt_Genewise1_v1.C_280107	copper transporter	0.8369	_	KOG3386	_	K14686	SLC31A1, CTR1
Gh_A08G1442	99.0577	227.663	5e-05	0.00199199	1.20056	-1.20056	159	gi|335327540|gb|AEH30707.1|	low molecular weight heat shock protein [Gossypium hirsutum]	1	gi|75279027|sp|O82012.1|HSP12_SOLPE	RecName: Full=17.6 kDa class I heat shock protein; AltName: Full=Hsp20.0	0.85	_	3694.estExt_Genewise1_v1.C_LG_IX3982	hypothetical protein	0.8889	COG0071	KOG0710	_	K13993	HSP20
Gh_D05G1276	4.88026	11.2321	5e-05	0.00199199	1.2026	-1.2026	270	gi|590620080|ref|XP_007024447.1|	Pyridoxal phosphate phosphatase-related protein [Theobroma cacao]	0.91	gi|75116575|sp|Q67YC0.1|PPSP1_ARATH	RecName: Full=Inorganic pyrophosphatase 1; Short=AtPPsPase1; Short=PPi phosphatase 1; Short=Pyrophosphate-specific phosphatase 1; AltName: Full=Protein PHOSPHATE S	0.78	GO:0016311;GO:0016791	29760.GSVIVG00034199001	SubName: Full=Chromosome chr9 scaffold_7, whole genome shotgun sequence;	0.9217	_	KOG3120	_	K13248	PHOSPHO2
Gh_Sca008601G01	0	2.30155	0.00225	0.0393638	1.20261	-1.20261	83	gi|659127971|ref|XP_008463983.1|	PREDICTED: uncharacterized protein LOC103501974 isoform X2 [Cucumis melo]	0.69	_	_	_	GO:0016787;GO:0006629	_	_	_	_	_	_	None	_
Gh_A03G0120	2.39973	5.52523	5e-05	0.00199199	1.20316	-1.20316	498	gi|590677334|ref|XP_007039988.1|	Photolyase 1 isoform 1 [Theobroma cacao]	0.92	gi|75201504|sp|Q9SB00.1|PHR_ARATH	RecName: Full=Deoxyribodipyrimidine photo-lyase; AltName: Full=AtCPDII; AltName: Full=DNA photolyase; AltName: Full=Photoreactivating enzyme 1; AltName: Full=Protein	0.86	GO:0009650;GO:0003904;GO:0000719	3702.AT1G12370.2-P	PHR1 (PHOTOLYASE 1); DNA photolyase; encodes an amino acid sequence with significant homolog [...]	0.8566	COG0415	KOG0133	_	K01669	E4.1.99.3, phrB
Gh_D01G2085	3.48482	8.03308	0.0003	0.00871602	1.20487	-1.20487	237	gi|164668308|gb|ABK60195.2|	PIP2 protein [Gossypium hirsutum]	1	gi|21431896|sp|P43287.2|PIP22_ARATH	RecName: Full=Aquaporin PIP2-2; AltName: Full=Plasma membrane intrinsic protein 2-2; Short=AtPIP2;2; AltName: Full=Plasma membrane intrinsic protein 2b; Short=PIP2	0.93	GO:0006810;GO:0016021;GO:0005215	3694.estExt_Genewise1_v1.C_LG_XVI2799	SubName: Full=Putative uncharacterized protein;	0.9363	COG0580	KOG0223	_	K09872	PIP
Gh_A12G1238	37.1325	85.7322	5e-05	0.00199199	1.20715	-1.20715	157	gi|335327538|gb|AEH30706.1|	low molecular weight heat shock protein [Gossypium hirsutum]	0.97	gi|123538|sp|P04793.1|HSP13_SOYBN	RecName: Full=17.5 kDa class I heat shock protein; AltName: Full=HSP 17.5-M [Glycine max]	0.91	_	3694.grail3.0066002801	hypothetical protein	0.981	COG0071	KOG0710	_	K13993	HSP20
Gh_A09G2314	6.75658	15.6998	5e-05	0.00199199	1.21638	-1.21638	238	gi|590655193|ref|XP_007033916.1|	COL domain class transcription factor isoform 1 [Theobroma cacao]	0.91	gi|17433180|sp|Q96288.1|STO_ARATH	RecName: Full=Salt tolerance protein [Arabidopsis thaliana]	0.69	GO:0005622;GO:0008270	3694.estExt_fgenesh4_pg.C_640116	hypothetical protein	0.9891	_	KOG1601	_	None	_
Gh_D08G1857	5.01508	11.7018	5e-05	0.00199199	1.22239	-1.22239	283	gi|590677104|ref|XP_007039926.1|	Pentapeptide repeat-containing protein isoform 2 [Theobroma cacao]	0.93	gi|75151954|sp|Q8H1Q1.1|TL225_ARATH	RecName: Full=Thylakoid lumenal protein At1g12250, chloroplastic; Flags: Precursor [Arabidopsis thaliana]	0.77	GO:0009535	3694.eugene3.00030850	hypothetical protein	0.9847	COG1357	_	_	None	_
Gh_A05G3028	11.3788	26.6573	5e-05	0.00199199	1.22818	-1.22818	485	gi|590563163|ref|XP_007009290.1|	Regulator of chromosome condensation repeat-containing protein isoform 1 [Theobroma cacao]	0.93	gi|75171768|sp|Q9FN03.1|UVR8_ARATH	RecName: Full=Ultraviolet-B receptor UVR8; AltName: Full=Protein UV-B RESISTANCE 8; AltName: Full=RCC1 domain-containing protein UVR8 [Arabidopsis thaliana]	0.6	_	29760.GSVIVG00018415001	SubName: Full=Chromosome chr13 scaffold_17, whole genome shotgun sequence;	0.8944	COG5184	KOG1426	_	None	_
Gh_D07G1908	9.66409	22.8003	0.0026	0.0436627	1.23835	-1.23835	101	_	_	_	_	_	_	_	_	_	_	_	_	_	None	_
Gh_D06G0564	8.66504	20.4711	5e-05	0.00199199	1.24031	-1.24031	418	gi|590577678|ref|XP_007013300.1|	Transmembrane domain protein isoform 1 [Theobroma cacao]	0.94	gi|122178084|sp|Q1EBV7.1|BASS2_ARATH	RecName: Full=Sodium/pyruvate cotransporter BASS2, chloroplastic; AltName: Full=Bile acid transporter 1; AltName: Full=Bile acid-sodium symporter family protein 2	0.96	GO:0019252;GO:0000023;GO:0019761;GO:0016021;GO:0006849;GO:0009534;GO:0050833;GO:0043085	29760.GSVIVG00016816001	SubName: Full=Chromosome chr11 scaffold_13, whole genome shotgun sequence;	0.9727	COG0385	KOG2718	_	K03453	TC.BASS
Gh_D01G2343	1.11296	2.63035	0.0012	0.0249221	1.24085	-1.24085	480	gi|590588672|ref|XP_007016260.1|	Cytochrome P450, putative [Theobroma cacao]	0.79	gi|73917647|sp|Q7XU38.3|C87A3_ORYSJ	RecName: Full=Cytochrome P450 87A3 [Oryza sativa Japonica Group]	0.64	GO:0046872;GO:0016491	_	_	_	_	_	_	None	_
Gh_A10G1589	78.3553	185.382	5e-05	0.00199199	1.2424	-1.2424	71	gi|593796004|ref|XP_007161040.1|	hypothetical protein PHAVU_001G037800g [Phaseolus vulgaris]	0.9	_	_	_	_	_	_	_	_	_	_	None	_
Gh_D05G0387	13.8707	32.9013	5e-05	0.00199199	1.2461	-1.2461	185	gi|590574558|ref|XP_007012436.1|	Damaged dna-binding 2, putative isoform 1 [Theobroma cacao]	0.74	_	_	_	_	29760.GSVIVG00016447001	SubName: Full=Chromosome chr11 scaffold_13, whole genome shotgun sequence;	0.8421	_	KOG4210	_	None	_
Gh_D11G1897	7.06165	16.8729	5e-05	0.00199199	1.25663	-1.25663	332	gi|590704202|ref|XP_007047093.1|	Photosystem II subunit O-2 [Theobroma cacao]	0.97	gi|11134054|sp|Q40459.1|PSBO_TOBAC	RecName: Full=Oxygen-evolving enhancer protein 1, chloroplastic; Short=OEE1; AltName: Full=33 kDa subunit of oxygen evolving system of photosystem II; AltName: Full	0.93	GO:0042549;GO:0005509;GO:0019898;GO:0016021;GO:0009654	3694.estExt_fgenesh4_kg.C_LG_VII0034	SubName: Full=Putative uncharacterized protein;	0.9426	_	_	NOG05777	K02716	psbO
Gh_D10G0217	15.3494	36.759	5e-05	0.00199199	1.25992	-1.25992	255	gi|590624678|ref|XP_007025670.1|	Aluminum induced protein with YGL and LRDR motifs [Theobroma cacao]	0.9	gi|136452|sp|P24805.1|TSJT1_TOBAC	RecName: Full=Stem-specific protein TSJT1 [Nicotiana tabacum]	0.56	_	29760.GSVIVG00027636001	SubName: Full=Chromosome chr19 scaffold_4, whole genome shotgun sequence;	0.8112	_	_	NOG248559	None	_
Gh_A12G0130	1.12841	2.7036	0.0016	0.0308075	1.26059	-1.26059	435	gi|661899439|emb|CDO97433.1|	unnamed protein product [Coffea canephora]	0.79	gi|189083285|sp|B0CAZ0.1|DNAJ_ACAM1	RecName: Full=Chaperone protein DnaJ [Acaryochloris marina MBIC11017]	0.67	GO:0006457;GO:0046872;GO:0005524;GO:0051082;GO:0031072;GO:0009408	3694.gw1.VII.1758.1	annotation not avaliable	0.8599	COG0484	KOG0715	_	K03686	dnaJ
Gh_D08G1164	2.74269	6.57581	5e-05	0.00199199	1.26158	-1.26158	348	gi|590674980|ref|XP_007039318.1|	2-oxoglutarate (2OG) and Fe(II)-dependent oxygenase superfamily protein isoform 1 [Theobroma cacao]	0.95	gi|75308873|sp|Q9C899.1|F6H2_ARATH	RecName: Full=Feruloyl CoA ortho-hydroxylase 2 [Arabidopsis thaliana]	0.54	GO:0016706;GO:0005506;GO:0055114	29760.GSVIVG00000477001	SubName: Full=Chromosome chr2 scaffold_105, whole genome shotgun sequence;	0.8915	COG3491	KOG0143	_	K06892	K06892
Gh_A12G2620	1.59012	3.81608	0.0011	0.0234005	1.26296	-1.26296	339	gi|590582766|ref|XP_007014714.1|	Uncharacterized protein TCM_040140 [Theobroma cacao]	0.72	_	_	_	_	_	_	_	_	_	_	None	_
Gh_D02G1329	213.836	513.423	5e-05	0.00199199	1.26364	-1.26364	355	gi|338760831|gb|AEI98604.1|	S-adenosylmethionine decarboxylase [Gossypium hirsutum]	0.98	gi|15213963|sp|Q9M4D8.1|DCAM_VICFA	RecName: Full=S-adenosylmethionine decarboxylase proenzyme; Short=AdoMetDC; Short=SAMDC; Contains: RecName: Full=S-adenosylmethionine decarboxylase alpha chain; Con	0.85	GO:0006525;GO:0004014;GO:0006597;GO:0006557;GO:0008295;GO:0006560	29760.GSVIVG00021193001	SubName: Full=Chromosome chr1 scaffold_22, whole genome shotgun sequence;	0.8468	_	KOG0788	_	K01611	speD, AMD1
Gh_A07G1659	0	2.41708	5e-05	0.00199199	1.27327	-1.27327	124	gi|253760055|ref|XP_002488965.1|	hypothetical protein SORBIDRAFT_1138s002030 [Sorghum bicolor]	0.89	_	_	_	_	4558.Sb1138s002030.1	hypothetical protein	0.8878	_	_	NOG252044	None	_
Gh_A08G1139	3.46958	8.42318	0.0006	0.014811	1.2796	-1.2796	187	gi|590721700|ref|XP_007051690.1|	S-adenosyl-L-methionine-dependent methyltransferases superfamily protein [Theobroma cacao]	0.89	gi|68565091|sp|O82353.1|ATL67_ARATH	RecName: Full=RING-H2 finger protein ATL67 [Arabidopsis thaliana]	0.64	GO:0008168;GO:0008270;GO:0032259	3694.gw1.XIV.1451.1	hypothetical protein	0.7802	_	KOG0800	_	None	_
Gh_D10G2310	55.7319	135.352	5e-05	0.00199199	1.28014	-1.28014	487	gi|590563163|ref|XP_007009290.1|	Regulator of chromosome condensation repeat-containing protein isoform 1 [Theobroma cacao]	0.94	gi|75171768|sp|Q9FN03.1|UVR8_ARATH	RecName: Full=Ultraviolet-B receptor UVR8; AltName: Full=Protein UV-B RESISTANCE 8; AltName: Full=RCC1 domain-containing protein UVR8 [Arabidopsis thaliana]	0.55	_	29760.GSVIVG00018415001	SubName: Full=Chromosome chr13 scaffold_17, whole genome shotgun sequence;	0.9222	COG5184	KOG1426	_	None	_
Gh_A03G1172	1.33852	3.26079	0.00035	0.00983058	1.28458	-1.28458	465	gi|590695161|ref|XP_007044812.1|	Phototropic-responsive NPH3 family protein [Theobroma cacao]	0.91	gi|75169788|sp|Q9C9V6.1|Y1790_ARATH	RecName: Full=BTB/POZ domain-containing protein At1g67900 [Arabidopsis thaliana]	0.86	_	3694.fgenesh4_pm.C_LG_VIII000795	hypothetical protein	0.9058	_	_	NOG252231	None	_
Gh_A10G2003	45.3444	110.627	5e-05	0.00199199	1.28671	-1.28671	489	gi|590563163|ref|XP_007009290.1|	Regulator of chromosome condensation repeat-containing protein isoform 1 [Theobroma cacao]	0.94	gi|75171768|sp|Q9FN03.1|UVR8_ARATH	RecName: Full=Ultraviolet-B receptor UVR8; AltName: Full=Protein UV-B RESISTANCE 8; AltName: Full=RCC1 domain-containing protein UVR8 [Arabidopsis thaliana]	0.55	_	29760.GSVIVG00018415001	SubName: Full=Chromosome chr13 scaffold_17, whole genome shotgun sequence;	0.9167	COG5184	KOG1426	_	None	_
Gh_A05G1144	40.5963	99.3704	5e-05	0.00199199	1.29147	-1.29147	152	gi|590621197|ref|XP_007024732.1|	HSP20-like chaperones superfamily protein [Theobroma cacao]	0.93	gi|75314096|sp|Q9SYG1.1|HS174_ARATH	RecName: Full=17.4 kDa class III heat shock protein; AltName: Full=17.4 kDa heat shock protein 2; Short=AtHsp17.4B [Arabidopsis thaliana]	0.79	GO:0006457	3694.estExt_Genewise1_v1.C_LG_III1704	hypothetical protein	0.871	COG0071	KOG0710	_	K13993	HSP20
Gh_A08G0192	9.3508	22.9423	5e-05	0.00199199	1.29485	-1.29485	314	gi|421991534|gb|AFX73405.1|	constans-like protein 1 [Gossypium hirsutum]	0.98	gi|52788296|sp|Q9FHH8.2|COL5_ARATH	RecName: Full=Zinc finger protein CONSTANS-LIKE 5 [Arabidopsis thaliana]	0.71	GO:0005622;GO:0008270	_	_	_	_	_	_	None	_
Gh_D06G1799	3.93507	9.65993	5e-05	0.00199199	1.29562	-1.29562	470	gi|12620883|gb|AAG61121.1|AF329935_1	ribulose-1,5-bisphosphate carboxylase/oxygenase activase 2 [Gossypium hirsutum]	1	gi|68565782|sp|Q7X9A0.1|RCA1_LARTR	RecName: Full=Ribulose bisphosphate carboxylase/oxygenase activase 1, chloroplastic; Short=RA 1; Short=RuBisCO activase 1; AltName: Full=RuBisCO activase alpha form	0.91	GO:0009535;GO:0048046;GO:0005524;GO:0010150;GO:0009637;GO:0043900;GO:0010363;GO:0009595;GO:0010200;GO:0019684;GO:0010310;GO:0010218;GO:0046863;GO:0009941;GO:0010114;GO:0043085;GO:0010155;GO:0009644;GO:0050832;GO:0005634;GO:0000165;GO:0006612;GO:0009862;GO:0009744;GO:0043531;GO:0005618;GO:0009867;GO:0009697;GO:0010319;GO:0031348	29760.GSVIVG00024270001	SubName: Full=Chromosome chr6 scaffold_3, whole genome shotgun sequence;	0.8982	_	KOG0651	_	None	_
Gh_A05G1095	3.47427	8.53973	5e-05	0.00199199	1.29748	-1.29748	403	gi|590619544|ref|XP_007024326.1|	Iq-domain 14 isoform 1 [Theobroma cacao]	0.79	gi|75153700|sp|Q8L4D8.1|IQD31_ARATH	RecName: Full=Protein IQ-DOMAIN 31 [Arabidopsis thaliana]	0.75	_	29760.GSVIVG00034291001	SubName: Full=Chromosome chr9 scaffold_7, whole genome shotgun sequence;	0.7711	_	_	NOG274051	None	_
Gh_Sca004992G02	0	2.46098	5e-05	0.00199199	1.29923	-1.29923	124	gi|253760055|ref|XP_002488965.1|	hypothetical protein SORBIDRAFT_1138s002030 [Sorghum bicolor]	0.83	_	_	_	_	4558.Sb1138s002030.1	hypothetical protein	0.8265	_	_	NOG252044	None	_
Gh_D11G3312	3.938	9.73029	0.00145	0.0286327	1.30502	-1.30502	153	gi|590629011|ref|XP_007026871.1|	Proteasome inhibitor-related [Theobroma cacao]	0.71	_	_	_	_	_	_	_	_	_	_	None	_
Gh_A06G0525	6.18109	15.2962	0.00035	0.00983058	1.30724	-1.30724	145	gi|395758615|gb|AFN70435.1|	multiprotein bridging factor 1 transcriptional coactivator [Gossypium hirsutum]	0.98	gi|75274343|sp|Q9LV58.1|MBF1C_ARATH	RecName: Full=Multiprotein-bridging factor 1c [Arabidopsis thaliana]	0.86	GO:0043565	3694.grail3.0020003201	hypothetical protein	0.8897	COG1813	KOG3398	_	K03627	MBF1
Gh_D11G2599	2.27055	5.70134	0.00245	0.0418302	1.32826	-1.32826	199	gi|359485824|ref|XP_003633343.1|	PREDICTED: receptor-like protein 12-like [Vitis vinifera]	0.68	gi|75334096|sp|Q9FN37.1|PSKR2_ARATH	RecName: Full=Phytosulfokine receptor 2; Short=AtPSKR2; AltName: Full=Phytosulfokine LRR receptor kinase 2; Flags: Precursor [Arabidopsis thaliana]	0.67	_	_	_	_	_	_	_	None	_
Gh_D13G2436	0.849369	2.15485	0.0016	0.0308075	1.34312	-1.34312	480	gi|590591018|ref|XP_007016898.1|	Mitogen-activated protein kinase kinase kinase 13, putative [Theobroma cacao]	0.85	gi|160332306|sp|Q99759.2|M3K3_HUMAN	RecName: Full=Mitogen-activated protein kinase kinase kinase 3; AltName: Full=MAPK/ERK kinase kinase 3; Short=MEK kinase 3; Short=MEKK 3 [Homo sapiens]	0.53	GO:0005524;GO:0004672;GO:0006468	3702.AT2G30040.1-P	MAPKKK14; ATP binding / kinase/ protein kinase/ protein serine/threonine kinase; member of M [...]	0.8397	COG0515	_	_	None	_
Gh_D08G2762	4.56851	11.6672	5e-05	0.00199199	1.35266	-1.35266	434	gi|590582630|ref|XP_007014676.1|	ACD1-like [Theobroma cacao]	0.88	gi|75248733|sp|Q8W496.1|PTC52_ARATH	RecName: Full=Protochlorophyllide-dependent translocon component 52, chloroplastic; AltName: Full=ACD1-like protein; AltName: Full=Protein TIC 55-IV; AltName: Full	0.77	GO:0051537;GO:0046872;GO:0010277;GO:0009941;GO:0055114	3694.gw1.I.6467.1	hypothetical protein	0.7787	COG4638	_	_	None	_
Gh_A08G1440	1.31809	3.3743	5e-05	0.00199199	1.35614	-1.35614	554	gi|590675891|ref|XP_007039578.1|	CheY-like two-component responsive regulator family protein isoform 1 [Theobroma cacao]	0.88	gi|52783226|sp|Q6LA43.2|APRR2_ARATH	RecName: Full=Two-component response regulator-like APRR2; AltName: Full=Pseudo-response regulator 2; AltName: Full=TOC2 protein [Arabidopsis thaliana]	0.8	GO:0007623;GO:0003677;GO:0006355;GO:0009736;GO:0000160;GO:0003682;GO:0005667;GO:0045449;GO:0003700	29760.GSVIVG00015824001	SubName: Full=Chromosome chr2 scaffold_11, whole genome shotgun sequence;	0.775	COG2204	KOG1601	_	None	_
Gh_A07G2036	67.4315	173.467	0.00195	0.0354558	1.36317	-1.36317	56	gi|195613016|gb|ACG28338.1|	hypothetical protein [Zea mays]	0.96	_	_	_	GO:0009507	_	_	_	_	_	_	None	_
Gh_D01G0090	3.06478	7.92283	5e-05	0.00199199	1.37023	-1.37023	536	gi|590687517|ref|XP_007042686.1|	Ethylene-dependent gravitropism-deficient and yellow-green-like 3 [Theobroma cacao]	0.97	gi|75174833|sp|Q9LMU1.1|EGY3_ARATH	RecName: Full=Probable zinc metallopeptidase EGY3, chloroplastic; AltName: Full=Protein ETHYLENE-DEPENDENT GRAVITROPISM-DEFICIENT AND YELLOW-GREEN 3; Short=AtEGY3;	0.95	GO:0006457;GO:0006508;GO:0008233	29760.GSVIVG00038621001	SubName: Full=Putative uncharacterized protein (Chromosome chr3 scaffold_95, whole genome sh [...]	0.955	COG0750	_	_	None	_
Gh_A07G0926	77.1584	200.861	5e-05	0.00199199	1.3803	-1.3803	159	gi|159138935|gb|ABW89467.1|	low molecular weight heat shock protein [Gossypium hirsutum]	0.97	gi|123544|sp|P05478.1|HSP16_SOYBN	RecName: Full=18.5 kDa class I heat shock protein; AltName: Full=HSP 18.5	0.92	_	3694.estExt_Genewise1_v1.C_LG_IX3982	hypothetical protein	0.9333	COG0071	KOG0710	_	K13993	HSP20
Gh_D07G1001	1.37794	3.5931	0.0002	0.00632409	1.38272	-1.38272	447	gi|590588696|ref|XP_007016266.1|	UGT protein isoform 1 [Theobroma cacao]	0.93	gi|75264229|sp|Q9LTH2.1|U76E2_ARATH	RecName: Full=UDP-glycosyltransferase 76E2 [Arabidopsis thaliana]	0.65	GO:0008152;GO:0016758	3694.fgenesh4_pg.C_LG_IX001190	hypothetical protein	0.8049	_	KOG1192	_	None	_
Gh_A11G2168	2.31416	6.08337	0.0001	0.00360715	1.39438	-1.39438	382	gi|443682296|gb|AGC97438.1|	NAC protein 8 [Gossypium hirsutum]	0.96	gi|50401213|sp|Q9ZNU2.1|NAC18_ARATH	RecName: Full=NAC domain-containing protein 18; Short=ANAC018; AltName: Full=Protein NO APICAL MERISTEM; Short=AtNAM [Arabidopsis thaliana]	0.78	GO:0005634;GO:0003677;GO:0010260;GO:0006355;GO:0006865;GO:0005667;GO:0003700;GO:0045449	3694.gw1.XIII.1912.1	NAC domain protein, IPR003441	0.8156	_	_	NOG227842	None	_
Gh_D07G0256	2.75496	7.26802	0.00195	0.0354558	1.39953	-1.39953	179	gi|77744869|gb|ABB02388.1|	temperature-induced lipocalin' [Gossypium arboreum]	0.97	gi|82000433|sp|Q5URA7.1|YR877_MIMIV	RecName: Full=Putative lipocalin R877; Flags: Precursor	0.6	GO:0006810;GO:0005215	29760.GSVIVG00005094001	SubName: Full=Temperature-induced lipocalin (Putative uncharacterized protein) (Chromosome u [...]	0.8444	COG3040	KOG4824	_	K03098	APOD
Gh_D12G1185	17.3297	46.4757	5e-05	0.00199199	1.42323	-1.42323	739	gi|590720674|ref|XP_007051395.1|	Homeodomain-like superfamily protein isoform 1 [Theobroma cacao]	0.87	gi|269969425|sp|Q6R0H1.2|LHY_ARATH	RecName: Full=Protein LHY; AltName: Full=MYB-related transcription factor LHY; AltName: Full=Protein LATE ELONGATED HYPOCOTYL [Arabidopsis thaliana]	0.75	GO:0042754;GO:0000785;GO:0009409;GO:0043433;GO:0044212;GO:0048574;GO:0003682;GO:0005667;GO:0045449;GO:0003700;GO:0009639	_	_	_	_	_	_	K12133	LHY
Gh_Sca005849G01	0	2.69586	5e-05	0.00199199	1.43075	-1.43075	124	gi|195610700|gb|ACG27180.1|	hypothetical protein [Zea mays]	0.73	_	_	_	_	_	_	_	_	_	_	None	_
Gh_A06G1466	3.259	8.82947	5e-05	0.00199199	1.4379	-1.4379	470	gi|12620883|gb|AAG61121.1|AF329935_1	ribulose-1,5-bisphosphate carboxylase/oxygenase activase 2 [Gossypium hirsutum]	1	gi|68565782|sp|Q7X9A0.1|RCA1_LARTR	RecName: Full=Ribulose bisphosphate carboxylase/oxygenase activase 1, chloroplastic; Short=RA 1; Short=RuBisCO activase 1; AltName: Full=RuBisCO activase alpha form	0.91	GO:0009535;GO:0048046;GO:0005524;GO:0010150;GO:0009637;GO:0043900;GO:0010363;GO:0009595;GO:0010200;GO:0019684;GO:0010310;GO:0010218;GO:0046863;GO:0009941;GO:0010114;GO:0043085;GO:0010155;GO:0009644;GO:0050832;GO:0005634;GO:0000165;GO:0006612;GO:0009862;GO:0009744;GO:0043531;GO:0005618;GO:0009867;GO:0009697;GO:0010319;GO:0031348	29760.GSVIVG00024270001	SubName: Full=Chromosome chr6 scaffold_3, whole genome shotgun sequence;	0.8959	_	KOG0651	_	None	_
Gh_A03G1173	2.44015	6.62849	0.003	0.0481485	1.44171	-1.44171	166	gi|590695161|ref|XP_007044812.1|	Phototropic-responsive NPH3 family protein [Theobroma cacao]	0.91	gi|75169788|sp|Q9C9V6.1|Y1790_ARATH	RecName: Full=BTB/POZ domain-containing protein At1g67900 [Arabidopsis thaliana]	0.73	_	_	_	_	_	_	_	None	_
Gh_A11G1738	6.18803	16.9445	5e-05	0.00199199	1.45326	-1.45326	332	gi|590704202|ref|XP_007047093.1|	Photosystem II subunit O-2 [Theobroma cacao]	0.97	gi|11134054|sp|Q40459.1|PSBO_TOBAC	RecName: Full=Oxygen-evolving enhancer protein 1, chloroplastic; Short=OEE1; AltName: Full=33 kDa subunit of oxygen evolving system of photosystem II; AltName: Full	0.93	GO:0042549;GO:0005509;GO:0019898;GO:0016021;GO:0009654	3694.estExt_fgenesh4_kg.C_LG_VII0034	SubName: Full=Putative uncharacterized protein;	0.9426	_	_	NOG05777	K02716	psbO
Gh_D01G1675	0.937506	2.57942	5e-05	0.00199199	1.46015	-1.46015	1020	gi|590683865|ref|XP_007041698.1|	Transmembrane amino acid transporter family protein [Theobroma cacao]	0.91	gi|75266609|sp|Q9SX98.1|LHTL8_ARATH	RecName: Full=Lysine histidine transporter-like 8; AltName: Full=Amino acid transporter-like protein 1 [Arabidopsis thaliana]	0.74	GO:0016021	29760.GSVIVG00010114001	SubName: Full=Chromosome undetermined scaffold_1894, whole genome shotgun sequence;	0.8354	_	KOG1303	_	None	_
Gh_A10G1911	0.395492	1.09223	0.0025	0.04239	1.46556	-1.46556	739	gi|590563838|ref|XP_007009484.1|	Receptor-like protein kinase THESEUS 1 [Theobroma cacao]	0.88	gi|75335601|sp|Q9LX66.1|HERK_ARATH	RecName: Full=Receptor-like protein kinase HERK 1; AltName: Full=Protein HERCULES RECEPTOR KINASE 1; Flags: Precursor [Arabidopsis thaliana]	0.67	GO:0004674;GO:0005524;GO:0009069;GO:0006468	29760.GSVIVG00016292001	SubName: Full=Chromosome chr17 scaffold_12, whole genome shotgun sequence;	0.9028	COG0515	_	_	None	_
Gh_D05G0902	9.00525	24.8779	5e-05	0.00199199	1.46603	-1.46603	156	gi|430764907|gb|AGA62461.1|	low molecular weight heat shock protein [Gossypium hirsutum]	0.98	gi|123534|sp|P02519.1|HSP11_SOYBN	RecName: Full=17.3 kDa class I heat shock protein; AltName: Full=HSP 17.3 [Glycine max]	0.91	_	3694.estExt_Genewise1_v1.C_LG_IX3982	hypothetical protein	0.9556	COG0071	KOG0710	_	K13993	HSP20
Gh_D07G0535	1.59409	4.4131	5e-05	0.00199199	1.46906	-1.46906	567	gi|126770|sp|P17432.1|MASY_GOSHI	RecName: Full=Malate synthase, glyoxysomal [Gossypium hirsutum]	1	gi|126770|sp|P17432.1|MASY_GOSHI	RecName: Full=Malate synthase, glyoxysomal [Gossypium hirsutum]	1	GO:0006099;GO:0006097;GO:0006090;GO:0004474;GO:0009514	3694.fgenesh4_pg.C_LG_XV000664	malate synthase (EC:2.3.3.9)	0.9383	COG2225	KOG1261	_	K01638	E2.3.3.9, aceB, glcB
Gh_D05G0406	3.24748	9.07202	0.00125	0.0256779	1.4821	-1.4821	159	gi|590574337|ref|XP_007012373.1|	17.6 kDa class II heat shock protein [Theobroma cacao]	0.95	gi|232274|sp|P29830.1|HS176_ARATH	RecName: Full=17.6 kDa class II heat shock protein; AltName: Full=17.6 kDa heat shock protein; Short=AtHsp17.6 [Arabidopsis thaliana]	0.9	_	29760.GSVIVG00032242001	SubName: Full=Chromosome chr4 scaffold_6, whole genome shotgun sequence;	0.9167	COG0071	KOG0710	_	K13993	HSP20
Gh_A08G2526	3.07706	8.61913	5e-05	0.00199199	1.48599	-1.48599	535	gi|590582630|ref|XP_007014676.1|	ACD1-like [Theobroma cacao]	0.89	gi|75248733|sp|Q8W496.1|PTC52_ARATH	RecName: Full=Protochlorophyllide-dependent translocon component 52, chloroplastic; AltName: Full=ACD1-like protein; AltName: Full=Protein TIC 55-IV; AltName: Full	0.83	GO:0051537;GO:0046872;GO:0010277;GO:0009941;GO:0055114	3694.gw1.I.6467.1	hypothetical protein	0.8208	COG4638	_	_	None	_
Gh_Sca007624G03	5.68247	15.9179	0.00235	0.0406241	1.48606	-1.48606	108	gi|147860110|emb|CAN82922.1|	hypothetical protein VITISV_033139 [Vitis vinifera]	0.95	_	_	_	GO:0009507	_	_	_	_	_	_	None	_
Gh_A09G2514	0	2.81329	5e-05	0.00199199	1.49226	-1.49226	124	gi|253760055|ref|XP_002488965.1|	hypothetical protein SORBIDRAFT_1138s002030 [Sorghum bicolor]	0.87	_	_	_	_	4558.Sb1138s002030.1	hypothetical protein	0.8673	_	_	NOG252044	None	_
Gh_A07G1183	1.34561	3.79839	0.0029	0.0470004	1.49713	-1.49713	249	gi|590719950|ref|XP_007051198.1|	Uncharacterized protein isoform 1 [Theobroma cacao]	0.9	_	_	_	_	3694.eugene3.00140625	hypothetical protein	0.8182	_	_	NOG228795	None	_
Gh_Sca049676G01	6.98168	19.7595	5e-05	0.00199199	1.5009	-1.5009	231	gi|590704202|ref|XP_007047093.1|	Photosystem II subunit O-2 [Theobroma cacao]	0.99	gi|11134054|sp|Q40459.1|PSBO_TOBAC	RecName: Full=Oxygen-evolving enhancer protein 1, chloroplastic; Short=OEE1; AltName: Full=33 kDa subunit of oxygen evolving system of photosystem II; AltName: Full	0.96	GO:0042549;GO:0005509;GO:0019898;GO:0016021;GO:0009654	3694.estExt_fgenesh4_kg.C_LG_VII0034	SubName: Full=Putative uncharacterized protein;	0.9609	_	_	NOG05777	K02716	psbO
Gh_A10G1424	2.78502	7.93524	0.0003	0.00871602	1.51059	-1.51059	197	gi|34809533|gb|AAQ82687.1|	Epa5p [Candida glabrata]	0.55	_	_	_	_	_	_	_	_	_	_	None	_
Gh_A06G1983	2.02226	5.76876	5e-05	0.00199199	1.51229	-1.51229	725	gi|590622093|ref|XP_007024953.1|	Early-responsive to dehydration stress protein (ERD4) isoform 1 [Theobroma cacao]	0.91	gi|667467056|sp|A9LIW2.2|CSC1L_BRAJU	RecName: Full=CSC1-like protein ERD4; AltName: Full=Protein EARLY-RESPONSIVE TO DEHYDRATION STRESS 4 [Brassica juncea]	0.82	GO:0005774;GO:0009506;GO:0009941;GO:0005886	3694.gw1.I.4474.1	hypothetical protein	0.8474	COG5594	KOG1134	_	None	_
Gh_D04G1229	7.06917	20.197	5e-05	0.00199199	1.51453	-1.51453	201	gi|590628818|ref|XP_007026821.1|	Fructokinase-like 1 [Theobroma Fructokinase-like 1 [Theobroma cacao]	0.95	gi|75207320|sp|Q9SR77.1|HBPL1_ARATH	RecName: Full=Heme-binding-like protein At3g10130, chloroplastic; Flags: Precursor [Arabidopsis thaliana]	0.5	GO:0005634;GO:0016310;GO:0016301;GO:0006399;GO:0016773;GO:0006364;GO:0009658;GO:0042644;GO:0010228;GO:0045893;GO:0048481;GO:0016226;GO:0042793;GO:0010027;GO:0009793	29760.GSVIVG00021444001	SubName: Full=Putative uncharacterized protein (Chromosome chr8 scaffold_23, whole genome sh [...]	0.89	_	_	NOG145045	None	_
Gh_A11G0087	0	2.88518	5e-05	0.00199199	1.52866	-1.52866	99	gi|224122428|ref|XP_002318831.1|	Tapetum-specific protein A9 precursor [Populus trichocarpa]	0.82	gi|5902675|sp|Q43495.1|108_SOLLC	RecName: Full=Protein 108; Flags: Precursor [Solanum lycopersicum]	0.7	_	3694.grail3.0079006901	hypothetical protein	0.8152	_	_	NOG275013	None	_
Gh_D05G0451	1.15153	3.33564	0.0007	0.0167282	1.53441	-1.53441	343	gi|590573858|ref|XP_007012238.1|	Phosphatase 2C family protein [Theobroma cacao]	0.92	gi|75152457|sp|Q8H4S6.2|P2C64_ORYSJ	RecName: Full=Probable protein phosphatase 2C 64; Short=OsPP2C64 [Oryza sativa Japonica Group]	0.75	GO:0004721;GO:0006470	3694.estExt_fgenesh4_pg.C_LG_VI1587	SubName: Full=Putative uncharacterized protein;	0.8309	COG0631	KOG0698	_	None	_
Gh_D05G1137	2.45624	7.11844	5e-05	0.00199199	1.53511	-1.53511	316	gi|549438022|gb|AGX24945.1|	WRKY40 [Gossypium hirsutum]	0.96	gi|20978791|sp|Q9SAH7.1|WRK40_ARATH	RecName: Full=Probable WRKY transcription factor 40; AltName: Full=WRKY DNA-binding protein 40 [Arabidopsis thaliana]	0.7	GO:0005667;GO:0006355;GO:0043565;GO:0045449;GO:0003700	3694.estExt_fgenesh4_pm.C_LG_III0624	SubName: Full=Putative uncharacterized protein;	0.8317	_	_	NOG225799	None	_
Gh_A11G2459	1.67769	4.87079	0.0001	0.00360715	1.53768	-1.53768	360	gi|590644360|ref|XP_007031061.1|	Phosphatase 2C family protein isoform 1 [Theobroma cacao]	0.93	gi|122246566|sp|Q0WRB2.1|P2C73_ARATH	RecName: Full=Probable protein phosphatase 2C 73; Short=AtPP2C73; AltName: Full=AtPPC6;7 [Arabidopsis thaliana]	0.87	GO:0004721;GO:0006470	3694.estExt_Genewise1_v1.C_LG_XIII0701	hypothetical protein	0.915	COG0631	KOG0698	_	None	_
Gh_A09G2467	1.14109	3.32983	0.00055	0.0138713	1.54504	-1.54504	358	gi|329317332|gb|AEB90688.1|	ribulose-1,5-bisphosphate carboxylase/oxygenase large subunit (chloroplast) [Gossypium ribulose-1,5-bisphosphate carboxylase/oxygen	0.98	gi|125987519|sp|A0ZZ43.1|RBL_GOSBA	RecName: Full=Ribulose bisphosphate carboxylase large chain; Short=RuBisCO large subunit; Flags: Precursor (chloroplast) [Gossypium barbadense]	0.98	GO:0000287;GO:0009573;GO:0055114;GO:0016984;GO:0019253;GO:0004497;GO:0009853;GO:0046487	39947.LOC_Osp1g00420.1	ribulose 1,5-bisphosphate carboxylase/oxygenase large chain; RuBisCO catalyzes two reactions [...]	0.9645	COG1850	_	_	K01601	rbcL
Gh_D09G2272	2.35219	6.88624	0.00185	0.0342025	1.54971	-1.54971	176	gi|590661741|ref|XP_007035757.1|	Mitochondrial import inner membrane translocase subunit Tim17/Tim22/Tim23 family protein isoform 1 [Theobroma cacao]	0.9	gi|378523232|sp|Q0WMZ5.1|OP162_ARATH	RecName: Full=Outer envelope pore protein 16-2, chloroplastic; AltName: Full=Chloroplastic outer envelope pore protein of 16 kDa 2; Short=AtOEP16-2; Short=OEP16-2	0.79	GO:0031359;GO:0003333;GO:0042803;GO:0015171	29760.GSVIVG00033121001	SubName: Full=Chromosome chr5 scaffold_64, whole genome shotgun sequence;	0.8239	_	_	NOG287153	None	_
Gh_A02G0721	1.77226	5.2514	0.00045	0.0119291	1.56711	-1.56711	252	gi|590599750|ref|XP_007019269.1|	F9C16.20, putative isoform 2 [Theobroma cacao]	0.93	gi|75165007|sp|Q94AQ9.1|SGRL_ARATH	RecName: Full=Protein STAY-GREEN LIKE, chloroplastic; Flags: Precursor [Arabidopsis thaliana]	0.79	GO:0009658	3694.gw1.II.1790.1	hypothetical protein	0.7936	_	_	NOG136444	None	_
Gh_D05G2515	0.945408	2.80567	0.00095	0.0210029	1.56934	-1.56934	381	gi|590596700|ref|XP_007018407.1|	Branched-chain-amino-acid aminotransferase [Theobroma cacao]	0.94	gi|26391680|sp|Q9M439.1|BCAT2_ARATH	RecName: Full=Branched-chain-amino-acid aminotransferase 2, chloroplastic; Short=Atbcat-2; Flags: Precursor [Arabidopsis thaliana]	0.86	GO:0009744;GO:0052654;GO:0052656;GO:0009407;GO:0009081;GO:0052655;GO:0009750	39946.BGIOSIBCE010246	Os03g0231600	0.7668	COG0115	KOG0975	_	K00826	E2.6.1.42, ilvE
Gh_A09G1956	0.988336	2.96219	5e-05	0.00199199	1.58359	-1.58359	875	gi|590658909|ref|XP_007034984.1|	Zinc knuckle family protein, putative isoform 1 [Theobroma cacao]	0.67	_	_	_	GO:0003677;GO:0006355;GO:0008270;GO:0040007	_	_	_	_	_	_	None	_
Gh_A10G0854	0.549927	1.66617	0.0007	0.0167282	1.59922	-1.59922	606	gi|590703777|ref|XP_007046970.1|	Roline-rich extensin-like receptor kinase 4 [Theobroma cacao]	0.87	gi|75338798|sp|Q9ZNQ8.1|PERK4_ARATH	RecName: Full=Proline-rich receptor-like protein kinase PERK4; AltName: Full=Proline-rich extensin-like receptor kinase 4; Short=AtPERK4 [Arabidopsis thaliana]	0.85	GO:0005524;GO:0009069;GO:0019722;GO:0005622;GO:0009845;GO:0006468;GO:0048364;GO:0004703;GO:0051510	59689.Al_scaffold_0003_3824	annotation not avaliable	0.8513	COG0515	KOG1187	_	None	_
Gh_A08G0408	4.83062	14.7466	5e-05	0.00199199	1.6101	-1.6101	242	gi|590716973|ref|XP_007050515.1|	Bax inhibitor-1 family protein [Theobroma cacao]	0.98	gi|75164899|sp|Q94A20.1|BI1L_ARATH	RecName: Full=BI1-like protein [Arabidopsis thaliana]	0.71	GO:0016021	29760.GSVIVG00023775001	SubName: Full=Chromosome chr7 scaffold_31, whole genome shotgun sequence;	0.9571	COG0670	KOG2322	_	K06890	K06890
Gh_A10G1039	3.48256	10.7294	5e-05	0.00199199	1.62335	-1.62335	332	gi|590658637|ref|XP_007034910.1|	S-adenosyl-L-methionine-dependent methyltransferases superfamily protein [Theobroma cacao]	0.95	gi|75335638|sp|Q9LY74.1|BQMT_ARATH	RecName: Full=2-methyl-6-phytyl-1,4-hydroquinone methyltransferase, chloroplastic; AltName: Full=37 kDa inner envelope membrane protein; Short=E37; AltName: Full=MP	0.89	GO:0008168;GO:0032259	3694.estExt_fgenesh4_pm.C_LG_VIII0681	MPBQ/MSBQ methyltransferase	0.9842	COG0500	KOG1540	_	K12502	VTE3, APG1
Gh_A11G0906	4.44635	13.8866	5e-05	0.00199199	1.643	-1.643	239	gi|590720929|ref|XP_007051465.1|	Homeobox 7 [Theobroma cacao]	0.9	gi|75182677|sp|Q9M276.1|ATB12_ARATH	RecName: Full=Homeobox-leucine zipper protein ATHB-12; AltName: Full=HD-ZIP protein ATHB-12; AltName: Full=Homeodomain transcription factor ATHB-12 [Arabidopsis th	0.68	GO:0005634;GO:0005667;GO:0006355;GO:0043565;GO:0045449;GO:0003700	3694.eugene3.00140486	hypothetical protein	0.8319	_	KOG0483	_	K09338	HD-ZIP
Gh_D08G0863	0	3.13138	5e-05	0.00199199	1.6468	-1.6468	124	gi|253760055|ref|XP_002488965.1|	hypothetical protein SORBIDRAFT_1138s002030 [Sorghum bicolor]	0.86	_	_	_	_	39947.LOC_Os09g01000.1	expressed protein	0.8673	_	_	NOG252044	None	_
Gh_D09G2161	1.39058	4.39569	5e-05	0.00199199	1.6604	-1.6604	875	gi|590658909|ref|XP_007034984.1|	Zinc knuckle family protein, putative isoform 1 [Theobroma cacao]	0.66	_	_	_	GO:0003677;GO:0006355;GO:0008270;GO:0040007	_	_	_	_	_	_	None	_
Gh_D12G2600	0.449737	1.42827	0.0007	0.0167282	1.66712	-1.66712	680	gi|590663310|ref|XP_007036178.1|	U-box domain-containing protein 19, putative [Theobroma cacao]	0.9	gi|75099899|sp|O80742.1|PUB19_ARATH	RecName: Full=U-box domain-containing protein 19; AltName: Full=Plant U-box protein 19 [Arabidopsis thaliana]	0.61	GO:0016567;GO:0004842;GO:0016874	3694.grail3.0005009001	hypothetical protein	0.8094	_	KOG0167	_	None	_
Gh_A07G0547	6.3671	20.2357	5e-05	0.00199199	1.66819	-1.66819	457	gi|590666823|ref|XP_007037069.1|	Homeodomain-like superfamily protein, putative isoform 1 [Theobroma cacao]	0.84	gi|576017754|sp|F4KGY6.1|RVE1_ARATH	RecName: Full=Protein REVEILLE 1	0.69	GO:0003677;GO:0000785;GO:0003682	3694.eugene3.00120065	hypothetical protein	0.7877	_	KOG0724	_	None	_
Gh_D02G0622	42.4002	135.165	5e-05	0.00199199	1.67258	-1.67258	153	gi|159138941|gb|ABW89470.1|	low molecular weight heat shock protein [Gossypium hirsutum]	0.95	gi|123538|sp|P04793.1|HSP13_SOYBN	RecName: Full=17.5 kDa class I heat shock protein; AltName: Full=HSP 17.5-M [Glycine max]	0.91	_	3694.estExt_Genewise1_v1.C_LG_IX3982	hypothetical protein	0.9667	COG0071	KOG0710	_	K13993	HSP20
Gh_Sca004725G01	0.901066	2.88976	0.0002	0.00632409	1.68124	-1.68124	461	gi|224126151|ref|XP_002319767.1|	transferase family protein [Populus trichocarpa]	0.76	gi|75150383|sp|Q8GT20.1|BEBT_TOBAC	RecName: Full=Benzyl alcohol O-benzoyltransferase; AltName: Full=Benzoyl coenzyme A:benzyl alcohol benzoyl transferase [Nicotiana tabacum]	0.76	GO:0016740	3694.eugene3.00130740	hypothetical protein	0.7681	_	_	NOG247072	None	_
Gh_Sca007624G05	5.29829	17.3675	0.0008	0.018462	1.71279	-1.71279	108	gi|147860110|emb|CAN82922.1|	hypothetical protein VITISV_033139 [Vitis vinifera]	0.95	_	_	_	GO:0009507	_	_	_	_	_	_	None	_
Gh_A12G2465	2.83354	9.36401	5e-05	0.00199199	1.72452	-1.72452	470	gi|590666823|ref|XP_007037069.1|	Homeodomain-like superfamily protein, putative isoform 1 [Theobroma cacao]	0.81	gi|576017948|sp|F4K5X6.1|RVE2_ARATH	RecName: Full=Protein REVEILLE 2; AltName: Full=MYB family transcription factor Circadian 1	0.71	GO:0003677;GO:0000785;GO:0003682	3694.eugene3.00120065	hypothetical protein	0.7765	_	KOG0724	_	None	_
Gh_A05G0771	9.18679	30.7261	5e-05	0.00199199	1.74183	-1.74183	156	gi|430764907|gb|AGA62461.1|	low molecular weight heat shock protein [Gossypium hirsutum]	1	gi|123544|sp|P05478.1|HSP16_SOYBN	RecName: Full=18.5 kDa class I heat shock protein; AltName: Full=HSP 18.5	0.89	_	3694.estExt_Genewise1_v1.C_LG_XIX2021	hypothetical protein	0.9043	COG0071	KOG0710	_	K13993	HSP20
Gh_A01G2141	2.13787	7.18819	5e-05	0.00199199	1.74945	-1.74945	279	gi|590632669|ref|XP_007027905.1|	Short chain alcohol dehydrogenase, putative [Theobroma cacao]	0.88	gi|75295505|sp|Q7FAE1.1|MOMAS_ORYSJ	RecName: Full=Momilactone A synthase; Short=OsMAS [Oryza sativa Japonica Group]	0.73	GO:0055114;GO:0016491	29760.GSVIVG00021540001	SubName: Full=Chromosome chr8 scaffold_23, whole genome shotgun sequence;	0.8268	COG1028	KOG0725	_	None	_
Gh_D01G0144	5.00922	17.0658	0.0001	0.00360715	1.76845	-1.76845	154	gi|297806863|ref|XP_002871315.1|	hypothetical protein ARALYDRAFT_908777 [Arabidopsis lyrata subsp. lyrata]	0.99	gi|75333690|sp|Q9FE62.1|YLS8_ARATH	RecName: Full=Thioredoxin-like protein YLS8; AltName: Full=Protein YELLOW-LEAF-SPECIFIC GENE 8 [Arabidopsis thaliana]	0.99	GO:0016197;GO:0000902;GO:0007030;GO:0005737;GO:0016049;GO:0007067;GO:0048193;GO:0005681;GO:0006623;GO:0007033	59689.scaffold_600834.1	annotation not avaliable	0.993	COG0526	KOG3414	_	K12859	TXNL4A, DIB1
Gh_A07G0317	1.50511	5.15027	0.00095	0.0210029	1.77478	-1.77478	217	gi|656991630|gb|AID21717.1|	auxin-responsive IAA29-like protein [Gossypium hirsutum]	0.97	gi|46395937|sp|Q93WC4.2|IAA29_ARATH	RecName: Full=Auxin-responsive protein IAA29; AltName: Full=Indoleacetic acid-induced protein 29 [Arabidopsis thaliana]	0.62	GO:0050794;GO:0009733;GO:0006351	_	_	_	_	_	_	K14484	IAA
Gh_A12G2472	0.389885	1.35205	0.0007	0.0167282	1.79403	-1.79403	680	gi|590663310|ref|XP_007036178.1|	U-box domain-containing protein 19, putative [Theobroma cacao]	0.9	gi|75099899|sp|O80742.1|PUB19_ARATH	RecName: Full=U-box domain-containing protein 19; AltName: Full=Plant U-box protein 19 [Arabidopsis thaliana]	0.61	GO:0016567;GO:0004842;GO:0016874	3694.grail3.0005009001	hypothetical protein	0.8138	_	KOG0167	_	None	_
Gh_D08G0269	8.21077	28.5098	5e-05	0.00199199	1.79587	-1.79587	313	gi|421991534|gb|AFX73405.1|	constans-like protein 1 [Gossypium hirsutum]	1	gi|52788296|sp|Q9FHH8.2|COL5_ARATH	RecName: Full=Zinc finger protein CONSTANS-LIKE 5 [Arabidopsis thaliana]	0.72	GO:0005622;GO:0008270	_	_	_	_	_	_	None	_
Gh_A05G2112	1.81825	6.3219	5e-05	0.00199199	1.79781	-1.79781	295	gi|590727181|ref|XP_007099558.1|	Secretory laccase, putative isoform 1 [Theobroma cacao]	0.84	gi|75334504|sp|Q9FY79.1|LAC14_ARATH	RecName: Full=Laccase-14; AltName: Full=Benzenediol:oxygen oxidoreductase 14; AltName: Full=Diphenol oxidase 14; AltName: Full=Urishiol oxidase 14; Flags: Precurso	0.64	GO:0005507;GO:0055114;GO:0016491	_	_	_	_	_	_	None	_
Gh_A09G1405	4.06076	14.2073	5e-05	0.00199199	1.80681	-1.80681	285	gi|164668308|gb|ABK60195.2|	PIP2 protein [Gossypium hirsutum]	0.97	gi|1175013|sp|P43286.1|PIP21_ARATH	RecName: Full=Aquaporin PIP2-1; AltName: Full=Plasma membrane intrinsic protein 2-1; Short=AtPIP2;1; AltName: Full=Plasma membrane intrinsic protein 2a; Short=PIP2a	0.9	GO:0006810;GO:0016021;GO:0005215	3694.estExt_Genewise1_v1.C_LG_XVI2799	SubName: Full=Putative uncharacterized protein;	0.9433	COG0580	KOG0223	_	K09872	PIP
Gh_D03G1421	7.92199	27.7806	5e-05	0.00199199	1.81014	-1.81014	707	gi|590678564|ref|XP_007040338.1|	Heat shock protein 90.1 [Theobroma cacao]	0.98	gi|1708314|sp|P51819.1|HSP83_IPONI	RecName: Full=Heat shock protein 83 [Ipomoea nil]	0.96	GO:0006457;GO:0005524;GO:0051082;GO:0006950	3694.eugene3.00440247	hypothetical protein	0.9673	COG0326	KOG0019	_	K04079	htpG, HSP90A
Gh_D05G1016	0.790068	2.78497	5e-05	0.00199199	1.81761	-1.81761	519	gi|590591018|ref|XP_007016898.1|	Mitogen-activated protein kinase kinase kinase 13, putative [Theobroma cacao]	0.85	gi|75319559|sp|Q40541.1|NPK1_TOBAC	RecName: Full=Mitogen-activated protein kinase kinase kinase NPK1; AltName: Full=Nicotiana protein kinase 1 [Nicotiana tabacum]	0.57	GO:0005524;GO:0004672;GO:0006468	_	_	_	_	_	_	None	_
Gh_A01G0096	1.37845	4.90096	5e-05	0.00199199	1.83002	-1.83002	730	gi|590687517|ref|XP_007042686.1|	Ethylene-dependent gravitropism-deficient and yellow-green-like 3 [Theobroma cacao]	0.97	gi|75174833|sp|Q9LMU1.1|EGY3_ARATH	RecName: Full=Probable zinc metallopeptidase EGY3, chloroplastic; AltName: Full=Protein ETHYLENE-DEPENDENT GRAVITROPISM-DEFICIENT AND YELLOW-GREEN 3; Short=AtEGY3;	0.95	GO:0006457	3702.AT1G17870.1-P	EGY3 (ETHYLENE-DEPENDENT GRAVITROPISM-DEFICIENT AND YELLOW-GREEN-LIKE 3)	0.9582	COG0750	_	_	None	_
Gh_Sca069038G01	0	3.57366	0.0028	0.0458657	1.8374	-1.8374	71	gi|449464342|ref|XP_004149888.1|	PREDICTED: 26S protease regulatory subunit 8 homolog A-like [Cucumis sativus]	1	gi|75168996|sp|Q9C5U3.1|PRS8A_ARATH	RecName: Full=26S protease regulatory subunit 8 homolog A; AltName: Full=26S proteasome AAA-ATPase subunit RPT6a; AltName: Full=26S proteasome subunit 8 homolog A;	1	GO:0005524;GO:0016787;GO:0030163;GO:0005737	_	_	_	_	_	_	K03066	PSMC5, RPT6
Gh_D10G2255	0.680139	2.43632	0.00045	0.0119291	1.8408	-1.8408	444	gi|590563221|ref|XP_007009308.1|	SC35-like splicing factor 30 isoform 1 [Theobroma cacao]	0.88	gi|75329651|sp|Q8L3X8.1|SRC30_ARATH	RecName: Full=Serine/arginine-rich SC35-like splicing factor SCL30; Short=At-SCL30; Short=AtSCL30; AltName: Full=SC35-like splicing factor 30; AltName: Full=Serine	0.67	GO:0006979;GO:0000398;GO:0000166;GO:0016607;GO:0003676	3694.gw1.X.2172.1	hypothetical protein	0.9462	_	KOG0118	_	K12900	FUSIP1
Gh_D09G2122	26.4879	94.9022	5e-05	0.00199199	1.84111	-1.84111	193	gi|590658486|ref|XP_007034868.1|	Early light-induced protein, putative [Theobroma cacao]	0.85	gi|75275086|sp|P93735.1|ELIP1_ARATH	RecName: Full=Early light-induced protein 1, chloroplastic; Flags: Precursor [Arabidopsis thaliana]	0.7	_	59689.scaffold_302736.1	annotation not avaliable	0.7881	_	_	NOG256691	None	_
Gh_A09G2067	0.5204	1.9084	5e-05	0.00199199	1.87467	-1.87467	773	gi|590661692|ref|XP_007035744.1|	Periplasmic beta-glucosidase, putative [Theobroma cacao]	0.91	gi|75262458|sp|Q9FGY1.1|BXL1_ARATH	RecName: Full=Beta-D-xylosidase 1; Short=AtBXL1; AltName: Full=Alpha-L-arabinofuranosidase; Flags: Precursor [Arabidopsis thaliana]	0.84	GO:0048046;GO:0010214;GO:0009505;GO:0004553;GO:0005975	3694.estExt_fgenesh4_pm.C_LG_X0551	hypothetical protein	0.9103	COG1472	_	_	None	_
Gh_D02G0799	0.654974	2.43094	0.00095	0.0210029	1.892	-1.892	372	gi|590599034|ref|XP_007019070.1|	GDSL-like Lipase/Acylhydrolase superfamily protein [Theobroma cacao]	0.9	gi|51315784|sp|Q7Y1X1.1|EST_HEVBR	RecName: Full=Esterase; AltName: Full=Early nodule-specific protein homolog; AltName: Full=Latex allergen Hev b 13; AltName: Allergen=Hev b 13; Flags: Precursor	0.79	GO:0008152;GO:0016788	3694.estExt_fgenesh4_pg.C_LG_V0965	hypothetical protein	0.8399	_	_	NOG247287;NOG287295	None	_
Gh_D02G2126	2.21119	8.26464	0.0014	0.0279147	1.90213	-1.90213	145	gi|590686062|ref|XP_007042270.1|	2Fe-2S ferredoxin-like superfamily protein, A,ATFD2 [Theobroma cacao]	0.85	gi|3023752|sp|Q43517.1|FER1_SOLLC	RecName: Full=Ferredoxin-1, chloroplastic; AltName: Full=Ferredoxin I; Flags: Precursor [Solanum lycopersicum]	0.81	GO:0009055;GO:0051537;GO:0022900;GO:0046872;GO:0006118	3694.estExt_fgenesh4_kg.C_1630003	SubName: Full=Putative uncharacterized protein;	0.8454	COG0633	_	_	K02639	petF
Gh_D04G0616	21.5686	80.8789	5e-05	0.00199199	1.90683	-1.90683	485	gi|590563163|ref|XP_007009290.1|	Regulator of chromosome condensation repeat-containing protein isoform 1 [Theobroma cacao]	0.93	gi|75171768|sp|Q9FN03.1|UVR8_ARATH	RecName: Full=Ultraviolet-B receptor UVR8; AltName: Full=Protein UV-B RESISTANCE 8; AltName: Full=RCC1 domain-containing protein UVR8 [Arabidopsis thaliana]	0.59	_	29760.GSVIVG00018415001	SubName: Full=Chromosome chr13 scaffold_17, whole genome shotgun sequence;	0.8944	COG5184	KOG1426	_	None	_
Gh_Sca017503G01	25.0237	94.9108	5e-05	0.00199199	1.92328	-1.92328	80	gi|358346026|ref|XP_003637074.1|	Cell wall-associated hydrolase, partial [Medicago truncatula]	1	gi|110816488|sp|Q3BAI2.1|YCX91_PHAAO	RecName: Full=Uncharacterized protein ORF91 (chloroplast) [Phalaenopsis aphrodite subsp. formosana]	1	GO:0016787;GO:0008152;GO:0009507	568703.LGG_01887	lipoprotein	0.8246	_	_	NOG69646	None	_
Gh_Sca048607G01	14.0334	53.4108	5e-05	0.00199199	1.92827	-1.92827	86	gi|159138935|gb|ABW89467.1|	low molecular weight heat shock protein [Gossypium hirsutum]	0.97	gi|232273|sp|P30221.1|HSP11_SOLLC	RecName: Full=17.8 kDa class I heat shock protein	0.95	_	3694.grail3.0066002801	hypothetical protein	0.9647	COG0071	KOG0710	_	K13993	HSP20
Gh_D06G0733	0.436419	1.67048	0.00055	0.0138713	1.93648	-1.93648	522	gi|590575910|ref|XP_007012819.1|	Cytokinin oxidase [Theobroma Cytokinin oxidase [Theobroma cacao]	0.88	gi|20138027|sp|Q9LTS3.1|CKX3_ARATH	RecName: Full=Cytokinin dehydrogenase 3; AltName: Full=Cytokinin oxidase 3; Short=AtCKX3; Short=CKO 3; Flags: Precursor [Arabidopsis thaliana]	0.77	GO:0019139;GO:0008762;GO:0006040;GO:0009823;GO:0008131;GO:0050660;GO:0055114	3694.gw1.VI.977.1	cytokinin oxidase (EC:1.5.99.12)	0.8041	COG0277	KOG1231	_	K00279	CKX
Gh_A05G1511	1.69286	6.58035	0.00235	0.0406241	1.9587	-1.9587	161	gi|119888002|gb|ABM05953.1|	proline-rich protein [Gossypium hirsutum]	0.64	_	_	_	_	_	_	_	_	_	_	None	_
Gh_D12G2767	1.0188	3.96942	0.0005	0.0129405	1.96206	-1.96206	281	gi|590699908|ref|XP_007046037.1|	NAC domain protein, IPR003441 [Theobroma cacao]	0.88	gi|50400809|sp|O49255.1|NAC29_ARATH	RecName: Full=NAC transcription factor 29; Short=AtNAC029; AltName: Full=Protein NAC-LIKE, ACTIVATED BY AP3/PI; Short=AtNAP [Arabidopsis thaliana]	0.91	GO:0005634;GO:0003677;GO:0010150;GO:0006355;GO:0009908;GO:0009825;GO:0005667;GO:0045449;GO:0045087;GO:0009617;GO:0003700	29760.GSVIVG00036931001	SubName: Full=Chromosome chr1 scaffold_84, whole genome shotgun sequence;	0.8115	_	_	NOG227842	None	_
Gh_D08G0923	0.856332	3.35379	0.00015	0.00504383	1.96955	-1.96955	368	gi|590580569|ref|XP_007014105.1|	Zinc finger protein CONSTANS-LIKE 5, putative [Theobroma cacao]	0.85	gi|52840166|sp|Q940T9.2|COL4_ARATH	RecName: Full=Zinc finger protein CONSTANS-LIKE 4 [Arabidopsis thaliana]	0.73	GO:0005667;GO:0006355;GO:0008270;GO:0045449;GO:0003700;GO:0042631	_	_	_	_	_	_	None	_
Gh_D13G1616	1.23922	4.89506	0.00165	0.0314576	1.98189	-1.98189	204	gi|590611774|ref|XP_007022199.1|	Glutathione S-transferase TAU 19 [Theobroma cacao]	0.88	gi|416652|sp|Q03666.1|GSTX4_TOBAC	RecName: Full=Probable glutathione S-transferase; AltName: Full=Auxin-induced protein PCNT107	0.81	GO:0004364;GO:0006749;GO:0006803	29760.GSVIVG00012190001	SubName: Full=Chromosome undetermined scaffold_356, whole genome shotgun sequence;	0.845	COG0625	KOG0406	_	K00799	GST, gst
Gh_D09G0974	0.416039	1.65338	0.00285	0.0464595	1.99063	-1.99063	402	gi|590586283|ref|XP_007015663.1|	Plant U-box 24, putative [Theobroma cacao]	0.86	gi|75148205|sp|Q84TG3.1|PUB23_ARATH	RecName: Full=E3 ubiquitin-protein ligase PUB23; AltName: Full=Plant U-box protein 23; AltName: Full=U-box domain-containing protein 23 [Arabidopsis thaliana]	0.61	GO:0016567;GO:0004842;GO:0016874	29760.GSVIVG00017518001	SubName: Full=Chromosome chr6 scaffold_15, whole genome shotgun sequence;	0.7953	_	KOG0167	_	None	_
Gh_D05G2696	2.13726	8.54227	5e-05	0.00199199	1.99886	-1.99886	266	gi|643733721|gb|KDP40564.1|	hypothetical protein JCGZ_24563 [Jatropha curcas]	0.58	_	_	_	_	3694.eugene3.00010231	SubName: Full=Putative uncharacterized protein;	0.7524	_	_	NOG221935	None	_
Gh_D01G0297	0.356992	1.43083	5e-05	0.00199199	2.00289	-2.00289	1070	gi|91208894|ref|YP_538927.1|	RNA polymerase beta subunit [Gossypium hirsutum]	1	gi|109903858|sp|Q2L8Z9.1|RPOB_GOSHI	RecName: Full=DNA-directed RNA polymerase subunit beta; AltName: Full=PEP; AltName: Full=Plastid-encoded RNA polymerase subunit beta; Short=RNA polymerase subunit	1	GO:0032549;GO:0003677;GO:0006351;GO:0003899;GO:0005730;GO:0006144;GO:0006206;GO:0009507	3702.ATCG00190.1-P	unknown protein; Chloroplast DNA-dependent RNA polymerase B subunit. The transcription of th [...]	0.9599	COG0085	KOG0214	_	K03043	rpoB
Gh_D11G0091	0	4.01573	5e-05	0.00199199	2.00566	-2.00566	99	gi|224122428|ref|XP_002318831.1|	Tapetum-specific protein A9 precursor [Populus trichocarpa]	0.82	gi|5902675|sp|Q43495.1|108_SOLLC	RecName: Full=Protein 108; Flags: Precursor [Solanum lycopersicum]	0.7	_	3694.grail3.0079006901	hypothetical protein	0.8152	_	_	NOG275013	None	_
Gh_A12G0821	1.6202	6.60114	0.00105	0.0226083	2.02654	-2.02654	168	gi|325210966|ref|YP_004286042.1|	ribosomal protein S3 [Gossypium ribosomal protein S3 (chloroplast) [Gossypium raimondii]	0.99	gi|91207768|sp|Q2L946.1|RR3_GOSHI	RecName: Full=30S ribosomal protein S3, chloroplastic (chloroplast) [Gossypium hirsutum]	0.99	GO:0042254;GO:0006412;GO:0005739;GO:0003735;GO:0015935;GO:0019843;GO:0009507	3702.ATCG00800.1-P	unknown protein; encodes a chloroplast ribosomal protein S3, a constituent of the small subu [...]	0.9691	COG0092	_	_	K02982	RP-S3, rpsC
Gh_D12G2593	2.09114	8.55696	5e-05	0.00199199	2.03281	-2.03281	470	gi|590666823|ref|XP_007037069.1|	Homeodomain-like superfamily protein, putative isoform 1 [Theobroma cacao]	0.8	gi|576017754|sp|F4KGY6.1|RVE1_ARATH	RecName: Full=Protein REVEILLE 1	0.7	GO:0003677;GO:0000785;GO:0003682	3694.eugene3.00120065	hypothetical protein	0.7821	_	KOG0724	_	None	_
Gh_A12G0217	2.52231	10.364	0.0004	0.0108938	2.03876	-2.03876	142	gi|313199742|ref|YP_004021356.1|	ribosomal protein L2 [Theobroma ribosomal protein L2 [Gossypium thurberi]	1	gi|118597127|sp|Q2L944.1|RK2_GOSHI	RecName: Full=50S ribosomal protein L2, chloroplastic (chloroplast) [Gossypium hirsutum]	1	GO:0042254;GO:0015934;GO:0006412;GO:0005739;GO:0016740;GO:0003735;GO:0019843;GO:0009507	3694.eugene3.187830002	SubName: Full=Putative uncharacterized protein;	0.9854	COG0090	KOG0438	_	K02886	RP-L2, MRPL2, rplB
Gh_A11G1659	4.58304	19.0784	5e-05	0.00199199	2.05756	-2.05756	148	gi|586673972|ref|XP_006837986.1|	hypothetical protein AMTR_s00102p00104790 [Amborella trichopoda]	0.9	_	_	_	_	29760.GSVIVG00001373001	SubName: Full=Chromosome undetermined scaffold_116, whole genome shotgun sequence;	0.9275	_	_	NOG280702	None	_
Gh_D02G1325	0	4.16752	0.0001	0.00360715	2.05919	-2.05919	79	gi|590698344|ref|XP_007045691.1|	Uncharacterized protein TCM_011388 [Theobroma cacao]	0.77	_	_	_	_	_	_	_	_	_	_	None	_
Gh_A12G2280	0.469135	1.97852	0.00045	0.0119291	2.07635	-2.07635	547	gi|590673670|ref|XP_007038959.1|	Sigma factor E isoform 1 [Theobroma cacao]	0.92	gi|75267675|sp|Q9ZNX9.1|SIGE_ARATH	RecName: Full=RNA polymerase sigma factor sigE, chloroplastic/mitochondrial; Short=Sigma factor E; Short=Sigma-E; AltName: Full=RNA polymerase sigma factor sig5; Sh	0.79	GO:0010264;GO:0003677;GO:0009637;GO:0009658;GO:0006352;GO:0045893;GO:0005667;GO:0010207;GO:0045449;GO:0001053;GO:0003700;GO:0009507	29760.GSVIVG00006496001	SubName: Full=Chromosome undetermined scaffold_171, whole genome shotgun sequence;	0.9375	COG0568	_	_	K03093	SIGMA70
Gh_D11G3198	0	4.34538	0.00125	0.0256779	2.11948	-2.11948	72	_	_	_	_	_	_	_	_	_	_	_	_	_	None	_
Gh_D02G2034	0.42863	1.89541	0.00125	0.0256779	2.14471	-2.14471	393	gi|590687168|ref|XP_007042587.1|	Progesterone 5-beta-reductase, putative isoform 2 [Theobroma cacao]	0.9	gi|75223330|sp|Q6PQJ9.1|5BPOR_DIGLA	RecName: Full=3-oxo-Delta(4,5)-steroid 5-beta-reductase; AltName: Full=Delta(4)-3-oxosteroid 5-beta-reductase; AltName: Full=Delta-4,5-steroid 5-beta-reductase; Sh	0.76	_	59689.scaffold_701910.1	annotation not avaliable	0.7629	_	_	NOG46937	None	_
Gh_A05G2828	2.66907	11.8703	0.00095	0.0210029	2.15295	-2.15295	123	gi|147835464|emb|CAN61119.1|	hypothetical protein VITISV_022570 [Vitis vinifera]	0.63	_	_	_	_	_	_	_	_	_	_	None	_
Gh_D11G2469	1.43393	6.45261	5e-05	0.00199199	2.16991	-2.16991	357	gi|206584347|gb|ACI15346.1|	NAC domain protein NAC5 [Gossypium NAC domain protein NAC5 [Gossypium hirsutum]	0.99	gi|50401213|sp|Q9ZNU2.1|NAC18_ARATH	RecName: Full=NAC domain-containing protein 18; Short=ANAC018; AltName: Full=Protein NO APICAL MERISTEM; Short=AtNAM [Arabidopsis thaliana]	0.82	GO:0005634;GO:0003677;GO:0010260;GO:0006355;GO:0006865;GO:0005667;GO:0003700;GO:0045449	3694.gw1.XIII.1912.1	NAC domain protein, IPR003441	0.9012	_	_	NOG227842	None	_
Gh_D07G1030	3.03755	13.814	5e-05	0.00199199	2.18515	-2.18515	575	gi|590587838|ref|XP_007016070.1|	Glutamine-dependent asparagine synthase 1 [Theobroma cacao]	0.95	gi|1351983|sp|P49092.2|ASNS1_LOTJA	RecName: Full=Asparagine synthetase [glutamine-hydrolyzing]	0.91	GO:0006522;GO:0006531;GO:0009063;GO:0009646;GO:0006529;GO:0004066	3694.estExt_Genewise1_v1.C_LG_IX3026	asparagine synthase (glutamine-hydrolyzing) (EC:6.3.5.4)	0.9342	COG0367	KOG0571	_	K01953	asnB, ASNS
Gh_D01G1180	5.83954	26.7815	5e-05	0.00199199	2.19731	-2.19731	178	gi|527209896|gb|EPS74505.1|	hypothetical protein M569_00222, partial [Genlisea aurea]	0.85	_	_	_	_	29760.GSVIVG00001373001	SubName: Full=Chromosome undetermined scaffold_116, whole genome shotgun sequence;	0.9275	_	_	NOG280702	None	_
Gh_A03G1169	3.70444	17.1276	5e-05	0.00199199	2.209	-2.209	138	gi|429465362|gb|AFZ85288.1|	ATP synthase subunit 1, partial (mitochondrion) [Gossypium hirsutum]	1	gi|114404|sp|P18260.1|ATPAM_HELAN	RecName: Full=ATP synthase subunit alpha, mitochondrial (mitochondrion) [Helianthus annuus]	1	GO:0045261;GO:0005524;GO:0015986;GO:0006119;GO:0015991;GO:0005739;GO:0046961;GO:0046933	39946.BGIOSIBSE038224	ATP synthase subunit alpha, mitochondrial; Mitochondrial membrane ATP synthase (F(1)F(0) ATP [...]	1	COG0056	KOG1353	_	K02132	ATPeF1A, ATP5A1
Gh_D12G2183	0	4.65435	0.00315	0.0498782	2.21858	-2.21858	66	_	_	_	_	_	_	_	_	_	_	_	_	_	None	_
Gh_A11G0166	1.19773	5.64932	5e-05	0.00199199	2.23777	-2.23777	417	gi|593104731|ref|XP_007131476.1|	hypothetical protein PHAVU_011G016800g [Phaseolus vulgaris]	0.82	gi|2501572|sp|Q40863.1|EMB8_PICGL	RecName: Full=Embryogenesis-associated protein EMB8 [Picea glauca]	0.8	GO:0016787;GO:0008152	29760.GSVIVG00000521001	SubName: Full=Chromosome chr2 scaffold_105, whole genome shotgun sequence;	0.8415	COG0429	KOG1838	_	None	_
Gh_A05G1616	0.492208	2.32332	0.00165	0.0314576	2.23885	-2.23885	309	gi|590593837|ref|XP_007017685.1|	Salt tolerance 2, putative isoform 1 [Theobroma cacao]	0.88	gi|17433066|sp|Q9LQZ7.1|STHX_ARATH	RecName: Full=Probable salt tolerance-like protein At1g75540 [Arabidopsis thaliana]	0.86	GO:0009641;GO:0005667;GO:0006355;GO:0008270;GO:0045449;GO:0003700	3694.eugene3.00020256	hypothetical protein	0.9381	_	KOG1601	_	None	_
Gh_D06G0160	0	4.9831	5e-05	0.00199199	2.31704	-2.31704	79	gi|325210985|ref|YP_004286029.1|	clp protease proteolytic subunit [Gossypium thurberi]	0.99	gi|122201402|sp|Q2L926.1|CLPP_GOSHI	RecName: Full=ATP-dependent Clp protease proteolytic subunit; AltName: Full=Endopeptidase Clp (chloroplast) [Gossypium hirsutum]	0.96	GO:0004252;GO:0006508;GO:0009570	59689.fgenesh2_kg.2__689__ATCG00670.1	annotation not avaliable	0.961	COG0740	KOG0840	_	K01358	clpP, CLPP
Gh_D05G3263	0.219563	1.09467	0.00035	0.00983058	2.31779	-2.31779	915	gi|590611096|ref|XP_007022004.1|	Trehalose-6-phosphate synthase isoform 1 [Theobroma cacao]	0.93	gi|75213463|sp|Q9SYM4.1|TPS1_ARATH	RecName: Full=Alpha,alpha-trehalose-phosphate synthase [UDP-forming]	0.91	GO:0005982;GO:0005992;GO:0005985;GO:0010182;GO:0009664;GO:0003825;GO:0051301;GO:0009832;GO:0009793	3694.estExt_fgenesh4_pg.C_1680018	hypothetical protein	0.9655	COG0380;COG1877	KOG1050	_	K16055	TPS
Gh_A04G0990	5.66931	28.6135	5e-05	0.00199199	2.33545	-2.33545	144	gi|527209896|gb|EPS74505.1|	hypothetical protein M569_00222, partial [Genlisea aurea]	0.85	_	_	_	_	29760.GSVIVG00001373001	SubName: Full=Chromosome undetermined scaffold_116, whole genome shotgun sequence;	0.9275	_	_	NOG280702	None	_
Gh_D07G0614	1.51045	7.63428	5e-05	0.00199199	2.33751	-2.33751	424	gi|590666823|ref|XP_007037069.1|	Homeodomain-like superfamily protein, putative isoform 1 [Theobroma cacao]	0.83	gi|576017754|sp|F4KGY6.1|RVE1_ARATH	RecName: Full=Protein REVEILLE 1	0.68	GO:0003677;GO:0000785;GO:0003682	3694.eugene3.00120065	hypothetical protein	0.7877	_	KOG0724	_	None	_
Gh_Sca078114G01	0	5.06822	5e-05	0.00199199	2.34148	-2.34148	95	gi|325210916|ref|YP_004285990.1|	ATP synthase CF0 subunit I [Gossypium thurberi]	1	gi|122201382|sp|Q2L8Z3.1|ATPF_GOSHI	RecName: Full=ATP synthase subunit b, chloroplastic; AltName: Full=ATP synthase F(0) sector subunit b; AltName: Full=ATPase subunit I (chloroplast) [Gossypium hirs	1	GO:0015986;GO:0009535;GO:0045263;GO:0016021;GO:0046933	3694.gw1.3408.1.1	ATP synthase CF0 subunit I ; F(1)F(0) ATP synthase produces ATP from ADP in the presence of [...]	0.9524	COG0711	_	NOG233487	K02109	ATPF0B, atpF
Gh_D09G1409	7.02985	35.8068	5e-05	0.00199199	2.34867	-2.34867	285	gi|164668308|gb|ABK60195.2|	PIP2 protein [Gossypium hirsutum]	0.96	gi|1175013|sp|P43286.1|PIP21_ARATH	RecName: Full=Aquaporin PIP2-1; AltName: Full=Plasma membrane intrinsic protein 2-1; Short=AtPIP2;1; AltName: Full=Plasma membrane intrinsic protein 2a; Short=PIP2a	0.9	GO:0006810;GO:0016021;GO:0005215	3694.estExt_Genewise1_v1.C_LG_XVI2799	SubName: Full=Putative uncharacterized protein;	0.9433	COG0580	KOG0223	_	K09872	PIP
Gh_D06G2326	9.27354	47.8901	5e-05	0.00199199	2.36854	-2.36854	141	gi|590574337|ref|XP_007012373.1|	17.6 kDa class II heat shock protein [Theobroma cacao]	0.94	gi|232274|sp|P29830.1|HS176_ARATH	RecName: Full=17.6 kDa class II heat shock protein; AltName: Full=17.6 kDa heat shock protein; Short=AtHsp17.6 [Arabidopsis thaliana]	0.88	_	29760.GSVIVG00032242001	SubName: Full=Chromosome chr4 scaffold_6, whole genome shotgun sequence;	0.8571	COG0071	KOG0710	_	K13993	HSP20
Gh_Sca011730G01	0.19151	0.994519	0.0023	0.0399977	2.37658	-2.37658	660	gi|91208893|ref|YP_538926.1|	RNA polymerase beta' subunit [Gossypium hirsutum]	0.99	gi|122226160|sp|Q2L8Z4.1|RPOC1_GOSHI	RecName: Full=DNA-directed RNA polymerase subunit beta'; AltName: Full=PEP; AltName: Full=Plastid-encoded RNA polymerase subunit beta'; Short=RNA polymerase subun	0.99	GO:0003899;GO:0003677;GO:0005730;GO:0006144;GO:0006206;GO:0006351;GO:0009507	3702.ATCG00180.1-P	unknown protein; RNA polymerase beta' subunit-1 ; DNA-dependent RNA polymerase catalyzes the [...]	0.9507	COG0086	KOG0261	_	K03046	rpoC
Gh_D12G1184	12.2736	63.8502	5e-05	0.00199199	2.37913	-2.37913	736	gi|590720674|ref|XP_007051395.1|	Homeodomain-like superfamily protein isoform 1 [Theobroma cacao]	0.85	gi|75319073|sp|P92973.1|CCA1_ARATH	RecName: Full=Protein CCA1; AltName: Full=MYB-related transcription factor CCA1; AltName: Full=Protein CIRCADIAN CLOCK ASSOCIATED 1 [Arabidopsis thaliana]	0.72	GO:0042754;GO:0000785;GO:0009409;GO:0043433;GO:0044212;GO:0048574;GO:0003682;GO:0005667;GO:0045449;GO:0003700;GO:0009639	_	_	_	_	_	_	K12133	LHY
Gh_Sca011757G01	1.91965	10.0533	0.00265	0.0442263	2.38875	-2.38875	124	gi|253760055|ref|XP_002488965.1|	hypothetical protein SORBIDRAFT_1138s002030 [Sorghum bicolor]	0.89	_	_	_	_	39947.LOC_Os09g01000.1	expressed protein	0.898	_	_	NOG252044	None	_
Gh_A12G1685	0.764744	4.13111	0.0002	0.00632409	2.43348	-2.43348	331	gi|255547107|ref|XP_002514611.1|	Flavonol 3-sulfotransferase, putative [Ricinus communis]	0.76	gi|75169684|sp|Q9C9D0.1|SOT16_ARATH	RecName: Full=Cytosolic sulfotransferase 16; Short=AtSOT16; AltName: Full=Desulfoglucosinolate sulfotransferase A; Short=AtST5a; AltName: Full=Protein CORONATINE I	0.67	GO:0016740	_	_	_	_	_	_	None	_
Gh_D01G1128	0.835979	4.58374	5e-05	0.00199199	2.45499	-2.45499	391	gi|620598342|gb|AHY20331.1|	cytochrome c biogenesis protein FC1 (mitochondrion) (mitochondrion) [Brassica juncea var. tumida]	0.91	gi|44887776|sp|P93286.2|CCMF_ARATH	RecName: Full=Putative cytochrome c biogenesis ccmF-like mitochondrial protein (mitochondrion) [Arabidopsis thaliana]	0.91	GO:0005739	3694.gw1.17434.1.1	hypothetical protein	0.9504	_	_	NOG239784	None	_
Gh_D06G0931	2.62112	14.6689	5e-05	0.00199199	2.48451	-2.48451	177	gi|658025511|ref|XP_008348155.1|	PREDICTED: lysosomal alpha-mannosidase-like [Malus domestica]	0.75	_	_	_	_	39947.LOC_Os09g01000.1	expressed protein	0.775	_	_	NOG252044	None	_
Gh_Sca129338G01	41.8225	235.339	5e-05	0.00199199	2.49239	-2.49239	76	gi|669030175|emb|CDM84612.1|	unnamed protein product [Triticum aestivum]	0.97	_	_	_	_	_	_	_	_	_	_	None	_
Gh_D13G0093	1.43398	8.12868	0.0001	0.00360715	2.503	-2.503	211	gi|590567281|ref|XP_007010471.1|	Nuclear transport factor 2 family protein [Theobroma cacao]	0.9	_	_	_	GO:0005886	3694.estExt_fgenesh4_pg.C_LG_X2242	hypothetical protein	0.8855	_	_	NOG233643;NOG281285	None	_
Gh_D05G3427	0	5.70722	5e-05	0.00199199	2.51279	-2.51279	75	_	_	_	_	_	_	_	_	_	_	_	_	_	None	_
Gh_A12G1061	13.0584	75.0283	5e-05	0.00199199	2.52246	-2.52246	736	gi|590720674|ref|XP_007051395.1|	Homeodomain-like superfamily protein isoform 1 [Theobroma cacao]	0.86	gi|269969425|sp|Q6R0H1.2|LHY_ARATH	RecName: Full=Protein LHY; AltName: Full=MYB-related transcription factor LHY; AltName: Full=Protein LATE ELONGATED HYPOCOTYL [Arabidopsis thaliana]	0.56	GO:0042754;GO:0000785;GO:0009409;GO:0043433;GO:0044212;GO:0048574;GO:0003682;GO:0005667;GO:0045449;GO:0003700;GO:0009639	_	_	_	_	_	_	K12133	LHY
Gh_D04G1995	5.54152	32.5578	5e-05	0.00199199	2.55465	-2.55465	133	gi|357436101|ref|XP_003588326.1|	ATP synthase subunit alpha [Medicago truncatula]	0.91	_	_	_	_	29760.GSVIVG00001373001	SubName: Full=Chromosome undetermined scaffold_116, whole genome shotgun sequence;	0.7917	_	_	NOG280702	K02132	ATPeF1A, ATP5A1
Gh_D06G1912	1.17219	7.02049	5e-05	0.00199199	2.58237	-2.58237	238	gi|590569498|ref|XP_007011087.1|	Ribonuclease 2, putative [Theobroma cacao]	0.59	gi|1173103|sp|P42813.1|RNS1_ARATH	RecName: Full=Ribonuclease 1; Flags: Precursor [Arabidopsis thaliana]	0.43	_	_	_	_	_	_	_	K01166	E3.1.27.1
Gh_A11G1949	0	6.12195	0.0011	0.0234005	2.61399	-2.61399	65	gi|587905935|gb|EXB94046.1|	hypothetical protein L484_009390 [Morus notabilis]	0.68	_	_	_	_	_	_	_	_	_	_	None	_
Gh_A13G2212	0.322769	1.98977	0.00055	0.0138713	2.62403	-2.62403	507	gi|91208887|ref|YP_538920.1|	ATP synthase CF1 alpha subunit [Gossypium hirsutum]	1	gi|110832063|sp|Q2L8Z1.1|ATPA_GOSHI	RecName: Full=ATP synthase subunit alpha, chloroplastic; AltName: Full=ATP synthase F1 sector subunit alpha; AltName: Full=F-ATPase subunit alpha (chloroplast) [Go	1	GO:0045261;GO:0009535;GO:0005524;GO:0015986;GO:0006119;GO:0015991;GO:0046961;GO:0046933	29760.GSVIVG00035586001	RecName: Full=ATP synthase subunit alpha; Short=ATPase subunit alpha; EC=3.6.3.14; AltName: [...]	0.9723	COG0056	KOG1353	_	K02111	ATPF1A, atpA
Gh_Sca004992G01	1.53226	9.49682	0.00175	0.0328852	2.63178	-2.63178	124	gi|253760055|ref|XP_002488965.1|	hypothetical protein SORBIDRAFT_1138s002030 [Sorghum bicolor]	0.89	_	_	_	_	39947.LOC_Os09g01000.1	expressed protein	0.898	_	_	NOG252044	None	_
Gh_D05G3132	1.41909	8.97433	0.00315	0.0498782	2.66084	-2.66084	124	gi|253760055|ref|XP_002488965.1|	hypothetical protein SORBIDRAFT_1138s002030 [Sorghum bicolor]	0.89	_	_	_	_	39947.LOC_Os09g01000.1	expressed protein	0.898	_	_	NOG252044	None	_
Gh_D06G0518	1.61321	10.7817	5e-05	0.00199199	2.74058	-2.74058	243	gi|397911877|gb|AFO69209.1|	ATP synthase F1 subunit 1 (mitochondrion) [Gossypium hirsutum]	1	gi|114404|sp|P18260.1|ATPAM_HELAN	RecName: Full=ATP synthase subunit alpha, mitochondrial (mitochondrion) [Helianthus annuus]	0.97	GO:0045261;GO:0005524;GO:0015986;GO:0006119;GO:0015991;GO:0005739;GO:0046961;GO:0046933	3694.gw1.20770.4.1	hypothetical protein	0.9333	COG0056	KOG1353	_	K02132	ATPeF1A, ATP5A1
Gh_Sca009741G01	286.554	1934.48	5e-05	0.00199199	2.75507	-2.75507	55	gi|303291422|ref|XP_003064996.1|	predicted protein [Micromonas pusilla CCMP1545]	1	_	_	_	_	4558.Sb01g024170.1	hypothetical protein	1	_	_	NOG114628	None	_
Gh_Sca004811G01	1.49096	10.1684	0.00225	0.0393638	2.76978	-2.76978	124	gi|253760055|ref|XP_002488965.1|	hypothetical protein SORBIDRAFT_1138s002030 [Sorghum bicolor]	0.89	_	_	_	_	39947.LOC_Os09g01000.1	expressed protein	0.898	_	_	NOG252044	None	_
Gh_A07G1695	1.56526	10.85	0.0021	0.037429	2.79322	-2.79322	124	gi|253760055|ref|XP_002488965.1|	hypothetical protein SORBIDRAFT_1138s002030 [Sorghum bicolor]	0.89	_	_	_	_	39947.LOC_Os09g01000.1	expressed protein	0.898	_	_	NOG252044	None	_
Gh_A09G2466	0.957915	6.7863	0.00105	0.0226083	2.82466	-2.82466	168	gi|325210966|ref|YP_004286042.1|	ribosomal protein S3 [Gossypium ribosomal protein S3 (chloroplast) [Gossypium raimondii]	1	gi|91207768|sp|Q2L946.1|RR3_GOSHI	RecName: Full=30S ribosomal protein S3, chloroplastic (chloroplast) [Gossypium hirsutum]	1	GO:0042254;GO:0006412;GO:0005739;GO:0003735;GO:0015935;GO:0019843;GO:0009507	3702.ATCG00800.1-P	unknown protein; encodes a chloroplast ribosomal protein S3, a constituent of the small subu [...]	0.976	COG0092	_	_	K02982	RP-S3, rpsC
Gh_A08G2446	4.68635	33.8752	5e-05	0.00199199	2.85369	-2.85369	155	gi|357436101|ref|XP_003588326.1|	ATP synthase subunit alpha [Medicago truncatula]	0.63	_	_	_	_	_	_	_	_	_	_	K02132	ATPeF1A, ATP5A1
Gh_A05G2829	54.56	399.874	5e-05	0.00199199	2.87363	-2.87363	125	gi|253760055|ref|XP_002488965.1|	hypothetical protein SORBIDRAFT_1138s002030 [Sorghum bicolor]	0.89	_	_	_	_	4558.Sb1138s002030.1	hypothetical protein	0.898	_	_	NOG252044	None	_
Gh_A05G2731	105.406	786.216	5e-05	0.00199199	2.89897	-2.89897	124	gi|253760055|ref|XP_002488965.1|	hypothetical protein SORBIDRAFT_1138s002030 [Sorghum bicolor]	0.82	_	_	_	_	39947.LOC_Os09g01000.1	expressed protein	0.8265	_	_	NOG252044	None	_
Gh_Sca009984G01	228.745	1721.67	5e-05	0.00199199	2.912	-2.912	55	gi|303291422|ref|XP_003064996.1|	predicted protein [Micromonas pusilla CCMP1545]	1	_	_	_	_	4558.Sb01g024170.1	hypothetical protein	1	_	_	NOG114628	None	_
Gh_D11G0743	0.363236	2.73657	0.00155	0.0301162	2.91339	-2.91339	318	gi|441038071|gb|AGC27315.1|	NAC domain protein 12 [Gossypium hirsutum]	0.98	gi|75171471|sp|Q9FLJ2.1|NC100_ARATH	RecName: Full=NAC domain-containing protein 100; Short=ANAC100; Short=AtNAC5 [Arabidopsis thaliana]	0.92	GO:0005634;GO:0003677;GO:0006355	59689.fgenesh2_kg.5__665__AT3G29035.1	annotation not avaliable	0.8	_	_	NOG257939;NOG254702;NOG271129	None	_
Gh_D06G0517	7.13705	54.9205	5e-05	0.00199199	2.94394	-2.94394	247	gi|255590094|ref|XP_002535169.1|	conserved hypothetical protein [Ricinus communis]	1	_	_	_	_	_	_	_	_	_	_	K02132	ATPeF1A, ATP5A1
Gh_A05G2826	277.334	2204.39	5e-05	0.00199199	2.99068	-2.99068	124	gi|253760055|ref|XP_002488965.1|	hypothetical protein SORBIDRAFT_1138s002030 [Sorghum bicolor]	0.89	_	_	_	_	39947.LOC_Os09g01000.1	expressed protein	0.898	_	_	NOG252044	None	_
Gh_A07G1697	0	0.817102	0.0028	0.0458657	3.03052	-3.03052	124	gi|253760055|ref|XP_002488965.1|	hypothetical protein SORBIDRAFT_1138s002030 [Sorghum bicolor]	0.85	_	_	_	_	4558.Sb1138s002030.1	hypothetical protein	0.8469	_	_	NOG252044	None	_
Gh_Sca018899G01	1.22331	10.0533	0.00225	0.0393638	3.03881	-3.03881	124	gi|253760055|ref|XP_002488965.1|	hypothetical protein SORBIDRAFT_1138s002030 [Sorghum bicolor]	0.89	_	_	_	_	39947.LOC_Os09g01000.1	expressed protein	0.898	_	_	NOG252044	None	_
Gh_Sca184569G01	650.777	5414.17	5e-05	0.00199199	3.05651	-3.05651	53	gi|443733918|gb|ELU18102.1|	hypothetical protein CAPTEDRAFT_143611, partial [Capitella teleta]	0.98	_	_	_	_	_	_	_	_	_	_	None	_
Gh_D11G3197	0	0.84064	5e-05	0.00199199	3.07149	-3.07149	209	gi|119368557|ref|YP_913244.1|	hypothetical protein GobaCp080 [Gossypium barbadense]	0.99	gi|118574750|sp|Q2L951.1|YCF1_GOSHI	RecName: Full=Putative membrane protein ycf1; Short=RF1 (chloroplast) [Gossypium hirsutum]	0.99	GO:0016021;GO:0015031;GO:0009706	_	_	_	_	_	_	None	_
Gh_A12G2477	0.590614	5.01328	0.00015	0.00504383	3.08547	-3.08547	301	gi|590663408|ref|XP_007036209.1|	Carbonic anhydrase 2, CA2 [Theobroma cacao]	0.78	gi|1168746|sp|P46511.1|CAHX_FLABR	RecName: Full=Carbonic anhydrase; AltName: Full=Carbonate dehydratase	0.71	GO:0016829	3694.eugene3.00150550	hypothetical protein	0.7569	COG0288	KOG1578	_	K01673	cynT, can
Gh_A05G2830	246.867	2124.13	5e-05	0.00199199	3.10507	-3.10507	124	gi|253760055|ref|XP_002488965.1|	hypothetical protein SORBIDRAFT_1138s002030 [Sorghum bicolor]	0.89	_	_	_	_	39947.LOC_Os09g01000.1	expressed protein	0.898	_	_	NOG252044	None	_
Gh_Sca014836G01	367.662	3167.05	5e-05	0.00199199	3.10669	-3.10669	85	gi|543177544|gb|AGV54793.1|	hypothetical protein [Phaseolus vulgaris]	0.96	_	_	_	_	_	_	_	_	_	_	None	_
Gh_A07G1696	16.1267	139.103	5e-05	0.00199199	3.10863	-3.10863	189	gi|658025511|ref|XP_008348155.1|	PREDICTED: lysosomal alpha-mannosidase-like [Malus domestica]	0.84	_	_	_	_	39947.LOC_Os09g01000.1	expressed protein	0.8936	_	_	NOG252044;NOG257205	None	_
Gh_D08G1011	0.208258	1.79721	0.00185	0.0342025	3.10932	-3.10932	507	gi|91208887|ref|YP_538920.1|	ATP synthase CF1 alpha subunit [Gossypium hirsutum]	1	gi|110832063|sp|Q2L8Z1.1|ATPA_GOSHI	RecName: Full=ATP synthase subunit alpha, chloroplastic; AltName: Full=ATP synthase F1 sector subunit alpha; AltName: Full=F-ATPase subunit alpha (chloroplast) [Go	1	GO:0045261;GO:0009535;GO:0005524;GO:0015986;GO:0006119;GO:0015991;GO:0046961;GO:0046933	29760.GSVIVG00035586001	RecName: Full=ATP synthase subunit alpha; Short=ATPase subunit alpha; EC=3.6.3.14; AltName: [...]	0.9723	COG0056	KOG1353	_	K02111	ATPF1A, atpA
Gh_A05G2062	0	0.864406	5e-05	0.00199199	3.11171	-3.11171	203	gi|590600481|ref|XP_007019467.1|	Vacuolar iron transporter family protein [Theobroma cacao]	0.9	gi|75273969|sp|Q9LSF6.1|VTH21_ARATH	RecName: Full=Vacuolar iron transporter homolog 2.1; AltName: Full=Protein NODULIN-LIKE 21 [Arabidopsis thaliana]	0.79	_	3694.gw1.II.1915.1	hypothetical protein	0.9718	COG1814	KOG4473	_	None	_
Gh_Sca020398G01	5.03067	44.2594	0.0001	0.00360715	3.13716	-3.13716	85	gi|543177544|gb|AGV54793.1|	hypothetical protein [Phaseolus vulgaris]	0.94	_	_	_	_	_	_	_	_	_	_	None	_
Gh_A11G1664	0.124372	1.1353	5e-05	0.00199199	3.19034	-3.19034	1525	gi|372291021|ref|YP_005087779.1|	RNA polymerase beta'' subunit (chloroplast) [Gossypium darwinii]	0.99	gi|125987657|sp|A0ZZ25.1|RPOC2_GOSBA	RecName: Full=DNA-directed RNA polymerase subunit beta''; AltName: Full=PEP; AltName: Full=Plastid-encoded RNA polymerase subunit beta''; Short=RNA polymerase sub	0.99	GO:0003899;GO:0003677;GO:0005730;GO:0006144;GO:0006206;GO:0006351;GO:0009507	3702.ATCG00170.1-P	unknown protein; RNA polymerase beta' subunit-2 ; DNA-dependent RNA polymerase catalyzes the [...]	0.9408	COG0086	KOG0262	_	K03046	rpoC
Gh_A05G2831	167.346	1527.59	5e-05	0.00199199	3.19035	-3.19035	124	gi|253760055|ref|XP_002488965.1|	hypothetical protein SORBIDRAFT_1138s002030 [Sorghum bicolor]	0.89	_	_	_	_	39947.LOC_Os09g01000.1	expressed protein	0.898	_	_	NOG252044	None	_
Gh_A12G1505	0.347877	3.18869	0.0019	0.0348344	3.19631	-3.19631	281	gi|590699908|ref|XP_007046037.1|	NAC domain protein, IPR003441 [Theobroma cacao]	0.88	gi|50400809|sp|O49255.1|NAC29_ARATH	RecName: Full=NAC transcription factor 29; Short=AtNAC029; AltName: Full=Protein NAC-LIKE, ACTIVATED BY AP3/PI; Short=AtNAP [Arabidopsis thaliana]	0.91	GO:0005634;GO:0003677;GO:0010150;GO:0006355;GO:0009908;GO:0009825;GO:0005667;GO:0045449;GO:0045087;GO:0009617;GO:0003700	29760.GSVIVG00036931001	SubName: Full=Chromosome chr1 scaffold_84, whole genome shotgun sequence;	0.8154	_	_	NOG227842	None	_
Gh_Sca004811G02	1.09572	10.1268	0.00285	0.0464595	3.20823	-3.20823	124	gi|253760055|ref|XP_002488965.1|	hypothetical protein SORBIDRAFT_1138s002030 [Sorghum bicolor]	0.89	_	_	_	_	39947.LOC_Os09g01000.1	expressed protein	0.898	_	_	NOG252044	None	_
Gh_A13G1728	1.09909	10.6057	5e-05	0.00199199	3.27046	-3.27046	333	gi|593705162|ref|XP_007152945.1|	hypothetical protein PHAVU_004G173600g [Phaseolus vulgaris]	0.73	gi|75220226|sp|O82199.1|C3H20_ARATH	RecName: Full=Zinc finger CCCH domain-containing protein 20; Short=AtC3H20 [Arabidopsis thaliana]	0.72	_	59689.fgenesh2_kg.7__1270__AT4G29190.1	annotation not avaliable	0.7778	_	KOG1595	_	None	_
Gh_A04G0434	0	0.970451	5e-05	0.00199199	3.27866	-3.27866	257	gi|590613281|ref|XP_007022619.1|	Short-chain dehydrogenase-reductase B [Theobroma cacao]	0.94	gi|66774119|sp|Q9LTV6.1|DECR2_ARATH	RecName: Full=Peroxisomal 2,4-dienoyl-CoA reductase [Arabidopsis thaliana]	0.9	GO:0055114;GO:0016491	29760.GSVIVG00002063001	SubName: Full=Chromosome chr19 scaffold_126, whole genome shotgun sequence;	0.9146	COG1028	KOG0725	_	K13237	DECR2
Gh_D07G2205	0.289648	2.8524	0.0001	0.00360715	3.2998	-3.2998	498	gi|590649290|ref|XP_007032370.1|	DNAse I-like superfamily protein isoform 1 [Theobroma cacao]	0.9	gi|259016256|sp|Q9LR47.2|IP5P3_ARATH	RecName: Full=Type I inositol 1,4,5-trisphosphate 5-phosphatase CVP2; AltName: Full=Protein COTYLEDON VASCULAR PATTERN 2 [Arabidopsis thaliana]	0.69	GO:0046856	29760.GSVIVG00020841001	SubName: Full=Chromosome chr14 scaffold_21, whole genome shotgun sequence;	0.936	COG5411	KOG0565	_	None	_
Gh_D08G1283	0	0.999149	5e-05	0.00199199	3.3207	-3.3207	154	gi|590718168|ref|XP_007050755.1|	Uncharacterized protein TCM_004513 [Theobroma cacao]	0.61	gi|229485498|sp|A8QD31.2|ERB1_MALGO	RecName: Full=Ribosome biogenesis protein ERB1; AltName: Full=Eukaryotic ribosome biogenesis protein 1	0.53	_	_	_	_	_	_	_	None	_
Gh_A11G0926	3.79387	45.2853	5e-05	0.00199199	3.5773	-3.5773	812	gi|641867960|gb|KDO86644.1|	hypothetical protein CISIN_1g004262mg [Citrus sinensis]	0.76	gi|269969425|sp|Q6R0H1.2|LHY_ARATH	RecName: Full=Protein LHY; AltName: Full=MYB-related transcription factor LHY; AltName: Full=Protein LATE ELONGATED HYPOCOTYL [Arabidopsis thaliana]	0.72	GO:0042754;GO:0000785;GO:0009409;GO:0043433;GO:0044212;GO:0048574;GO:0003682;GO:0005667;GO:0045449;GO:0003700;GO:0009639	_	_	_	_	_	_	K12133	LHY
Gh_A05G2835	1.25019	14.9548	0.00125	0.0256779	3.58039	-3.58039	124	gi|253760055|ref|XP_002488965.1|	hypothetical protein SORBIDRAFT_1138s002030 [Sorghum bicolor]	0.89	_	_	_	_	39947.LOC_Os09g01000.1	expressed protein	0.898	_	_	NOG252044	None	_
Gh_A05G2834	2.03282	25.7416	5e-05	0.00199199	3.66255	-3.66255	124	gi|253760055|ref|XP_002488965.1|	hypothetical protein SORBIDRAFT_1138s002030 [Sorghum bicolor]	0.89	_	_	_	_	39947.LOC_Os09g01000.1	expressed protein	0.898	_	_	NOG252044	None	_
Gh_Sca005000G02	0.971524	12.8045	0.0029	0.0470004	3.72026	-3.72026	122	gi|147835464|emb|CAN61119.1|	hypothetical protein VITISV_022570 [Vitis vinifera]	0.83	_	_	_	_	4558.Sb01g024170.1	hypothetical protein	0.9592	_	_	NOG114628	None	_
Gh_D11G1068	2.61288	37.422	5e-05	0.00199199	3.84017	-3.84017	965	gi|590720674|ref|XP_007051395.1|	Homeodomain-like superfamily protein isoform 1 [Theobroma cacao]	0.82	gi|269969425|sp|Q6R0H1.2|LHY_ARATH	RecName: Full=Protein LHY; AltName: Full=MYB-related transcription factor LHY; AltName: Full=Protein LATE ELONGATED HYPOCOTYL [Arabidopsis thaliana]	0.72	GO:0042754;GO:0000785;GO:0009409;GO:0043433;GO:0044212;GO:0048574;GO:0003682;GO:0005667;GO:0045449;GO:0003700;GO:0009639	_	_	_	_	_	_	K12133	LHY
Gh_A03G0958	0.139462	5.17674	0.00125	0.0256779	5.2141	-5.2141	547	gi|113029|sp|P17069.1|ACEA_GOSHI	RecName: Full=Isocitrate lyase; Short=ICL; Short=Isocitrase; Short=Isocitratase [Gossypium unnamed protein product [Gossypium hirsu	0.97	gi|113029|sp|P17069.1|ACEA_GOSHI	RecName: Full=Isocitrate lyase; Short=ICL; Short=Isocitrase; Short=Isocitratase [Gossypium hirsutum]	0.97	GO:0006099;GO:0046872;GO:0006097;GO:0010162;GO:0009514;GO:0004451	3694.eugene3.00070229	isocitrate lyase (EC:4.1.3.1)	0.9628	COG2224	KOG1260	_	K01637	E4.1.3.1, aceA

## Sheet: Sheet2
ID	root	stem	leaf	pistil	stamen	petal	5dpa_fibre	10dpa_fibre	20dpa_fibre	25dpa_fibre
Gh_A07G1269	1.11	0.52	2.57	0.6	0.089	0.18	2.5	2.5	1.68	3.2
Gh_D07G1380	1.07	1.89	2.89	1.34	0.67	0.26	2.15	2.26	2.1	3.4
Gh_A01G0244	1.34	1.77	0.96	1.29	0.74	0.085	0.81	0.84	1.4	1
Gh_A01G1766	0.18	0.15	0.34	0.25	0	0.04	0.22	0.135	0.45	0.1
Gh_A02G0176	0.9	0.91	1.46	1.59	0.62	0.21	1.58	0.85	1.07	1.24
Gh_A04G0600	0.43	0.52	0.31	0.43	0	0	0.89	0.18	0.49	0.266
Gh_A04G1004	7.54	9.26	8.15	5.44	3.19	3.1	6.1	5.8	4.45	9.2
Gh_A06G0016	3.22	1.35	2	1.97	0	0.08	2.1	2.08	10.7	4
Gh_A07G1888	1.92	1.47	0.93	0.74	2.18	0.27	0.5	0.28	0.82	0.73
Gh_A07G2181	0.24	0.92	0.67	1.08	0.14	0.09	0.77	1.12	0.81	0.75
Gh_A12G0451	4.01	2.86	3.29	3.29	2.12	1.06	1.65	1.2	2.3	3.35
Gh_A13G0665	0.8	2.03	2.5	1.56	0.69	0.69	1.56	1.2	2.7	2.5
Gh_A13G0768	2.47	1.45	4.36	1.58	0.06	0.12	1.18	0.99	0.69	1.74
Gh_D01G2009	0.24	0.12	0.16	0.22	0	0	0.18	0.1	0.04	0.17
Gh_D02G0129	0	0.23	0	0.025	0	0	0.16	0.16	0.03	0.05
Gh_D02G0135	0.77	1.24	1.22	0.66	0.11	0.075	2.36	2.82	1.99	0.78
Gh_D02G0240	1.86	1.16	1.82	1.63	1.56	1.09	1.57	1.46	2.89	1.37
Gh_D04G1061	0.68	0.89	0.73	1.02	0.39	0.17	2.19	2.57	0.67	0.73
Gh_D05G0051	0.15	0.25	0.32	0.41	0	0	0.1	0.08	0.33	0.29
Gh_D05G0556	3.75	3.8	2.92	2.45	0.47	0.73	2.12	1.9	2.96	2.21
Gh_D05G3688	2.12	1.77	4.24	2.38	0.53	0.27	1.73	1.95	1.56	1.37
Gh_D07G0345	0.97	1.39	1.55	1.42	0.34	0.042	0.92	0.54	0.73	1.23
Gh_D07G1658	0.57	0.75	1.18	0.92	0	0.05	1.09	0.566	0.71	1.4
Gh_D07G1662	0.3	0	0	0.48	0	0	0.31	0.25	0.3	0.4
Gh_D07G2103	1.02	0.95	1.24	1.25	0.6	0	0.57	0.39	0.99	0.71
Gh_D08G0677	1	0.79	1.69	1.12	0.09	0.12	1.67	1.18	1.15	0.97
Gh_D12G0454	2.5	1.7	3.1	2.7	0.14	0.32	1.4	0.71	1.9	1.3
Gh_D13G0901	0.09	0.41	0.44	0.13	0	0	0.2	0.19	0.025	0.28
Gh_Sca004802G02	0.65	0.65	0.86	0.45	0	0.16	1.71	2.3	1.15	0.5
Gh_A07G0290	0.73	1.07	0.56	0.72	0.16	0	0.42	0.23	0.59	0.61
Gh_A11G2033	0.55	0.67	0.42	0.54	0.1	0.07	0.35	0.26	0.85	0.71
Gh_D11G2312	0.13	0.59	0.55	0.3	0	0	0.195	0.19	0.55	0.37
Gh_D02G0472	6.21	16.5	4.02	2.71	6.83	2.7	2.78	3.6	4.9	4.2
Gh_A02G0419	2.03	3.81	3.45	2.8	0.43	0.22	2.18	1.61	2.42	2.19
Gh_A12G0594	0.09	0	0.45	0.1	0.13	0.05	0	0	0.25	0
Gh_Sca084155G01	0	0	0.33	0	0	0	0	0	0	0
Gh_D09G0024	1.31	1.23	3.57	2.79	0.74	0.1	1.45	1.08	1.44	0.8
Gh_A07G0989	0.24	0.16	0.72	0.24	0	0.06	0.26	0.24	0.29	0.55
Gh_D07G1067	0.16	0.03	0.49	0.21	0.09	0	0.41	0.36	0.22	0.51
Gh_A02G1199	0.3	1.21	1.09	1.01	0.05	0	0.3	0.1	0.24	0.85
Gh_D03G1703	0.22	0.32	0.69	0.65	0.14	0.065	0.3	0.2	0.18	0.55
Gh_A09G1303	0.41	0.46	0.58	0.74	0.84	5.84	0.59	0.22	0.11	0.61
Gh_A13G1155	0.51	0.63	0.92	0.42	0	0	0.65	0.27	0.55	0.69
Gh_D09G1309	0.46	0.63	0.58	0.32	0.56	0.38	0.69	0.45	0.44	0.24
Gh_D13G1441	0.53	0.71	0.59	0.63	0.04	0.085	0.65	0.85	0.94	0.95
Gh_A06G1873	0	0	0.07	0.02	0	0	0.023	0	0	0.16
Gh_D06G0241	0.11	0.08	0.07	0.05	0	0	0.03	0.088	0.21	0.78
Gh_A01G0144	0.64	1.01	1.31	0.65	0.3	0	0.45	0.49	0.099	0.26
Gh_A01G1420	0.33	0.67	0.71	0.43	0.11	0	1.3	0.2	0.15	0.38
Gh_A01G1752	0.78	1.39	2.12	2.42	0.64	0.032	1.05	0.66	0.305	0.56
Gh_A01G1807	1.67	0.74	2.12	1.66	0.72	0.21	1.2	0.96	1.72	0.93
Gh_A01G2040	0.71	1.28	1.16	0.73	0.25	0.15	0.933	0.54	0.662	0.86
Gh_A02G0074	1.04	0.95	1.29	1.57	0.097	0.13	1.36	0.59	1.05	1.61
Gh_A02G0212	3.05	6.72	3.9	3.68	0.91	0.39	4.7	3.06	3.45	7.05
Gh_A03G0377	4.82	6.32	6.78	5.1	1.36	0.77	3.15	1.13	3.23	3.29
Gh_A03G0587	0.33	1.04	0.95	0.91	0	0	0.22	0.32	1.01	0.33
Gh_A03G1665	2.58	2.11	1.91	2.28	1.72	1.32	0.93	0.96	1.45	0.75
Gh_A04G0834	2.28	1.43	1.6	1.22	0	0.18	0.64	1	1.5	2.16
Gh_A04G1432	1.03	1.43	0.91	1.21	0	0.26	1.31	0.72	0.76	0.98
Gh_A05G0567	1.03	1.93	1.07	1.76	1.71	1.83	0.66	0.74	0.98	0.71
Gh_A05G0745	1.15	1.82	1.48	0.62	0.5	0.08	0.84	0.22	0.39	0.75
Gh_A05G2917	0.41	0.66	0.67	0.38	0.49	0	1.13	0.33	0.62	0.48
Gh_A05G3440	0.08	0.11	0.72	0.28	0	0	0.35	0.19	0	0.23
Gh_A05G3966	0.18	0.74	0.42	0.84	0.05	0.08	0.44	0.26	0.28	0.53
Gh_A06G0569	0.44	0.77	0.45	0.2	0.46	0.09	1.67	1.24	0.31	0.23
Gh_A06G1003	0.95	2.01	1.81	1.82	0.14	0.19	1.27	0.26	0.6	0.75
Gh_A06G1120	0.69	0.74	1.24	1.06	0.48	0.32	0.43	0.465	0.92	0.51
Gh_A06G1533	0.8	0.97	1.22	0.84	0	0.01	0.88	0.75	0.77	0.87
Gh_A07G0183	0.39	0.5	0.28	0.66	0.23	0.72	0.55	0.33	0.26	0.27
Gh_A07G0992	0.43	0.48	0.38	0.98	0	0	3.23	3.05	0.36	0.86
Gh_A07G1662	0.62	1.034	0.56	0.49	0.27	0	0.69	0.25	0.63	0.38
Gh_A07G2143	0.37	0.64	0.75	0.48	0.096	0	0.23	0.05	0.51	0.46
Gh_A08G1382	1.75	0.18	1.38	0.77	0.16	0.1	0.03	0.02	0.16	0.78
Gh_A08G1494	1.18	1.15	1.51	1.17	1.4	0.24	1	0.49	0.67	0.78
Gh_A08G1810	0.78	0.99	1.48	2	0.34	0.18	0.83	1	0.43	0.79
Gh_A08G1996	0.76	0.64	1.09	1.06	0.42	0	0.52	0.33	0.67	0.35
Gh_A09G0759	0.033	0	0.22	0.061	0	0	0.012	0.1	0.03	0.06
Gh_A09G1156	0.75	1.04	0.68	0.65	0.33	0.055	0.63	0.98	0.73	0.53
Gh_A09G1172	0.45	0.69	0.57	0.32	0.07	0.1	0.21	0.16	0.11	0.71
Gh_A09G1638	0.057	0.09	0.57	0.32	0.14	0.041	0.09	0.04	0.31	0.19
Gh_A09G2140	2.07	9.89	4.56	2.67	0.75	0.3	1.77	0.8	1.56	2.35
Gh_A09G2143	0.22	0	0.38	0.12	0.1	0	0.095	0.17	0.11	0.17
Gh_A10G1047	0.65	0.68	1.22	0.99	0.23	0.31	0.73	0.9	0.68	0.69
Gh_A11G0575	0.33	0.26	0.24	0.53	0.13	0.09	0.42	0.18	0.27	0.43
Gh_A11G0632	0.33	0.39	0.26	0.35	0.064	0	0.25	0.22	0.32	0.38
Gh_A11G0779	0.33	0.56	0.59	0.98	0.22	0.18	0.25	0.17	0.13	0.24
Gh_A11G1224	0.93	0.64	1.16	2.12	0.14	0.04	0.9	0.81	1.05	0.65
Gh_A11G1329	0.34	1.13	0.42	0.52	0.065	0.19	0.62	0.46	0.66	0.58
Gh_A11G1384	0.59	0.84	0.5	0.46	0.05	0	0.22	0.029	0.11	0.3
Gh_A11G2278	0.1	0.14	0.25	0.02	0	0	0.12	0.05	0.27	0
Gh_A11G2342	0.38	0.53	0.37	0.19	0	0.13	0.56	0.53	0.31	0.42
Gh_A11G2657	1.36	1.1	1.12	1.19	0.11	0.03	2.6	2.11	1.24	0.65
Gh_A11G2821	0.25	0.35	0.12	0.025	0	0	0.11	0	0.26	0.11
Gh_A11G3080	0.9	0.57	0.76	1.05	0.38	0.043	0.65	0.35	0.76	0.33
Gh_A12G0429	0.411	0.36	0.92	0.79	0.31	0	0.44	0.39	0.44	0.7
Gh_A12G0458	0.46	1.31	0.56	0.76	0	0.13	0.17	0.22	0.18	0.57
Gh_A12G0486	0.36	0.75	0.22	0.42	0.05	0.075	0.31	0.42	0.42	0.24
Gh_A12G0640	0.34	0.45	0.31	0.99	0.14	0.045	0.17	0.13	0.03	0.27
Gh_A12G0724	0.08	0.62	0.42	0.68	0	0.12	0.45	0.42	0.27	0.38
Gh_A12G0837	1.02	0.23	0.28	0.13	0.35	0.08	0.17	0.015	0.23	0.36
Gh_A12G1295	0.23	0.44	0.28	0.87	0	0	0.39	0.16	0.15	0.24
Gh_A12G1713	2.4	4.6	3.27	2.06	2.38	1.6	1.24	1.36	3.5	4.6
Gh_A12G2273	0.74	1.52	1.18	1	0.506	0.07	0.58	0.25	0.38	0.65
Gh_A12G2587	0	0	0.04	0	0	0	0	0	0	0
Gh_A12G2727	0.23	0.32	0.99	0.94	0.12	0.04	0.66	0.29	0.25	0.61
Gh_A13G0347	7.64	13.9	8.24	7.73	1.78	0.76	6.3	6.8	6.3	4.2
Gh_A13G0941	0.059	0.62	0.21	0.56	0	0.18	0.39	0.018	0.09	0.36
Gh_A13G1039	1.13	3.35	0.8	0.95	0.17	0.46	1.53	0.8	1.96	1.58
Gh_A13G1386	0.74	1.19	1.8	1.17	0.11	0.15	1.22	0.9	0.59	1.28
Gh_A13G1722	2.74	3.82	5.66	2.85	2	0.4	2.86	2.82	2.12	2.28
Gh_D01G0153	0.82	0.85	1.31	0.89	0.49	0.082	0.839	0.64	1.68	0.73
Gh_D01G0189	0.78	0.7	1.06	1.53	0	0.11	0.95	0.49	0.69	0.35
Gh_D01G1658	0.57	0.67	0.82	0.47	0	0	0.88	0.78	0.59	0.67
Gh_D01G2046	0.89	1.89	2.45	1.94	0.62	0.31	0.75	0.27	0.65	1.07
Gh_D02G0089	0.82	0.76	0.81	1.12	0.22	0.03	0.71	0.28	0.65	1.3
Gh_D02G2080	2.57	2.37	2.07	2.83	1.89	1.71	0.59	0.63	1.31	0.75
Gh_D03G0871	0.74	0.85	1.18	0.59	0	0	0.56	0.44	0.59	0.64
Gh_D03G1165	3.27	4.02	6.63	4.08	0.25	0.43	2.5	1.8	4.1	2.7
Gh_D04G0152	0.31	0.79	0.19	0.32	0	0.06	0.51	0.13	0.21	0.31
Gh_D04G0703	0.41	0.33	0.58	0.56	0.14	0	0.91	0.65	0.15	0.685
Gh_D04G1333	0.75	0.71	1.44	1.07	0.36	0.21	1.29	0.55	0.46	0.99
Gh_D04G1483	0.51	1.35	1.13	1.05	0.25	0.087	0.97	0.64	0.34	0.64
Gh_D05G0078	0.63	0.84	0.48	0.4	0.12	0.078	0.51	0.211	0.33	0.58
Gh_D05G0696	0.72	1.65	1.05	1.64	0.74	0.15	0.85	0.68	1.22	0.73
Gh_D05G0877	0.73	1.07	0.77	0.62	0.13	0.04	0.73	0.77	0.31	0.58
Gh_D05G0911	0.63	0.68	0.63	0.46	0.12	0	0.51	0.29	1.09	0.79
Gh_D06G0644	0.54	0.075	0.48	0.35	0.13	0.088	0.43	0.577	0.76	0.35
Gh_D06G1374	0.63	0.95	1.51	0.8	0.38	0.046	1.18	1.17	1.35	0.56
Gh_D06G1902	0.77	1.43	2.1	2.24	0.11	0.08	1.37	1.12	0.78	1.37
Gh_D07G0238	0.44	0.56	1.22	0.93	0.055	0	0.54	0.66	0.17	0.73
Gh_D07G1070	0.6	0	0.3	0.52	1	0	1.2	0.25	0.63	0.48
Gh_D07G1876	0.44	1.16	0.64	0.82	0	0.091	0.48	0.45	0.4	0.25
Gh_D07G2355	0.37	0.66	0.53	0.46	0.22	0	0.43	0.17	0.29	1.04
Gh_D08G0337	1.11	1.45	1.88	1.73	0.27	0.19	1.49	1.54	1.37	1.05
Gh_D08G1677	2.61	0.102	1.47	0.89	0	0.28	0.22	0.04	0	0.79
Gh_D08G1792	0.95	1.21	1.83	0.94	0.35	0.24	0.57	0.5	0.43	0.61
Gh_D08G2007	1.13	1.55	0	0.45	0	0.79	0.38	0	0.25	1.15
Gh_D08G2170	1.04	0.87	0.933	1.18	0	0.089	0.64	0.44	0.99	0.33
Gh_D08G2381	0.65	1.05	0.82	0.7	0.53	0.15	0.26	0.2	0.42	0.4
Gh_D08G2390	0.57	0.97	0.45	0.46	0.49	0.22	0.73	0.2	0.32	0.38
Gh_D09G0761	0.39	0.66	0.67	0.5	0	0.084	0.28	0.39	0.65	0.57
Gh_D09G1162	1.09	0.85	1.19	0.99	0.49	0.22	1.06	1.18	0.57	0.93
Gh_D09G1178	0.74	0.65	0.76	0.87	0.42	0.39	0.59	0.25	0.77	1.84
Gh_D09G1732	0.17	0.27	0.33	0.14	0	0	0.1	0.17	0.08	0.1
Gh_D09G2129	1.13	0.69	1.59	0.62	0	0	0.75	0.55	0.22	1.14
Gh_D09G2346	3.4	4.8	5.1	2.57	0.3	0.2	2.19	1.91	2.33	1.76
Gh_D09G2348	0.25	0.68	0.41	0.33	0.15	0	0.26	0.41	0.07	0.08
Gh_D10G1472	1.26	1.5	1.09	1.52	1.74	0.03	0.71	1.1	0.75	0.81
Gh_D11G0742	0.31	0.69	0.62	0.5	0.055	0.03	0.27	0.13	0.17	0.22
Gh_D11G0908	0.28	1.18	0.59	0.51	0.23	0	0.21	0.045	0.2	0.32
Gh_D11G1371	0.99	0.55	0.51	1.07	0	0.33	0.75	0.32	0.53	0.56
Gh_D11G1398	0.54	0.34	0.96	0.43	0.5	0.1	0.45	0.15	0.57	0.46
Gh_D11G1480	0.61	0.4	0.8	0.58	0.07	0.044	0.45	0.25	0.27	0.8
Gh_D11G1526	0.32	0.36	0.025	0.57	0.18	0.07	0.05	0.027	0.25	0.18
Gh_D11G2584	0.2	0.03	0.72	0.27	0	0.07	0.55	0	0.05	0.31
Gh_D11G2656	0.18	0.49	0.28	0.49	0	0.11	0.17	0.31	0.58	0.32
Gh_D11G3019	1.02	1.29	0.99	1.19	0.19	0.038	2.06	2.8	1.4	0.95
Gh_D11G3176	0.2	0.26	0.44	0.25	0	0	0.24	0.04	0.26	0.19
Gh_D12G0250	1.13	0.36	1.14	1.19	0.41	0.41	0.65	0.6	1.11	0.76
Gh_D12G0425	0.27	0.1	0.18	0	0.075	0.1	0.01	0.02	0	0.04
Gh_D12G0461	0.58	1.45	1.52	1.28	0.14	0.06	0.13	0.16	0.35	0.66
Gh_D12G0494	0.26	0.56	0.46	0.43	0.16	0.08	0.16	0.33	0.79	0.33
Gh_D12G0688	0.92	2.1	2.1	2.36	0.06	0.13	0.95	0.54	0.556	0.93
Gh_D12G0748	0.31	0.27	0.4	0.77	0	0.038	0.63	0.24	0.62	0.35
Gh_D12G0860	0.95	1.1	1.02	0.67	0.12	0.49	0.9	0.62	0.57	0.9
Gh_D12G0901	0.23	0.2	0.35	0.44	0.21	0	0.26	0.14	0.32	0.07
Gh_D12G1417	0.18	0.29	0.33	0.55	0	0.07	0.48	0.25	0.46	0.14
Gh_D12G1874	3.5	4.5	4.28	2.9	0.67	0.7	1.34	2.1	3.05	4.8
Gh_D12G1918	2.2	1.63	2.2	1.42	0.65	0.12	3.3	1.8	2.95	2.44
Gh_D12G2546	0.33	0.65	0.31	0.63	0.24	0	0.41	0.13	0.1	0.25
Gh_D13G0390	6.6	9.6	8.6	8.5	2.4	1.15	5.8	5	4.3	3.7
Gh_D13G1193	0.39	0.18	0.42	0.67	0	0.04	0.26	0.25	0.12	0.33
Gh_D13G1291	1.19	4.1	2	1.28	0.36	0.39	1.53	0.99	2.52	2.15
Gh_D13G1697	0.36	0.98	0.59	0.95	0.22	0	0.82	0.8	0.67	0.99
Gh_D13G2070	3.98	4.6	6.96	5.16	1.56	0.84	2	1.82	1.83	1.72
Gh_Sca010496G01	0.12	0	0	0.02	0	0	0.04	0.018	0.039	0.013
Gh_A12G2290	0.7	0.95	0.73	0.74	0.85	0.62	0.2	0.18	0.91	0.48
Gh_D12G2427	0	0	0	0	0	0	0.0078	0	0	0.06
Gh_A10G0329	0.69	0.55	0.98	0.42	0	0	0.11	0.15	0.51	0.45
Gh_D10G0335	0.69	0.48	1.22	0.86	0.045	0.12	0.39	0.22	0.73	0.69
Gh_A09G0026	1.35	1.68	2.88	3.05	0.12	0.17	1.73	0.72	1.05	0.88
Gh_A10G0617	0.095	0	0.13	0.14	0	0	0.15	0.055	0	0.06
Gh_D10G0783	0.37	0.62	0.49	0.71	0	0	0.2	0.06	0.12	0.54
Gh_A02G1606	3.07	1.89	2.43	4.14	1.56	0.86	3.15	2.41	2.5	1.76
Gh_D01G0242	0.97	1.93	1.35	1.4	0.122	0.17	0.89	0.54	0.65	0.404
Gh_D03G0117	1.94	1.77	1.47	2.9	1.14	0.86	2.22	2.5	2.18	2.02
Gh_A04G0046	2.22	1.94	2.7	2.63	0.26	0.102	1.2	0.77	0.88	1.1
Gh_A01G0876	2.11	1.51	1.91	0.88	1.17	0.7	1.08	0.84	2.14	3.2
Gh_A01G1103	0.35	0.63	0.38	0.83	0.12	0.082	0.749	0.46	0.278	0.252
Gh_A01G1674	0.25	0.75	0.34	0.86	0	0	1.3	0.46	1.43	0.44
Gh_A02G0889	0.4	0	0	0.35	0	0.14	0.065	0.45	0	0
Gh_A03G0850	0.65	0.37	0.99	0.87	0.29	0.13	0.26	0.06	0.05	0.3
Gh_A03G1304	1	1.15	0.79	1.02	0.13	0	0.94	0.23	0.53	0.73
Gh_A05G1630	7.35	7.6	9	2.24	4.25	5.34	0.56	0.75	3.7	1.9
Gh_A05G3969	1.22	0.66	1.61	0.35	0.82	1.6	1.1	1.1	0.45	0.4
Gh_A06G1611	0.1	0.17	0.25	0.047	0.072	0	0.027	0	0.11	0.04
Gh_A07G1125	0.26	0.14	0.33	0.08	0.11	0	0.3	0.12	0.44	0.54
Gh_A08G0582	0.24	0.23	0.33	0.33	0	0	0.46	0.19	0.34	0.4
Gh_A08G1988	0.49	0.59	1.17	0.34	0.34	0.05	0.23	0.14	0.87	0.39
Gh_A09G1921	0.7	0.66	1.08	0.69	0.23	0	0.46	0.42	0.69	0.59
Gh_A10G1770	1.83	1.46	1.57	0.95	0.3	0.09	1.49	1.35	0.95	1.03
Gh_A12G0524	0.3	0.34	0.25	0.8	0	0	0.21	0.08	0.4	0.29
Gh_A12G2221	2.39	2.08	6.79	3.02	0	0.24	3.7	1.04	1.65	3.3
Gh_D01G0912	0.76	0.82	0.68	0.73	0.056	0.043	0.85	0.229	0.75	0.57
Gh_D01G1178	0.4	0.27	0.5	0.45	0	0.15	0.43	0.19	0.46	0.06
Gh_D01G1996	1.35	1.16	2.17	2.09	0.34	0.37	1.35	0.7	0.31	1.01
Gh_D02G1164	0.72	0.38	0.65	0.78	0.2	0.96	0.67	0.57	0.67	0.41
Gh_D02G1741	1.21	1.06	1.61	0.62	0.23	0.04	1.4	0.4	0.6	0.46
Gh_D02G2396	0.56	0.44	0.77	0.8	0.11	0.15	0.79	0.99	0.83	0.71
Gh_D04G1554	8.17	9.65	8.85	7.15	1.3	1.1	20.3	21.11	9.27	9.3
Gh_D05G1812	11.15	9.2	11.03	1.3	2.1	2.31	0.72	0.67	2.96	1.96
Gh_D06G1981	0.09	0.08	0	0.17	0.19	0	0.1	0.05	0.14	0.36
Gh_D07G2446	0.23	0.58	0.31	0.48	0.093	0	0.59	0.09	0.18	0.69
Gh_D10G2042	2.63	2.03	1.82	1.93	0.58	0.11	0.85	0.66	1.5	1.9
Gh_D12G0538	0.03	0	0.035	0.1	0	0	0.01	0.02	0.15	0.16
Gh_D12G2423	0.46	0.63	1.1	0.96	0.2	0.035	0.31	0.1	0.15	0.37
Gh_D12G2728	2.41	1.71	3.7	3.71	0.11	0.44	3.7	2.08	2.5	2.67
Gh_D13G0780	0.81	0.58	1.42	0.88	0.17	0.11	0.79	0.61	1	1.78
Gh_A07G2185	0.54	0	0.34	0	0	0	0	0	0	0
