# Supplementary material for: A genome-wide identification and analysis of the DYW-deaminase genes in the pentatricopeptide repeat gene family in cotton (Gossypium spp.)
Source: PLoS One. 2017 Mar 24;12(3):e0174201. doi: 10.1371/journal.pone.0174201 (PMC5365158; doi:10.1371/journal.pone.0174201)
Supplement: S2 Table — (XLSX) [file pone.0174201.s006.xlsx]

## Sheet: Gene family
Gene ID	Chromosome location	Start	End	Length(aa)	intron number	Subcellular location
Gorai.001G029200.1	chr_1	2743698	2745776	692	0	M	_:	None
Gorai.001G040600.1	chr_1	3760732	3762516	709	1	C	C:	Chloroplast
Gorai.001G121000.1	chr_1	14730346	14733276	976	0	C	M:	Mitochondrion
Gorai.001G121300.1	chr_1	14807577	14808740	824	2	C	S:	Signal peptide
Gorai.001G138400.1	chr_1	18322394	18324961	855	0	_
Gorai.001G155500.1	chr_1	21828748	21830074	1172	2	C
Gorai.001G191900.1	chr_1	32239586	32241634	682	0	_
Gorai.001G214700.1	chr_1	42938824	42941082	685	0	_
Gorai.001G240800.1	chr_1	48065158	48067044	628	0	M
Gorai.001G275900.1	chr_1	55334976	55337432	818	0	C
Gorai.002G016600.1	chr_2	1085989	1088433	752	0	C
Gorai.002G020900.1	chr_2	1437593	1439269	558	0	M
Gorai.002G032400.1	chr_2	2424280	2424631	658	0	S
Gorai.002G057400.1	chr_2	6052196	6055580	882	0	C
Gorai.002G120300.1	chr_2	17282507	17284651	714	0	_
Gorai.002G120600.1	chr_2	17307183	17307240	422	3	S
Gorai.002G151700.1	chr_2	30392683	30394947	754	1	_
Gorai.002G151700.2	chr_2	30392683	30393202	657	2	_
Gorai.002G200700.1	chr_2	54082749	54085160	803	0	C
Gorai.002G238700.1	chr_2	60225672	60227630	652	0	_
Gorai.002G240300.1	chr_2	60351166	60353253	695	0	M
Gorai.002G244700.1	chr_2	60878611	60881268	885	0	C
Gorai.003G012700.1	chr_3	817229	819813	658	0	C
Gorai.003G097100.1	chr_3	30117340	30120027	642	0	_
Gorai.003G128500.1	chr_3	38011340	38013717	651	0	C
Gorai.004G038400.1	chr_4	3214226	3216025	599	0	_
Gorai.004G076500.1	chr_4	8786638	8789544	968	0	S
Gorai.004G181600.1	chr_4	49308692	49308792	605	0	_
Gorai.004G194300.1	chr_4	51285307	51287370	687	0	M
Gorai.004G235300.1	chr_4	57335296	57335515	703	0	M
Gorai.004G262700.1	chr_4	59798784	59798935	761	1	M
Gorai.005G009200.1	chr_5	639043	641844	933	0	C
Gorai.005G014400.1	chr_5	1050385	1050493	727	0	M
Gorai.005G026900.1	chr_5	2369806	2369932	610	0	M
Gorai.005G031300.1	chr_5	2789969	2790405	702	1	C
Gorai.005G053800.1	chr_5	5329795	5329963	577	0	_
Gorai.005G119200.1	chr_5	24635374	24635499	830	0	S
Gorai.005G136900.1	chr_5	35426885	35429296	803	0	C
Gorai.005G192500.1	chr_5	56185286	56185370	692	0	_
Gorai.005G192500.2	chr_5	56185425	56187938	692	0	_
Gorai.005G237500.1	chr_5	61905789	61905910	816	0	M
Gorai.006G003200.1	chr_6	717749	719725	658	0	_
Gorai.006G094600.1	chr_6	33230537	33232965	707	0	M
Gorai.006G137700.1	chr_6	39396303	39397244	579	1	_
Gorai.006G139500.1	chr_6	39656248	39656833	646	1	M
Gorai.006G139600.1	chr_6	39670156	39670651	624	2	M
Gorai.006G154800.1	chr_6	41321854	41324179	665	1	M
Gorai.006G199900.1	chr_6	45694326	45696519	675	0	M
Gorai.006G243300.1	chr_6	48912656	48914271	529	0	_
Gorai.006G266600.1	chr_6	50519028	50521090	630	0	C
Gorai.006G267000.1	chr_6	50537304	50539340	638	0	S
Gorai.007G071200.1	chr_7	5008883	5010970	695	0	_
Gorai.007G079800.1	chr_7	5653746	5656220	703	0	M
Gorai.007G079800.2	chr_7	5653309	5653649	703	0	M
Gorai.007G096200.1	chr_7	7083723	7086152	809	0	S
Gorai.007G149300.1	chr_7	12641284	12643514	666	0	M
Gorai.007G152300.1	chr_7	13030457	13032795	644	0	C
Gorai.007G160800.1	chr_7	14077585	14077878	638	0	C
Gorai.007G166400.1	chr_7	14704149	14707154	851	0	_
Gorai.007G249300.1	chr_7	39164076	39166793	892	0	_
Gorai.007G280600.1	chr_7	48031968	48034376	773	0	_
Gorai.007G288400.1	chr_7	49474038	49474311	1082	1	C
Gorai.007G344400.1	chr_7	57278884	57278936	815	0	C
Gorai.007G363000.1	chr_7	59454918	59457043	624	0	_
Gorai.008G028200.1	chr_8	3326094	3327918	656	1	_
Gorai.008G048000.1	chr_8	6630353	6632173	606	0	C
Gorai.008G050500.1	chr_8	7103372	7103536	683	0	M
Gorai.008G050500.2	chr_8	7103372	7103398	683	0	M
Gorai.008G050500.3	chr_8	7099866	7103536	683	0	M
Gorai.008G051300.1	chr_8	7178401	7181257	865	0	C
Gorai.008G055100.1	chr_8	8091343	8091686	732	0	_
Gorai.008G059500.1	chr_8	9369491	9372278	867	0	C
Gorai.008G067300.1	chr_8	10949785	10952100	622	0	_
Gorai.008G073100.1	chr_8	12751235	12753901	684	0	C
Gorai.008G079500.1	chr_8	15378891	15380789	632	0	C
Gorai.008G086300.1	chr_8	18829975	18832131	718	0	_
Gorai.008G102200.1	chr_8	30534515	30537205	782	0	_
Gorai.008G156300.1	chr_8	41712822	41715493	833	0	M
Gorai.008G205900.1	chr_8	49082011	49084119	702	0	C
Gorai.008G205900.2	chr_8	49084153	49084347	548	0	_
Gorai.008G210900.1	chr_8	49706194	49706328	539	1	_
Gorai.008G210900.2	chr_8	49706194	49709001	539	1	_
Gorai.008G264200.1	chr_8	54389550	54390046	721	1	C
Gorai.008G269700.1	chr_8	54855712	54858647	859	0	C
Gorai.008G273500.1	chr_8	55222117	55224958	881	0	_
Gorai.008G289000.1	chr_8	56396198	56397700	769	1	M
Gorai.009G006800.1	chr_9	577829	577831	626	0	M
Gorai.009G009600.1	chr_9	777949	780863	788	0	_
Gorai.009G057300.1	chr_9	4132129	4134333	610	0	_
Gorai.009G072800.1	chr_9	5192672	5195061	744	0	M
Gorai.009G092600.1	chr_9	6774493	6776694	733	0	_
Gorai.009G097000.1	chr_9	7041707	7044543	754	0	S
Gorai.009G198200.1	chr_9	15324897	15327469	1512	7	_
Gorai.009G198200.2	chr_9	15324897	15327469	1244	5	_
Gorai.009G198200.3	chr_9	15324742	15327682	890	0	_
Gorai.009G414200.1	chr_9	63329276	63332422	719	0	_
Gorai.009G451200.1	chr_9	70186072	70188239	616	0	C
Gorai.010G001600.1	chr_10	62731	62756	758	0	_
Gorai.010G032300.1	chr_10	2872042	2872134	757	1	C
Gorai.010G032300.2	chr_10	2872047	2872254	654	0	_
Gorai.010G075400.1	chr_10	10765152	10767529	695	0	M
Gorai.010G075400.2	chr_10	10766786	10767529	608	1	M
Gorai.010G153300.1	chr_10	41940917	41943070	592	0	C
Gorai.010G158200.1	chr_10	44483095	44483168	564	7	_
Gorai.010G214600.1	chr_10	58140848	58141294	635	1	C
Gorai.010G224300.1	chr_10	59672554	59674521	655	0	_
Gorai.011G038100.1	chr_11	2858338	2858676	875	0	C
Gorai.011G088900.1	chr_11	9312769	9314480	835	1	M
Gorai.011G165700.1	chr_11	32688821	32691343	840	0	C
Gorai.011G229900.1	chr_11	54368145	54368240	1052	8	_
Gorai.011G229900.2	chr_11	54368145	54368240	921	5	_
Gorai.011G229900.3	chr_11	54369634	54369751	922	3	_
Gorai.012G021300.1	chr_12	2617671	2617861	970	0	C
Gorai.012G082800.1	chr_12	13713753	13714262	659	1	C
Gorai.012G121600.1	chr_12	27706879	27708714	611	0	C
Gorai.012G138600.1	chr_12	31244547	31246478	643	0	C
Gorai.012G146600.1	chr_12	32081995	32082288	680	0	M
Gorai.013G043300.1	chr_13	3772348	3772689	585	0	M
Gorai.013G086000.1	chr_13	12823686	12824304	516	1	C
Gorai.013G086000.2	chr_13	12823686	12824304	414	0	_
Gorai.013G098500.1	chr_13	17503457	17505688	743	0	C
Gorai.013G131400.1	chr_13	34354786	34355276	661	1	_
Gorai.013G142700.1	chr_13	38940091	38940398	937	0	M
Gorai.013G158100.1	chr_13	43381039	43381149	944	0	M
Gorai.013G198600.1	chr_13	50775093	50777255	720	0	_
Gorai.013G228400.1	chr_13	54763157	54763341	487	0	C
Cotton_A_01590	chr_1	135399634	135402315	618	0	C
Cotton_A_05942	chr_1	140406032	140407915	628	0	M
Cotton_A_09575	chr_1	105430260	105433190	976	0	C
Cotton_A_09578	chr_1	105535487	105538108	873	0	C
Cotton_A_22715	chr_1	98981055	98983977	852	0	C
Cotton_A_28020	chr_1	13065492	13067702	736	0	C
Cotton_A_30003	chr_1	92492222	92494663	813	1	_
Cotton_A_34312	chr_1	35444291	35447113	940	1	M
Cotton_A_39243	chr_1	23528798	23530846	682	4	_
Cotton_A_03411	chr_2	26046947	26048782	611	0	C
Cotton_A_15955	chr_2	8467276	8469624	782	0	_
Cotton_A_16255	chr_2	17153776	17156142	788	0	_
Cotton_A_17617	chr_2	45738388	45740187	599	0	_
Cotton_A_18227	chr_2	104976001	104978277	758	0	_
Cotton_A_20263	chr_2	67310052	67319345	991	0	C
Cotton_A_25415	chr_2	34016102	34018261	719	0	_
Cotton_A_28264	chr_2	129834814	129836562	582	0	_
Cotton_A_30825	chr_2	143155526	143157615	659	1	C
Cotton_A_37726	chr_2	94941784	94944051	755	3	_
Cotton_A_01069	chr_3	34201271	34203502	743	0	M
Cotton_A_01226	chr_3	33032908	33034740	610	0	M
Cotton_A_03702	chr_3	52931272	52940128	2191	0	C
Cotton_A_03759	chr_3	52009092	52011008	638	0	C
Cotton_A_06599	chr_3	79984669	79986282	537	0	_
Cotton_A_09458	chr_3	54678559	54680091	510	0	S
Cotton_A_15028	chr_3	111214898	111218221	1061	0	C
Cotton_A_15473	chr_3	57233389	57235239	616	0	S
Cotton_A_28368	chr_3	10895993	10898314	773	1	C
Cotton_A_32339	chr_3	137390122	137392368	748	1	_
Cotton_A_36351	chr_3	36484574	36487252	892	1	_
Cotton_A_37555	chr_3	131240412	131242532	706	2	_
Cotton_A_00058	chr_4	37680058	37681734	558	0	M
Cotton_A_00096	chr_4	38103942	38106197	751	0	C
Cotton_A_27764	chr_4	34692380	34694335	651	0	C
Cotton_A_28557	chr_4	59427828	59429975	715	1	_
Cotton_A_15541	chr_5	90157167	90164019	1053	0	M
Cotton_A_22374	chr_5	118105330	118107492	720	0	_
Cotton_A_23272	chr_5	53544388	53546514	708	0	_
Cotton_A_24301	chr_5	89085938	89088049	703	0	M
Cotton_A_30439	chr_5	34963147	34965960	937	1	M
Cotton_A_33828	chr_5	121251092	121253056	654	1	M
Cotton_A_06956	chr_6	88863536	88865744	702	0	_
Cotton_A_16485	chr_6	5336869	5338551	560	0	S
Cotton_A_05775	chr_7	40576161	40577378	405	0	S
Cotton_A_05786	chr_7	40497157	40499523	788	0	M
Cotton_A_09744	chr_7	36003284	36004798	504	0	_
Cotton_A_25990	chr_7	97859777	97862372	761	0	_
Cotton_A_25992	chr_7	97872477	97875072	761	0	_
Cotton_A_26302	chr_7	31262263	31263972	569	0	_
Cotton_A_39671	chr_7	102432403	102432849	148	4	_
Cotton_A_02968	chr_8	72941393	72943327	644	0	C
Cotton_A_02993	chr_8	72511224	72513224	666	0	M
Cotton_A_07464	chr_8	48669386	48671236	616	0	C
Cotton_A_07524	chr_8	49948086	49950692	868	0	M
Cotton_A_10449	chr_8	69978211	69979722	503	0	_
Cotton_A_12931	chr_8	66103927	66106128	733	0	_
Cotton_A_17392	chr_8	30545312	30547718	712	0	C
Cotton_A_17523	chr_8	89978044	89980671	875	0	C
Cotton_A_34976	chr_8	90384314	90387058	777	1	C
Cotton_A_01429	chr_9	120089227	120091890	763	0	M
Cotton_A_04493	chr_9	106152492	106154993	833	0	M
Cotton_A_07988	chr_9	115806564	115808459	471	0	M
Cotton_A_08048	chr_9	114789234	114791342	702	0	C
Cotton_A_11411	chr_9	78053323	78055722	799	0	S
Cotton_A_17704	chr_9	27991238	27992812	524	0	_
Cotton_A_17735	chr_9	21713167	21715746	859	0	C
Cotton_A_17776	chr_9	21328715	21331360	881	0	_
Cotton_A_21338	chr_9	93987434	93989632	702	0	_
Cotton_A_27301	chr_9	95009538	95010791	417	0	S
Cotton_A_32575	chr_9	60276263	60278419	718	1	_
Cotton_A_36910	chr_9	63103533	63105431	632	2	C
Cotton_A_37812	chr_9	168696	171140	814	3	C
Cotton_A_07793	chr_10	73662445	73664783	646	0	M
Cotton_A_07815	chr_10	73349714	73351663	579	0	_
Cotton_A_09637	chr_10	32798861	32800753	630	0	C
Cotton_A_13417	chr_10	75695931	75697679	582	0	M
Cotton_A_20564	chr_10	49522401	49524380	659	0	_
Cotton_A_23710	chr_10	71300931	71302902	261	0	_
Cotton_A_23711	chr_10	71355369	71357255	628	0	_
Cotton_A_34884	chr_10	37403979	37406385	757	1	C
Cotton_A_16896	chr_11	105330652	105333858	754	0	M
Cotton_A_18858	chr_11	3894798	3896744	648	0	_
Cotton_A_29248	chr_11	55309712	55311601	629	1	_
Cotton_A_30897	chr_11	38175386	38177464	692	1	_
Cotton_A_32227	chr_11	110513554	110515989	811	1	C
Cotton_A_38340	chr_11	10534895	10536616	573	3	_
Cotton_A_00501	chr_12	68513273	68515930	885	0	C
Cotton_A_10175	chr_12	66341459	66342970	503	0	_
Cotton_A_21752	chr_12	33836752	33839163	803	0	C
Cotton_A_00793	chr_13	7325121	7326572	483	0	_
Cotton_A_04367	chr_13	25790063	25792867	934	0	C
Cotton_A_04407	chr_13	25390647	25392713	411	0	S
Cotton_A_04410	chr_13	25373840	25376023	727	0	M
Cotton_A_22853	chr_13	43060484	43062217	577	0	_
Cotton_A_27094	chr_13	58389523	58391660	686	0	C
Cotton_A_35950	chr_13	34344337	34346533	544	1	_
Cotton_A_36721	chr_13	28228459	28232526	988	1	_
Gh_A01G0144	A01	1344818	1346494	558	0	M
Gh_A01G0244	A01	2360196	2362172	658	0	S
Gh_A01G0876	A01	20627513	20629660	715	0	_
Gh_A01G1103	A01	42352854	42355121	755	0	_
Gh_A01G1420	A01	88619805	88622216	803	0	C
Gh_A01G1674	A01	95313665	95313989	217	1	S
Gh_A01G1752	A01	96920698	96922575	1647	24	_
Gh_A01G1766	A01	97052101	97054182	693	0	_
Gh_A01G1807	A01	97861289	97863952	887	0	C
Gh_A02G0074	A02	600079	602880	751	0	C
Gh_A02G0176	A02	1989653	1991485	933	0	C
Gh_A02G0212	A02	2401172	2402004	610	0	M
Gh_A02G0419	A02	5392529	5394262	702	1	C
Gh_A02G0889	A02	30679245	30680006	577	0	_
Gh_A02G1199	A02	68292510	68295158	253	0	_
Gh_A02G1606	A02	82561039	82563015	882	0	C
Gh_A03G0377	A03	7186504	7188459	658	0	C
Gh_A03G0587	A03	15508230	15510158	651	0	C
Gh_A03G0850	A03	47274909	47277353	642	0	_
Gh_A03G1304	A03	90794475	90796553	814	0	C
Gh_A03G1665	A03	97812754	97815225	692	0	M
Gh_A04G0046	A04	500158	502008	823	0	M
Gh_A04G0600	A04	40894736	40896895	616	0	_
Gh_A04G0834	A04	54347088	54348923	719	0	_
Gh_A04G1004	A04	59983091	59985133	611	0	C
Gh_A05G0567	A05	6070817	6073051	680	0	M
Gh_A05G0745	A05	7721246	7723447	643	0	C
Gh_A05G1630	A05	16860196	16860492	744	0	M
Gh_A05G2917	A05	70614446	70615489	733	0	_
Gh_A05G3440	A05	89474176	89477088	1542	0	_
Gh_A06G0016	A06	73728	76004	659	0	C
Gh_A06G0569	A06	14729223	14731310	970	0	C
Gh_A06G1003	A06	48668402	48670123	788	0	_
Gh_A06G1120	A06	70697453	70699231	944	0	_
Gh_A06G1533	A06	99256032	99257607	758	0	_
Gh_A06G1611	A06	101057453	101059417	695	0	M
Gh_A07G0183	A07	2315599	2317677	573	0	_
Gh_A07G0290	A07	3541692	3543476	592	0	C
Gh_A07G0989	A07	18781132	18784062	635	1	C
Gh_A07G0992	A07	18886204	18888822	654	0	_
Gh_A07G1125	A07	23792155	23794722	757	1	C
Gh_A07G1269	A07	29398938	29400828	692	0	M
Gh_A07G1662	A07	67194727	67196784	594	0	_
Gh_A07G1888	A07	74307539	74309425	976	0	C
Gh_A07G2143	A07	78107907	78110363	872	0	C
Gh_A08G0582	A08	10201739	10201873	855	0	_
Gh_A08G1382	A08	88559805	88561622	914	1	M
Gh_A08G1494	A08	91476413	91478476	685	0	_
Gh_A08G1810	A08	98649333	98651444	628	0	M
Gh_A08G1988	A08	101000937	101000972	818	0	C
Gh_A08G1996	A08	101068366	101070618	682	0	_
Gh_A09G0026	A09	625143	627119	198	1	_
Gh_A09G0759	A09	53683485	53684404	1236	3	S
Gh_A09G1156	A09	62988159	62988986	605	0	_
Gh_A09G1172	A09	63243734	63245178	687	0	M
Gh_A09G1303	A09	65689131	65689299	703	0	M
Gh_A09G1638	A09	69997497	69999524	559	3	_
Gh_A09G1921	A09	72382554	72382559	750	0	M
Gh_A09G2140	A09	74479522	74481414	658	0	_
Gh_A09G2143	A09	74497753	74499054	591	1	_
Gh_A10G0329	A10	3020586	3021701	579	1	_
Gh_A10G0617	A10	9748267	9749699	586	1	_
Gh_A10G1047	A10	42213640	42215766	665	1	M
Gh_A10G1770	A10	92198095	92199996	675	0	M
Gh_A11G0575	A11	5463699	5465786	436	2	S
Gh_A11G0632	A11	6082408	6084102	630	0	C
Gh_A11G0779	A11	7655550	7657979	433	0	_
Gh_A11G1224	A11	15145125	15147125	371	0	_
Gh_A11G1329	A11	17148684	17150498	803	1	M
Gh_A11G1384	A11	17986655	17989210	708	0	C
Gh_A11G2033	A11	60846512	60849190	633	0	_
Gh_A11G2278	A11	78173700	78176021	695	0	_
Gh_A11G2342	A11	80398636	80401723	631	2	_
Gh_A11G2657	A11	88760230	88762677	809	0	S
Gh_A11G2821	A11	91547614	91549488	666	0	M
Gh_A12G0429	A12	8846073	8847893	604	0	C
Gh_A12G0451	A12	9729071	9731122	851	0	_
Gh_A12G0458	A12	9844131	9846728	892	0	C
Gh_A12G0486	A12	10762251	10764449	773	0	C
Gh_A12G0524	A12	12772087	12774690	1082	1	C
Gh_A12G0594	A12	14932511	14934379	815	0	S
Gh_A12G0640	A12	18173806	18175860	624	0	_
Gh_A12G0724	A12	33582553	33584709	644	0	C
Gh_A12G0837	A12	53750338	53752686	606	0	M
Gh_A12G1295	A12	68556281	68558782	683	0	M
Gh_A12G1713	A12	78889086	78891194	865	0	C
Gh_A12G2221	A12	84946216	84946625	732	0	_
Gh_A12G2273	A12	85404977	85407562	867	0	C
Gh_A12G2290	A12	85581167	85583812	622	0	_
Gh_A13G0347	A13	4617242	4618999	684	0	M
Gh_A13G0665	A13	19813668	19814609	718	0	_
Gh_A13G0768	A13	32111193	32113471	782	0	_
Gh_A13G0941	A13	50384471	50386552	833	0	M
Gh_A13G1039	A13	58727004	58729817	702	0	_
Gh_A13G1155	A13	63819859	63822693	1096	6	_
Gh_A13G1386	A13	70475682	70477844	861	0	C
Gh_A13G1722	A13	76156127	76157590	881	0	_
Gh_D01G0153	D01	1123564	1125831	632	0	C
Gh_D01G0189	D01	1562265	1563941	769	1	M
Gh_D01G0242	D01	2111448	2113424	585	0	M
Gh_D01G0912	D01	15252852	15254996	313	0	_
Gh_D01G1178	D01	26881622	26883889	1302	7	_
Gh_D01G1658	D01	52388126	52390537	693	0	_
Gh_D01G1996	D01	58763398	58763580	937	0	M
Gh_D01G2009	D01	58908640	58910727	944	0	M
Gh_D01G2046	D01	59497956	59500607	720	0	_
Gh_D02G0089	D02	636022	638823	487	0	C
Gh_D02G0129	D02	1067471	1068672	755	0	C
Gh_D02G0135	D02	1207785	1209968	558	0	M
Gh_D02G0240	D02	2806527	2808359	658	0	S
Gh_D02G0472	D02	6181596	6181855	714	0	_
Gh_D02G1164	D02	35119386	35121797	755	0	_
Gh_D02G1741	D02	59724826	59726904	803	0	C
Gh_D02G2080	D02	64963923	64966394	2016	31	_
Gh_D03G0117	D03	878519	880495	695	0	M
Gh_D03G0871	D03	30153116	30155044	883	0	C
Gh_D03G1165	D03	38240707	38242662	933	0	C
Gh_D04G0152	D04	2209618	2212530	644	1	S
Gh_D04G0703	D04	14098264	14099307	727	0	M
Gh_D04G1061	D04	34656281	34658440	610	0	M
Gh_D04G1333	D04	43144553	43146388	792	5	_
Gh_D04G1483	D04	46688445	46690376	803	0	_
Gh_D04G1554	D04	47647659	47647704	692	0	_
Gh_D05G0051	D05	632487	634229	823	0	M
Gh_D05G0078	D05	837569	839935	830	0	S
Gh_D05G0556	D05	4484794	4486626	658	0	C
Gh_D05G0696	D05	5664906	5667140	642	0	C
Gh_D05G0877	D05	7439396	7440749	651	0	C
Gh_D05G0911	D05	7674029	7676293	882	0	C
Gh_D05G1812	D05	16485641	16485937	970	0	C
Gh_D05G3688	D05	61446138	61447988	659	1	C
Gh_D06G0241	D06	2554495	2556675	719	0	_
Gh_D06G0644	D06	11029676	11029775	611	0	C
Gh_D06G1374	D06	42902711	42904489	643	0	C
Gh_D06G1902	D06	59917523	59919958	1160	14	S
Gh_D06G1981	D06	61446915	61448882	580	0	M
Gh_D07G0238	D07	2561324	2563402	788	0	_
Gh_D07G0345	D07	3632002	3634212	610	0	S
Gh_D07G1067	D07	15132194	15135124	744	0	M
Gh_D07G1070	D07	15213977	15214687	736	1	_
Gh_D07G1380	D07	22310586	22313408	754	0	S
Gh_D07G1658	D07	34150528	34151048	1512	7	_
Gh_D07G1662	D07	34369650	34370323	616	0	C
Gh_D07G1876	D07	45859572	45861629	757	1	C
Gh_D07G2103	D07	51196534	51198420	705	2	M
Gh_D07G2355	D07	55163436	55165892	592	0	C
Gh_D08G0337	D08	3383262	3385061	811	0	C
Gh_D08G0677	D08	9148207	9151113	655	0	_
Gh_D08G1677	D08	52562688	52564505	692	0	M
Gh_D08G1792	D08	54468672	54470735	736	0	C
Gh_D08G2007	D08	58544487	58544912	976	0	C
Gh_D08G2170	D08	61233016	61235127	236	0	_
Gh_D08G2381	D08	63730761	63732998	940	0	M
Gh_D08G2390	D08	63802817	63805069	584	1	C
Gh_D09G0024	D09	728500	730476	404	1	_
Gh_D09G0761	D09	31929447	31930366	685	0	_
Gh_D09G1162	D09	38276476	38277303	628	0	M
Gh_D09G1178	D09	38564298	38565742	818	0	C
Gh_D09G1309	D09	40263094	40263262	855	0	_
Gh_D09G1732	D09	45064801	45066828	599	0	_
Gh_D09G2129	D09	48494934	48496616	968	0	S
Gh_D09G2346	D09	50455339	50457231	605	0	_
Gh_D09G2348	D09	50472536	50474455	687	0	M
Gh_D10G0335	D10	2897544	2900171	141	0	_
Gh_D10G0783	D10	9335982	9338588	703	0	M
Gh_D10G1472	D10	33606411	33608933	745	0	_
Gh_D10G2042	D10	56236418	56236513	750	0	M
Gh_D11G0660	D11	5728400	5730511	658	0	_
Gh_D11G0742	D11	6376598	6378709	733	2	_
Gh_D11G0908	D11	7845733	7848162	579	1	_
Gh_D11G1371	D11	13336624	13338621	586	1	_
Gh_D11G1398	D11	13778891	13780825	665	1	M
Gh_D11G1480	D11	14784966	14786882	675	0	M
Gh_D11G1526	D11	15297064	15299619	560	0	S
Gh_D11G2312	D11	43993185	43995863	630	0	C
Gh_D11G2584	D11	53620503	53622824	639	0	C
Gh_D11G2656	D11	55285355	55288442	875	0	C
Gh_D11G3019	D11	61678608	61681055	868	0	M
Gh_D11G3176	D11	64366892	64368766	840	0	C
Gh_D12G0250	D12	3334617	3336638	1070	8	_
Gh_D12G0425	D12	7004530	7006350	703	0	_
Gh_D12G0454	D12	7468287	7470338	703	0	M
Gh_D12G0461	D12	7550858	7553455	809	0	S
Gh_D12G0494	D12	8472393	8474591	665	0	M
Gh_D12G0538	D12	9872193	9874079	644	0	C
Gh_D12G0688	D12	14904944	14906842	638	0	C
Gh_D12G0748	D12	18294236	18296392	851	0	_
Gh_D12G0860	D12	28150683	28152737	892	0	_
Gh_D12G0901	D12	31474960	31477308	773	0	C
Gh_D12G1417	D12	43531132	43533633	1082	1	C
Gh_D12G1874	D12	51344176	51346284	815	0	C
Gh_D12G1918	D12	52105516	52107032	624	0	_
Gh_D12G2423	D12	57268196	57270574	673	0	_
Gh_D12G2427	D12	57321660	57324305	606	0	C
Gh_D12G2546	D12	58337733	58338539	683	0	M
Gh_D13G0390	D13	4310020	4311777	865	0	C
Gh_D13G0780	D13	13219458	13219493	732	0	_
Gh_D13G0901	D13	18247546	18249777	628	0	_
Gh_D13G1193	D13	35596020	35598101	632	0	C
Gh_D13G1291	D13	40444930	40447743	718	0	_
Gh_D13G1441	D13	45333461	45336295	684	0	C
Gh_D13G1697	D13	50768958	50770826	782	0	_
Gh_D13G2070	D13	56245510	56246973	833	0	M
Gh_A04G1432	scaffold1014_A04	59983	61914	702	0	C
Gh_Sca010496G01	scaffold10496	231	2318	539	1	_
Gh_Sca123232G01	scaffold123232	48	425	792	0	C
Gh_A05G3966	scaffold1245_A05	83446	85812	881	0	_
Gh_A05G3969	scaffold1246_A05	9392	9425	769	1	M
Gh_A06G1873	scaffold1259_A06	23673	25853	830	4	C
Gh_Sca141989G01	scaffold141989	70	360	585	0	M
Gh_Sca157535G01	scaffold157535	52	303	570	1	C
Gh_A07G2181	scaffold1716_A07	174198	176246	743	0	_
Gh_A07G2185	scaffold1790_A07	15853	16373	693	0	_
Gh_Sca181024G01	scaffold181024	78	233	937	0	M
Gh_Sca246681G01	scaffold246681	26	223	944	0	M
Gh_A11G3080	scaffold2748_A11	8967	10901	738	1	_
Gh_A01G2040	scaffold32_A01	107245	109500	487	0	C
Gh_A12G2587	scaffold3342_A12	18158	20056	727	0	M
Gh_A12G2727	scaffold3409_A12	55606	56412	695	0	_
Gh_D02G2396	scaffold3798_D02	74581	77073	175	0	_
Gh_D03G1703	scaffold3887_D03	176719	179367	143	0	_
Gh_D07G2446	scaffold4186_D07	46984	49551	144	0	_
Gh_D12G2728	scaffold4583_D12	60968	61036	126	0	_
Gh_Sca004802G02	scaffold4802	60807	62990	97	0	_
Gh_Sca072123G01	scaffold72123	22	549	84	0	_
Gh_Sca082327G01	scaffold82327	64	492	52	0	S
Gh_Sca084155G01	scaffold84155	33	467	66	0	_
GOBAR_AA09921	At_S0001	59116812	59116814	296	2	_
GOBAR_AA16151	At_S0001	21005128	21005130	354	5	S
GOBAR_AA16153	At_S0001	21078095	21078097	755	4	_
GOBAR_AA25897	At_S0001	2769682	2769684	517	0	_
GOBAR_AA28167	At_S0001	61626677	61626679	896	0	C
GOBAR_AA28237	At_S0001	60370334	60370336	586	1	_
GOBAR_AA28654	At_S0001	1751263	1751265	558	0	M
GOBAR_AA34559	At_S0001	1373671	1373673	970	1	C
GOBAR_AA03201	At_S0002	74813735	74813737	1124	3	C
GOBAR_AA12322	At_S0002	26967178	26967180	723	1	M
GOBAR_AA25847	At_S0002	5153896	5153898	798	5	_
GOBAR_AA28361	At_S0002	1277773	1277775	599	0	M
GOBAR_AA28362	At_S0002	1282227	1282229	610	0	M
GOBAR_AA32594	At_S0002	97969453	97969455	564	0	_
GOBAR_AA33130	At_S0002	1723300	1723302	601	1	C
GOBAR_AA36568	At_S0002	484756	484758	727	0	M
GOBAR_AA08048	At_S0003	48048452	48048454	715	1	_
GOBAR_AA12387	At_S0003	93987379	93987381	662	1	_
GOBAR_AA12923	At_S0003	8397446	8397448	651	0	C
GOBAR_AA14902	At_S0003	16324650	16324652	424	0	_
GOBAR_AA20269	At_S0003	101784301	101784303	732	3	M
GOBAR_AA30883	At_S0004	819937	819939	584	0	C
GOBAR_AA34679	At_S0004	58857696	58857698	661	2	_
GOBAR_AA38340	At_S0004	71583664	71583666	527	0	C
GOBAR_AA09751	At_S0005	98365561	98365563	928	1	C
GOBAR_AA16455	At_S0005	5478016	5478018	605	1	M
GOBAR_AA23966	At_S0005	8725955	8725957	733	0	_
GOBAR_AA23986	At_S0005	15998279	15998281	1413	8	_
GOBAR_AA39257	At_S0005	815402	815404	637	2	_
GOBAR_AA13100	At_S0006	83629550	83629552	592	0	C
GOBAR_AA14723	At_S0006	57896689	57896691	573	0	_
GOBAR_AA14724	At_S0006	57899264	57899266	329	0	_
GOBAR_AA15945	At_S0006	111697019	111697021	811	0	C
GOBAR_AA25278	At_S0006	16235986	16235988	706	0	M
GOBAR_AA29843	At_S0006	3301751	3301753	757	1	C
GOBAR_AA32302	At_S0006	84961128	84961130	634	1	_
GOBAR_AA04161	At_S0007	24874978	24874980	813	0	_
GOBAR_AA12061	At_S0007	2790388	2790390	933	2	M
GOBAR_AA15870	At_S0007	19366294	19366296	956	1	C
GOBAR_AA17450	At_S0007	3941026	3941028	736	0	C
GOBAR_AA21405	At_S0007	80762589	80762591	685	0	_
GOBAR_AA24195	At_S0007	89185786	89185788	628	0	M
GOBAR_AA24443	At_S0007	19476569	19476571	833	3	S
GOBAR_AA26881	At_S0007	93470924	93470926	831	3	C
GOBAR_AA28628	At_S0007	5197413	5197415	1363	17	_
GOBAR_AA29285	At_S0007	59863008	59863010	682	0	_
GOBAR_AA36335	At_S0007	32393155	32393157	1172	2	C
GOBAR_AA02422	At_S0008	101773081	101773083	605	0	_
GOBAR_AA05746	At_S0008	3346038	3346040	605	1	C
GOBAR_AA13813	At_S0008	11498027	11498029	953	1	S
GOBAR_AA19031	At_S0008	113571129	113571131	1444	7	S
GOBAR_AA23445	At_S0008	104007618	104007620	915	1	M
GOBAR_AA25515	At_S0008	111410617	111410619	703	0	M
GOBAR_AA33689	At_S0008	113498206	113498208	651	1	S
GOBAR_AA00732	At_S0009	666883	666885	659	0	_
GOBAR_AA08629	At_S0009	63477874	63477876	636	2	_
GOBAR_AA21892	At_S0009	54813545	54813547	418	2	_
GOBAR_AA21895	At_S0009	54857177	54857179	91	2	_
GOBAR_AA24276	At_S0009	65855529	65855531	640	2	M
GOBAR_AA31786	At_S0009	76191928	76191930	924	1	C
GOBAR_AA31790	At_S0009	76211616	76211618	639	0	S
GOBAR_AA02841	At_S0010	10919325	10919327	737	0	_
GOBAR_AA03862	At_S0010	101471023	101471025	313	4	_
GOBAR_AA11572	At_S0010	53240827	53240829	1353	3	C
GOBAR_AA30383	At_S0010	3424865	3424867	1296	1	C
GOBAR_AA05324	At_S0011	110061936	110061938	706	0	_
GOBAR_AA09700	At_S0011	17772065	17772067	2214	9	C
GOBAR_AA16106	At_S0011	113245303	113245305	556	1	_
GOBAR_AA20521	At_S0011	5855562	5855564	600	0	_
GOBAR_AA24217	At_S0011	98486481	98486483	669	1	C
GOBAR_AA26382	At_S0011	15466374	15466376	644	0	C
GOBAR_AA29215	At_S0011	8204729	8204731	449	1	_
GOBAR_AA38069	At_S0011	16892233	16892235	785	0	C
GOBAR_AA38953	At_S0011	6521939	6521941	703	0	M
GOBAR_AA02374	At_S0012	3587914	3587916	673	0	M
GOBAR_AA08153	At_S0012	11225659	11225661	732	0	_
GOBAR_AA11285	At_S0012	101236175	101236177	1032	1	_
GOBAR_AA12245	At_S0012	15529277	15529279	592	0	_
GOBAR_AA17793	At_S0012	41451930	41451932	806	1	_
GOBAR_AA18315	At_S0012	42835375	42835377	632	0	C
GOBAR_AA20943	At_S0012	102531414	102531416	763	1	M
GOBAR_AA22083	At_S0012	100356004	100356006	480	1	C
GOBAR_AA22545	At_S0012	94828166	94828168	559	2	M
GOBAR_AA22792	At_S0012	13330779	13330781	799	0	S
GOBAR_AA24739	At_S0012	100804249	100804251	144	0	_
GOBAR_AA24740	At_S0012	100803384	100803386	858	0	C
GOBAR_AA30065	At_S0012	19112932	19112934	664	0	_
GOBAR_AA32865	At_S0012	83249997	83249999	909	1	M
GOBAR_AA33487	At_S0012	9318915	9318917	617	0	C
GOBAR_AA04344	At_S0013	86710718	86710720	1137	4	_
GOBAR_AA06588	At_S0013	78650297	78650299	586	0	S
GOBAR_AA11791	At_S0013	97368350	97368352	749	1	_
GOBAR_AA12611	At_S0013	49956455	49956457	1291	8	_
GOBAR_AA14095	At_S0013	103802604	103802606	487	0	C
GOBAR_AA38674	At_S0013	91284167	91284169	961	2	M
GOBAR_AA00296	At_S0020	481629	481631	892	0	C
GOBAR_AA02650	At_S0072	5683	5685	684	1	_
GOBAR_AA11811	At_S0305	238699	238701	755	0	_
GOBAR_AA16579	At_S0429	4403	4405	702	0	_
GOBAR_AA24508	At_S0617	25630	25632	910	2	C
GOBAR_AA27240	At_S0689	95845	95847	1078	0	C
GOBAR_AA40102	At_S1370	14806	14808	1817	27	_
GOBAR_DD00502	Dt_S0001	58464751	58464753	1908	28	_
GOBAR_DD04999	Dt_S0001	1155975	1155977	712	1	C
GOBAR_DD11066	Dt_S0001	17672570	17672572	703	1	_
GOBAR_DD13440	Dt_S0001	53164295	53164297	803	0	C
GOBAR_DD16403	Dt_S0001	58564726	58564728	616	0	S
GOBAR_DD24064	Dt_S0001	1615885	1615887	558	0	M
GOBAR_DD03637	Dt_S0002	25716501	25716503	1069	1	S
GOBAR_DD09792	Dt_S0002	63667718	63667720	618	2	M
GOBAR_DD19796	Dt_S0002	59100229	59100231	692	0	_
GOBAR_DD22361	Dt_S0002	3247724	3247726	610	0	M
GOBAR_DD24355	Dt_S0002	34846104	34846106	159	0	_
GOBAR_DD26018	Dt_S0002	6227893	6227895	544	0	_
GOBAR_DD29940	Dt_S0002	1843837	1843839	780	3	_
GOBAR_DD29944	Dt_S0002	1893586	1893588	670	0	M
GOBAR_DD37733	Dt_S0002	63698433	63698435	772	3	_
GOBAR_DD37832	Dt_S0002	1731594	1731596	556	0	S
GOBAR_DD01206	Dt_S0003	36393043	36393045	642	0	_
GOBAR_DD07549	Dt_S0003	868017	868019	564	0	_
GOBAR_DD09520	Dt_S0003	15162867	15162869	760	2	C
GOBAR_DD33973	Dt_S0003	44038655	44038657	651	0	C
GOBAR_DD08834	Dt_S0004	41815774	41815776	611	0	C
GOBAR_DD15801	Dt_S0004	2857252	2857254	858	0	_
GOBAR_DD26562	Dt_S0004	45222315	45222317	643	0	C
GOBAR_DD31520	Dt_S0004	45930730	45930732	718	2	_
GOBAR_DD06176	Dt_S0005	58848820	58848822	616	0	C
GOBAR_DD15599	Dt_S0005	8250442	8250444	735	0	_
GOBAR_DD21204	Dt_S0005	17766693	17766695	1512	7	_
GOBAR_DD23854	Dt_S0005	5284969	5284971	654	1	S
GOBAR_DD32649	Dt_S0005	1081918	1081920	788	0	_
GOBAR_DD37403	Dt_S0005	5098051	5098053	610	0	S
GOBAR_DD37880	Dt_S0005	7932606	7932608	735	0	_
GOBAR_DD01758	Dt_S0006	28258334	28258336	546	1	_
GOBAR_DD03254	Dt_S0006	42579235	42579237	553	9	_
GOBAR_DD04717	Dt_S0006	7001465	7001467	1105	0	_
GOBAR_DD11714	Dt_S0006	57054930	57054932	635	1	_
GOBAR_DD13595	Dt_S0006	3225125	3225127	694	2	C
GOBAR_DD13959	Dt_S0006	41038939	41038941	592	0	C
GOBAR_DD19584	Dt_S0006	55977182	55977184	811	0	C
GOBAR_DD38242	Dt_S0006	57701963	57701965	655	0	_
GOBAR_DD08488	Dt_S0007	47040868	47040870	685	0	_
GOBAR_DD09425	Dt_S0007	16311507	16311509	857	1	C
GOBAR_DD09943	Dt_S0007	35752401	35752403	663	1	_
GOBAR_DD10479	Dt_S0007	23858657	23858659	1172	2	C
GOBAR_DD11850	Dt_S0007	55069426	55069428	818	0	C
GOBAR_DD15895	Dt_S0007	4434515	4434517	668	1	C
GOBAR_DD20764	Dt_S0007	51394643	51394645	314	6	_
GOBAR_DD30693	Dt_S0007	3210646	3210648	692	0	M
GOBAR_DD31628	Dt_S0007	5731509	5731511	262	2	_
GOBAR_DD35880	Dt_S0007	20376656	20376658	855	0	_
GOBAR_DD36560	Dt_S0007	36011402	36011404	211	0	M
GOBAR_DD03089	Dt_S0008	58682419	58682421	664	3	M
GOBAR_DD19314	Dt_S0008	50736561	50736563	605	0	_
GOBAR_DD19527	Dt_S0008	9391312	9391314	968	0	S
GOBAR_DD28118	Dt_S0008	3949029	3949031	599	0	_
GOBAR_DD29858	Dt_S0008	52233807	52233809	964	9	_
GOBAR_DD31556	Dt_S0008	61025536	61025538	788	0	M
GOBAR_DD06946	Dt_S0009	38597551	38597553	651	2	M
GOBAR_DD20453	Dt_S0009	45786554	45786556	591	0	_
GOBAR_DD24232	Dt_S0009	47116109	47116111	795	2	C
GOBAR_DD24456	Dt_S0009	224669	224671	658	0	_
GOBAR_DD25932	Dt_S0009	36833831	36833833	615	2	S
GOBAR_DD30522	Dt_S0009	30635033	30635035	132	2	_
GOBAR_DD30523	Dt_S0009	30654414	30654416	595	1	_
GOBAR_DD34428	Dt_S0009	36703272	36703274	568	2	_
GOBAR_DD36365	Dt_S0009	36926890	36926892	586	1	_
GOBAR_DD07612	Dt_S0010	54166271	54166273	1071	7	_
GOBAR_DD27125	Dt_S0010	32416209	32416211	790	2	C
GOBAR_DD29525	Dt_S0010	3330984	3330986	875	0	C
GOBAR_DD03135	Dt_S0011	12195226	12195228	700	1	M
GOBAR_DD10574	Dt_S0011	12974201	12974203	644	0	C
GOBAR_DD12502	Dt_S0011	63949508	63949510	556	1	_
GOBAR_DD13013	Dt_S0011	7829376	7829378	783	2	_
GOBAR_DD15244	Dt_S0011	6017401	6017403	703	0	M
GOBAR_DD15406	Dt_S0011	14116969	14116971	639	3	_
GOBAR_DD17455	Dt_S0011	7059183	7059185	897	7	_
GOBAR_DD30304	Dt_S0011	53058803	53058805	670	1	C
GOBAR_DD33682	Dt_S0011	54694339	54694341	743	7	_
GOBAR_DD33683	Dt_S0011	54698543	54698545	799	0	S
GOBAR_DD33910	Dt_S0011	61656534	61656536	672	1	_
GOBAR_DD00255	Dt_S0012	2934211	2934213	673	0	_
GOBAR_DD00789	Dt_S0012	13572079	13572081	622	0	_
GOBAR_DD02429	Dt_S0012	11472182	11472184	623	1	C
GOBAR_DD04482	Dt_S0012	15966902	15966904	631	1	_
GOBAR_DD04982	Dt_S0012	29493420	29493422	782	0	_
GOBAR_DD06036	Dt_S0012	711894	711896	683	0	M
GOBAR_DD06747	Dt_S0012	48912143	48912145	701	0	C
GOBAR_DD08185	Dt_S0012	41160420	41160422	775	0	_
GOBAR_DD10094	Dt_S0012	49524978	49524980	539	1	_
GOBAR_DD10316	Dt_S0012	6211177	6211179	617	0	C
GOBAR_DD10853	Dt_S0012	55352535	55352537	1199	0	C
GOBAR_DD10882	Dt_S0012	55623246	55623248	838	1	C
GOBAR_DD18779	Dt_S0012	57142929	57142931	761	3	M
GOBAR_DD34053	Dt_S0012	7461460	7461462	622	0	S
GOBAR_DD34817	Dt_S0012	8759364	8759366	874	0	C
GOBAR_DD37372	Dt_S0012	57378188	57378190	761	3	M
GOBAR_DD37886	Dt_S0012	49004582	49004584	701	0	C
GOBAR_DD01834	Dt_S0013	36445982	36445984	740	1	_
GOBAR_DD06602	Dt_S0013	50851109	50851111	697	2	S
GOBAR_DD06715	Dt_S0013	12942063	12942065	487	1	C
GOBAR_DD09400	Dt_S0013	45597851	45597853	848	3	S
GOBAR_DD11547	Dt_S0013	40675941	40675943	937	0	M
GOBAR_DD17011	Dt_S0013	56016561	56016563	214	0	_
GOBAR_DD30932	Dt_S0013	18157495	18157497	715	1	_
GOBAR_DD18750	Dt_S0250	132776	132778	656	2	M
GOBAR_DD20705	Dt_S0277	50169	50171	1001	3	_
GOBAR_DD30172	Dt_S0379	39785	39787	1168	4	_
GOBAR_DD30508	Dt_S0395	104093	104095	687	0	M
GOBAR_DD32180	Dt_S0425	81410	81412	698	1	M
GOBAR_DD36164	Dt_S0532	21842	21844	845	2	C

## Sheet: G. hirsutum
19 G. raimondii gene lost in the evolution	32 G. raimondii gene	Similarity/(one to multiple)	65 G. hirsutum gene		11 G. arboretum gene lost in the evolution	15 G. arboretum gene	Similarity/(one to multiple)	31 G. hirsutum gene	G. hirsutum gene gain in the evolution
Gorai.001G040600.1	Gorai.001G029200.1	97.54	Gh_A07G0183		Cotton_A_01226	Cotton_A_00793	99.59	Gh_A03G1665	Gh_A06G1120
Gorai.001G121300.1	Gorai.001G029200.1	98.7	Gh_D07G0238		Cotton_A_01590	Cotton_A_00793	95.04	Gh_D08G2007
Gorai.001G155500.1	Gorai.001G191900.1	96	Gh_A07G2185		Cotton_A_04407	Cotton_A_05775	80.99	Gh_A08G1988
Gorai.002G120600.1	Gorai.001G191900.1	98.97	Gh_D07G1658		Cotton_A_06956	Cotton_A_05775	97.1	Gh_D08G2381
Gorai.002G151700.2	Gorai.001G214700.1	97.66	Gh_A07G1662		Cotton_A_07988	Cotton_A_05786	99.6	Gh_A08G1996
Gorai.002G238700.1	Gorai.001G214700.1	98.83	Gh_D07G1876		Cotton_A_17617	Cotton_A_05786	98	Gh_D08G2390
Gorai.004G262700.1	Gorai.002G032400.1	97.72	Gh_A01G0244		Cotton_A_23710	Cotton_A_07524	90.67	Gh_A10G0617
Gorai.005G031300.1	Gorai.002G032400.1	99.39	Gh_D01G0242		Cotton_A_25990	Cotton_A_07524	97.58	Gh_D10G0783
Gorai.006G139600.1	Gorai.002G057400.1	97.62	Gh_A02G1199		Cotton_A_32227	Cotton_A_09578	99.2	Gh_A07G0992
Gorai.008G205900.2	Gorai.002G057400.1	99.21	Gh_D03G1703		Cotton_A_36721	Cotton_A_09578	97.88	Gh_D07G1070
Gorai.009G198200.2	Gorai.003G012700.1	98.02	Gh_A02G1606		Cotton_A_39671	Cotton_A_10175	98.61	Gh_A01G1752
Gorai.010G001600.1	Gorai.003G012700.1	98.78	Gh_D03G0117			Cotton_A_10175	92.05	Gh_D01G1996
Gorai.010G032300.1	Gorai.003G097100.1	97.51	Gh_A03G0587			Cotton_A_10449	99.07	Gh_A10G1770
Gorai.010G075400.2	Gorai.003G097100.1	98.91	Gh_D03G0871			Cotton_A_10449	98.83	Gh_D10G2042
Gorai.011G088900.1	Gorai.004G038400.1	85.78	Gh_A01G1674			Cotton_A_17704	99.05	Gh_A12G0429
Gorai.011G229900.1	Gorai.004G038400.1	99.5	Gh_D08G0337			Cotton_A_17704	98.81	Gh_Sca157535G01
Gorai.011G229900.2	Gorai.005G014400.1	91.25	Gh_D02G0129			Cotton_A_22374	99.17	Gh_A13G1386
Gorai.011G229900.3	Gorai.005G014400.1	99.59	Gh_D02G0135			Cotton_A_22374	100	Gh_Sca181024G01
Gorai.013G131400.1	Gorai.005G026900.1	98.03	Gh_A02G0176			Cotton_A_23272	99.42	Gh_A13G0941
	Gorai.005G026900.1	98.85	Gh_D02G0240			Cotton_A_23272	96.97	Gh_D13G1193
	Gorai.005G053800.1	99.12	Gh_D02G0472			Cotton_A_28020	99.33	Gh_A07G0290
	Gorai.005G053800.1	100	Gh_Sca246681G01			Cotton_A_28020	96.88	Gh_D07G0345
	Gorai.005G119200.1	96.84	Gh_A02G0889			Cotton_A_28020	100	Gh_Sca141989G01
	Gorai.005G119200.1	99.52	Gh_D02G2396			Cotton_A_32575	99.3	Gh_A12G0724
	Gorai.006G267000.1	97.46	Gh_A09G2143			Cotton_A_32575	99.21	Gh_Sca123232G01
	Gorai.006G267000.1	98.12	Gh_D09G2348			Cotton_A_34312	96.38	Gh_A07G1269
	Gorai.007G071200.1	98.99	Gh_D11G0660			Cotton_A_34312	97.87	Gh_D07G1380
	Gorai.007G071200.1	98.85	Gh_Sca010496G01			Cotton_A_34884	99.21	Gh_A06G1873
	Gorai.007G079800.1	99.57	Gh_D11G0742			Cotton_A_34884	98.55	Gh_D06G0241
	Gorai.007G079800.1	100	Gh_Sca072123G01			Cotton_A_39243	99.71	Gh_A07G2181
	Gorai.007G079800.2	99.57	Gh_D11G0742			Cotton_A_39243	92.17	Gh_D07G1662
	Gorai.007G079800.2	100	Gh_Sca072123G01
	Gorai.008G048000.1	98.18	Gh_D12G0425
	Gorai.008G048000.1	98.81	Gh_Sca157535G01			71 G. arboretum gene	Similarity/(one to one)	71 G. hirsutum gene
	Gorai.008G050500.1	96.49	Gh_A12G0451			Cotton_A_00058	98.21	Gh_A01G0144
	Gorai.008G050500.1	98.54	Gh_D12G0454			Cotton_A_00096	98.8	Gh_A01G2040
	Gorai.008G050500.2	96.49	Gh_A12G0451			Cotton_A_00501	99.04	Gh_A01G1807
	Gorai.008G050500.2	98.54	Gh_D12G0454			Cotton_A_01069	99.19	Gh_A05G0567
	Gorai.008G050500.3	96.49	Gh_A12G0451			Cotton_A_01429	99.21	Gh_A12G2727
	Gorai.008G050500.3	98.54	Gh_D12G0454			Cotton_A_02968	99.38	Gh_A11G3080
	Gorai.008G051300.1	97.57	Gh_A12G0458			Cotton_A_02993	98.65	Gh_A11G1224
	Gorai.008G051300.1	99.31	Gh_D12G0461			Cotton_A_03411	99.16	Gh_A04G0834
	Gorai.008G055100.1	98.09	Gh_A12G0486			Cotton_A_03702	99.41	Gh_A11G1384
	Gorai.008G055100.1	99.18	Gh_D12G0494			Cotton_A_03759	93.89	Gh_A11G1329
	Gorai.008G067300.1	97.91	Gh_A12G0594			Cotton_A_04367	98.5	Gh_A02G0074
	Gorai.008G067300.1	98.61	Gh_Sca084155G01			Cotton_A_04410	99.45	Gh_Sca004802G02
	Gorai.008G073100.1	97.63	Gh_A12G0640			Cotton_A_04493	99.28	Gh_A12G1295
	Gorai.008G073100.1	98.95	Gh_D12G0860			Cotton_A_05942	98.89	Gh_A07G1888
	Gorai.008G073100.1	98.6	Gh_Sca082327G01			Cotton_A_06599	98.88	Gh_A11G2821
	Gorai.008G086300.1	99.03	Gh_D12G0748			Cotton_A_07464	97.08	Gh_A04G0046
	Gorai.008G086300.1	99.21	Gh_Sca123232G01			Cotton_A_07793	99.66	Gh_A09G1172
	Gorai.009G451200.1	97.08	Gh_A04G0046			Cotton_A_07815	99.83	Gh_A09G1156
	Gorai.009G451200.1	98.54	Gh_D05G3688			Cotton_A_08048	99.15	Gh_A12G1713
	Gorai.010G214600.1	97.8	Gh_A06G1533			Cotton_A_09458	99.22	Gh_A11G0575
	Gorai.010G214600.1	99.62	Gh_D06G1902			Cotton_A_09575	99.9	Gh_A07G0989
	Gorai.012G146600.1	95.88	Gh_A04G1004			Cotton_A_09637	99.84	Gh_A09G2140
	Gorai.012G146600.1	100	Gh_D04G1554			Cotton_A_09744	99.4	Gh_A08G1382
	Gorai.013G043300.1	97.95	Gh_A13G0347			Cotton_A_11411	99.5	Gh_A12G0524
	Gorai.013G043300.1	98.63	Gh_D13G0390			Cotton_A_12931	99.59	Gh_A05G0745
	Gorai.013G086000.2	97.76	Gh_A13G0665			Cotton_A_13417	99.48	Gh_A09G1303
	Gorai.013G086000.2	98.92	Gh_D13G0780			Cotton_A_15028	98.87	Gh_A11G2342
	Gorai.013G198600.1	91.81	Gh_D13G1697			Cotton_A_15473	93.99	Gh_A11G0632
	Gorai.013G198600.1	100	Gh_Sca181024G01			Cotton_A_15541	99.47	Gh_A13G1155
	Gorai.013G228400.1	98.36	Gh_A13G1722			Cotton_A_15955	98.98	Gh_A12G0837
	Gorai.013G228400.1	98.97	Gh_D13G2070			Cotton_A_16255	99.75	Gh_A05G3966
						Cotton_A_16485	99.26	Gh_A09G1921
						Cotton_A_16896	99.41	Gh_A05G3969
	75 G. raimondii gene	Similarity/(one to one)	75 G. hirsutum gene			Cotton_A_17392	95.6	Gh_A12G2221
	Gorai.001G121000.1	99.16	Gh_D07G1067			Cotton_A_17523	99.19	Gh_A10G0329
	Gorai.001G138400.1	98.71	Gh_D07G2446			Cotton_A_17735	99.27	Gh_A12G2273
	Gorai.001G240800.1	99.04	Gh_D07G2103			Cotton_A_17776	99.32	Gh_A12G2290
	Gorai.001G275900.1	99.39	Gh_D07G2355			Cotton_A_18227	99.34	Gh_A06G0016
	Gorai.002G016600.1	98.35	Gh_D01G0153			Cotton_A_18858	99.85	Gh_A06G0569
	Gorai.002G020900.1	99.28	Gh_D01G0189			Cotton_A_20263	99.11	Gh_A05G3440
	Gorai.002G120300.1	98.46	Gh_D01G0912			Cotton_A_20564	98.79	Gh_A09G0026
	Gorai.002G151700.1	99.21	Gh_D01G1178			Cotton_A_21338	93.99	Gh_D12G0494
	Gorai.002G200700.1	99.38	Gh_D01G1658			Cotton_A_21752	99.25	Gh_A01G1420
	Gorai.002G240300.1	98.56	Gh_D01G2009			Cotton_A_22715	99.39	Gh_A07G2143
	Gorai.002G244700.1	98.19	Gh_D01G2046			Cotton_A_22853	98.27	Gh_A02G0419
	Gorai.003G128500.1	99.39	Gh_D03G1165			Cotton_A_23711	93.63	Gh_A09G0759
	Gorai.004G076500.1	99.17	Gh_D08G0677			Cotton_A_24301	99.57	Gh_A08G1810
	Gorai.004G181600.1	99.17	Gh_D08G1677			Cotton_A_25415	99.3	Gh_A04G0600
	Gorai.004G194300.1	98.98	Gh_D08G1792			Cotton_A_25992	84.82	Gh_A08G0582
	Gorai.004G235300.1	99.72	Gh_D08G2170			Cotton_A_26302	99.47	Gh_A08G1494
	Gorai.005G009200.1	100	Gh_D02G0089			Cotton_A_27094	98.25	Gh_A02G0212
	Gorai.005G136900.1	98.75	Gh_D02G1164			Cotton_A_27301	98.8	Gh_A09G1638
	Gorai.005G192500.1	98.84	Gh_D02G1741			Cotton_A_27764	99.39	Gh_A03G0377
	Gorai.005G192500.2	98.84	Gh_D02G1741			Cotton_A_28264	99.14	Gh_A04G1432
	Gorai.005G237500.1	98.77	Gh_D02G2080			Cotton_A_28368	99.22	Gh_A11G2278
	Gorai.006G003200.1	99.7	Gh_D09G0024			Cotton_A_28557	99.86	Gh_A01G0876
	Gorai.006G094600.1	93.86	Gh_D09G0761			Cotton_A_29248	98.89	Gh_A06G1611
	Gorai.006G137700.1	98.62	Gh_D09G1162			Cotton_A_30003	99.38	Gh_A07G1125
	Gorai.006G139500.1	98.46	Gh_D09G1178			Cotton_A_30439	99.25	Gh_A13G1039
	Gorai.006G154800.1	99.1	Gh_D09G1309			Cotton_A_30825	99.7	Gh_A05G2917
	Gorai.006G199900.1	99.11	Gh_D09G1732			Cotton_A_30897	99.42	Gh_A03G1304
	Gorai.006G243300.1	98.59	Gh_D09G2129			Cotton_A_32339	99.2	Gh_A11G0779
	Gorai.006G266600.1	99.05	Gh_D09G2346			Cotton_A_33828	98.93	Gh_A13G0768
	Gorai.007G096200.1	98.89	Gh_D11G0908			Cotton_A_34976	99.47	Gh_A10G1047
	Gorai.007G149300.1	98.35	Gh_D11G1371			Cotton_A_35950	99.44	Gh_A01G1766
	Gorai.007G152300.1	99.38	Gh_D11G1398			Cotton_A_36351	99.55	Gh_A11G2033
	Gorai.007G160800.1	99.06	Gh_D11G1480			Cotton_A_36910	99.37	Gh_A12G2587
	Gorai.007G166400.1	99.18	Gh_D11G1526			Cotton_A_37555	99.29	Gh_A11G2657
	Gorai.007G249300.1	99.22	Gh_D11G2312			Cotton_A_37726	99.21	Gh_A01G1103
	Gorai.007G280600.1	97.93	Gh_D11G2584			Cotton_A_37812	99.63	Gh_A03G0850
	Gorai.007G288400.1	99.26	Gh_D11G2656			Cotton_A_38340	99.48	Gh_A06G1003
	Gorai.007G344400.1	99.51	Gh_D11G3019
	Gorai.007G363000.1	99.36	Gh_D11G3176
	Gorai.008G028200.1	96.73	Gh_D12G0250
	Gorai.008G059500.1	98.1	Gh_D12G0538
	Gorai.008G079500.1	99.19	Gh_D12G0688
	Gorai.008G102200.1	98.85	Gh_D12G0901
	Gorai.008G156300.1	98.68	Gh_D12G1417
	Gorai.008G205900.1	99.29	Gh_D12G1874
	Gorai.008G210900.1	98.89	Gh_D12G1918
	Gorai.008G210900.2	98.89	Gh_D12G1918
	Gorai.008G264200.1	95.4	Gh_D12G2728
	Gorai.008G269700.1	98.06	Gh_D12G2423
	Gorai.008G273500.1	98.98	Gh_D12G2427
	Gorai.008G289000.1	99.48	Gh_D12G2546
	Gorai.009G006800.1	98.79	Gh_D05G0051
	Gorai.009G009600.1	100	Gh_D05G0078
	Gorai.009G057300.1	98.52	Gh_D05G0556
	Gorai.009G072800.1	98.79	Gh_D05G0696
	Gorai.009G092600.1	98.23	Gh_D05G0877
	Gorai.009G097000.1	99.73	Gh_D05G0911
	Gorai.009G198200.1	99.67	Gh_D05G1812
	Gorai.009G198200.3	97.79	Gh_A05G1630
	Gorai.009G414200.1	98.75	Gh_D04G1061
	Gorai.010G032300.2	99.24	Gh_D06G0241
	Gorai.010G075400.1	95.97	Gh_D06G0644
	Gorai.010G153300.1	98.99	Gh_D06G1374
	Gorai.010G158200.1	75.86	Gh_Sca181024G01
	Gorai.010G224300.1	99.54	Gh_D06G1981
	Gorai.011G038100.1	99.31	Gh_D10G0335
	Gorai.011G165700.1	99.29	Gh_D10G1472
	Gorai.012G021300.1	99.38	Gh_D04G0152
	Gorai.012G082800.1	98.33	Gh_D04G0703
	Gorai.012G121600.1	99.35	Gh_D04G1333
	Gorai.012G138600.1	99.38	Gh_D04G1483
	Gorai.013G086000.1	97.76	Gh_A13G0665
	Gorai.013G098500.1	98.38	Gh_D13G0901
	Gorai.013G142700.1	99.25	Gh_D13G1291
	Gorai.013G158100.1	99.26	Gh_D13G1441

## Sheet: G. barbadense
25 G. arboretum gene lost in the evolution	15 G. arboretum gene	Similarity/(one to multiple)	32 G. barbadense gene		36 G. raimondii gene lost in the evolution	30 G. raimondii gene	Similarity/(one to multiple)	62 G. barbadense gene	7 G. barbadense gene gain in the evolution
Cotton_A_01069	Cotton_A_00793	99.32	GOBAR_AA20269		Gorai.001G121000.1	Gorai.001G029200.1	97.72	GOBAR_AA12061	GOBAR_AA09921
Cotton_A_01590	Cotton_A_00793	97.72	GOBAR_DD09792		Gorai.001G121300.1	Gorai.001G029200.1	99.13	GOBAR_DD30693	GOBAR_AA28628
Cotton_A_02993	Cotton_A_00793	97.72	GOBAR_DD37733		Gorai.002G151700.1	Gorai.001G155500.1	97.95	GOBAR_AA36335	GOBAR_AA30883
Cotton_A_04407	Cotton_A_04367	97	GOBAR_AA24508		Gorai.002G151700.2	Gorai.001G155500.1	99.23	GOBAR_DD10479	GOBAR_AA33130
Cotton_A_06599	Cotton_A_04367	97.8	GOBAR_DD36164		Gorai.002G244700.1	Gorai.001G214700.1	98.1	GOBAR_AA21405	GOBAR_DD10853
Cotton_A_06956	Cotton_A_05786	99.87	GOBAR_AA19031		Gorai.003G128500.1	Gorai.001G214700.1	99.27	GOBAR_DD08488	GOBAR_DD17455
Cotton_A_07464	Cotton_A_05786	98.1	GOBAR_DD31556		Gorai.004G262700.1	Gorai.001G275900.1	93.77	GOBAR_AA26881	GOBAR_DD31628
Cotton_A_07815	Cotton_A_05942	99.2	GOBAR_AA24195		Gorai.005G009200.1	Gorai.001G275900.1	99.39	GOBAR_DD11850
Cotton_A_07988	Cotton_A_05942	97.5	GOBAR_DD20764		Gorai.005G031300.1	Gorai.002G057400.1	85.11	GOBAR_AA03201
Cotton_A_10175	Cotton_A_09578	99.35	GOBAR_AA24443		Gorai.005G237500.1	Gorai.002G057400.1	85.67	GOBAR_DD09520
Cotton_A_15028	Cotton_A_09578	95.88	GOBAR_DD09425		Gorai.006G139600.1	Gorai.002G238700.1	98.77	GOBAR_AA40102
Cotton_A_16255	Cotton_A_09637	99.5	GOBAR_AA31786		Gorai.006G266600.1	Gorai.002G238700.1	98.93	GOBAR_DD00502
Cotton_A_16485	Cotton_A_09637	76.01	GOBAR_DD24232		Gorai.007G071200.1	Gorai.003G012700.1	97.87	GOBAR_AA32594
Cotton_A_18227	Cotton_A_10449	100	GOBAR_AA03862		Gorai.007G079800.1	Gorai.003G012700.1	99.11	GOBAR_DD07549
Cotton_A_21338	Cotton_A_10449	98.92	GOBAR_DD07612		Gorai.007G249300.1	Gorai.003G097100.1	96.93	GOBAR_AA14902
Cotton_A_21752	Cotton_A_23272	99.15	GOBAR_AA06588		Gorai.007G280600.1	Gorai.003G097100.1	99.07	GOBAR_DD01206
Cotton_A_22715	Cotton_A_23272	96.07	GOBAR_DD01834		Gorai.008G051300.1	Gorai.005G014400.1	97.05	GOBAR_DD29940
Cotton_A_25990	Cotton_A_23710	85.39	GOBAR_AA21895		Gorai.008G086300.1	Gorai.005G014400.1	90.1	GOBAR_DD29944
Cotton_A_27094	Cotton_A_23710	85.16	GOBAR_DD30522		Gorai.008G205900.2	Gorai.005G014400.1	98.38	GOBAR_DD37832
Cotton_A_27301	Cotton_A_26302	97.11	GOBAR_AA23445		Gorai.008G264200.1	Gorai.005G026900.1	98.66	GOBAR_AA28361
Cotton_A_28264	Cotton_A_26302	99.12	GOBAR_DD30508		Gorai.008G273500.1	Gorai.005G026900.1	98.2	GOBAR_AA28362
Cotton_A_30825	Cotton_A_27764	98.77	GOBAR_AA12923		Gorai.009G006800.1	Gorai.005G026900.1	98.85	GOBAR_DD22361
Cotton_A_34312	Cotton_A_27764	98.77	GOBAR_DD33973		Gorai.009G097000.1	Gorai.005G119200.1	84.14	GOBAR_AA12322
Cotton_A_36721	Cotton_A_28368	99.11	GOBAR_AA24217		Gorai.009G414200.1	Gorai.005G119200.1	100	GOBAR_DD03637
Cotton_A_39671	Cotton_A_28368	97.88	GOBAR_DD30304		Gorai.010G001600.1	Gorai.006G139500.1	98.97	GOBAR_AA08629
	Cotton_A_33828	99.03	GOBAR_AA12611		Gorai.010G032300.2	Gorai.006G139500.1	93.81	GOBAR_DD25932
	Cotton_A_33828	94.34	GOBAR_DD30932		Gorai.010G075400.2	Gorai.007G166400.1	99.29	GOBAR_AA27240
	Cotton_A_38340	98.95	GOBAR_AA14723		Gorai.011G088900.1	Gorai.007G166400.1	97.51	GOBAR_DD30172
	Cotton_A_38340	98.18	GOBAR_AA14724		Gorai.011G229900.1	Gorai.007G288400.1	87.5	GOBAR_DD33682
	Cotton_A_38340	92.98	GOBAR_DD01758		Gorai.011G229900.2	Gorai.007G288400.1	98.73	GOBAR_DD33683
	Cotton_A_39243	99.56	GOBAR_AA29285		Gorai.011G229900.3	Gorai.007G363000.1	85.1	GOBAR_AA16106
	Cotton_A_39243	99.05	GOBAR_DD36560		Gorai.012G082800.1	Gorai.007G363000.1	85.1	GOBAR_DD12502
					Gorai.013G043300.1	Gorai.008G028200.1	95.1	GOBAR_AA02374
					Gorai.013G086000.2	Gorai.008G028200.1	95.99	GOBAR_DD00255
	57 G. arboretum gene	Similarity/(one to one)	57 G. barbadense gene		Gorai.013G098500.1	Gorai.008G055100.1	99.18	GOBAR_AA08153
	Cotton_A_00058	97.85	GOBAR_AA28654		Gorai.013G131400.1	Gorai.008G055100.1	97.39	GOBAR_DD34053
	Cotton_A_00096	98.11	GOBAR_AA34559			Gorai.008G067300.1	98.14	GOBAR_AA12245
	Cotton_A_00501	98.75	GOBAR_AA28167			Gorai.008G067300.1	98.71	GOBAR_DD00789
	Cotton_A_01226	94.44	GOBAR_AA16455			Gorai.008G073100.1	97.44	GOBAR_AA30065
	Cotton_A_01429	99.48	GOBAR_AA20943			Gorai.008G073100.1	92.62	GOBAR_DD02429
	Cotton_A_02968	99.07	GOBAR_AA26382			Gorai.008G205900.1	99.15	GOBAR_DD06747
	Cotton_A_03411	99.22	GOBAR_AA38340			Gorai.008G205900.1	99.15	GOBAR_DD37886
	Cotton_A_03702	99.18	GOBAR_AA09700			Gorai.008G210900.2	94.39	GOBAR_AA22545
	Cotton_A_03759	99.44	GOBAR_AA38069			Gorai.008G210900.2	98.7	GOBAR_DD10094
	Cotton_A_04410	99.31	GOBAR_AA36568			Gorai.008G269700.1	100	GOBAR_AA24739
	Cotton_A_04493	94.91	GOBAR_AA32865			Gorai.008G269700.1	96.74	GOBAR_DD10882
	Cotton_A_05775	98.94	GOBAR_AA33689			Gorai.008G289000.1	95.41	GOBAR_DD18779
	Cotton_A_07524	99.05	GOBAR_AA02841			Gorai.008G289000.1	95.41	GOBAR_DD37372
	Cotton_A_07793	99.49	GOBAR_DD36365			Gorai.009G057300.1	91.59	GOBAR_DD23854
	Cotton_A_08048	99.29	GOBAR_AA16579			Gorai.009G057300.1	98.2	GOBAR_DD37403
	Cotton_A_09458	99.02	GOBAR_AA20521			Gorai.009G092600.1	98.37	GOBAR_DD15599
	Cotton_A_09575	99.67	GOBAR_AA15870			Gorai.009G092600.1	98.5	GOBAR_DD37880
	Cotton_A_09744	99.6	GOBAR_AA02422			Gorai.009G198200.1	80.22	GOBAR_DD04717
	Cotton_A_11411	99.25	GOBAR_AA22792			Gorai.009G198200.1	99.54	GOBAR_DD21204
	Cotton_A_12931	99.86	GOBAR_AA23966			Gorai.009G198200.3	97.78	GOBAR_AA23986
	Cotton_A_13417	95.18	GOBAR_AA24276			Gorai.009G198200.3	80.22	GOBAR_DD04717
	Cotton_A_15473	99.35	GOBAR_AA38953			Gorai.010G153300.1	97.3	GOBAR_AA13100
	Cotton_A_15541	98.46	GOBAR_AA38674			Gorai.010G153300.1	98.99	GOBAR_DD13959
	Cotton_A_15955	98.43	GOBAR_AA17793			Gorai.010G224300.1	93.74	GOBAR_DD11714
	Cotton_A_16896	99.47	GOBAR_AA39257			Gorai.010G224300.1	96.79	GOBAR_DD38242
	Cotton_A_17392	78.59	GOBAR_AA22083			Gorai.013G228400.1	97.95	GOBAR_AA14095
	Cotton_A_17523	98.91	GOBAR_AA30383			Gorai.013G228400.1	98.9	GOBAR_DD17011
	Cotton_A_17617	99.05	GOBAR_AA05746
	Cotton_A_17704	98.85	GOBAR_AA33487
	Cotton_A_17735	99.15	GOBAR_AA24740			60 G. raimondii gene	Similarity/(one to one)	60 G. barbadense gene
	Cotton_A_17776	99.46	GOBAR_AA11285			Gorai.001G040600.1	82.07	GOBAR_DD15895
	Cotton_A_18858	99.54	GOBAR_AA25278			Gorai.001G138400.1	98.83	GOBAR_DD35880
	Cotton_A_20263	94.44	GOBAR_AA09751			Gorai.001G191900.1	95.89	GOBAR_DD09943
	Cotton_A_20564	99.39	GOBAR_AA00732			Gorai.001G240800.1	97.5	GOBAR_DD20764
	Cotton_A_22374	99.12	GOBAR_AA11791			Gorai.002G016600.1	92.95	GOBAR_DD04999
	Cotton_A_22853	98.59	GOBAR_AA25847			Gorai.002G020900.1	98.92	GOBAR_DD24064
	Cotton_A_23711	81.77	GOBAR_AA21892			Gorai.002G032400.1	98.07	GOBAR_AA25897
	Cotton_A_24301	99.43	GOBAR_AA25515			Gorai.002G120300.1	96.78	GOBAR_DD11066
	Cotton_A_25415	91.1	GOBAR_AA34679			Gorai.002G120600.1	75.77	GOBAR_AA16151
	Cotton_A_25992	96.44	GOBAR_AA13813			Gorai.002G200700.1	99.13	GOBAR_DD13440
	Cotton_A_28020	99.86	GOBAR_AA17450			Gorai.002G240300.1	98.86	GOBAR_DD16403
	Cotton_A_28557	96.67	GOBAR_AA16153			Gorai.004G038400.1	99.5	GOBAR_DD28118
	Cotton_A_29248	95.39	GOBAR_AA32302			Gorai.004G076500.1	99.59	GOBAR_DD19527
	Cotton_A_30003	99.38	GOBAR_AA04161			Gorai.004G181600.1	99.34	GOBAR_DD19314
	Cotton_A_30439	97.33	GOBAR_AA04344			Gorai.004G194300.1	96.47	GOBAR_DD29858
	Cotton_A_30897	94.22	GOBAR_AA12387			Gorai.004G235300.1	91.19	GOBAR_DD03089
	Cotton_A_32227	99.51	GOBAR_AA15945			Gorai.005G053800.1	98.5	GOBAR_DD26018
	Cotton_A_32339	99	GOBAR_AA29215			Gorai.005G136900.1	99.37	GOBAR_DD24355
	Cotton_A_32575	94.29	GOBAR_AA02650			Gorai.005G192500.1	98.84	GOBAR_DD19796
	Cotton_A_34884	99.47	GOBAR_AA29843			Gorai.005G192500.2	98.84	GOBAR_DD19796
	Cotton_A_34976	99.04	GOBAR_AA11572			Gorai.006G003200.1	98.18	GOBAR_DD24456
	Cotton_A_35950	98.49	GOBAR_AA28237			Gorai.006G094600.1	94.43	GOBAR_DD30523
	Cotton_A_36351	99.55	GOBAR_AA00296			Gorai.006G137700.1	97.06	GOBAR_DD34428
	Cotton_A_36910	99.68	GOBAR_AA18315			Gorai.006G154800.1	97.29	GOBAR_DD06946
	Cotton_A_37555	99.58	GOBAR_AA05324			Gorai.006G199900.1	98.96	GOBAR_DD32180
	Cotton_A_37726	98.81	GOBAR_AA11811			Gorai.006G243300.1	98.86	GOBAR_DD20453
	Cotton_A_37812	96.6	GOBAR_AA08048			Gorai.006G267000.1	96.4	GOBAR_AA31790
						Gorai.007G079800.2	99.29	GOBAR_DD15244
						Gorai.007G096200.1	92.42	GOBAR_DD13013
						Gorai.007G149300.1	98.95	GOBAR_DD03135
						Gorai.007G152300.1	99.38	GOBAR_DD10574
						Gorai.007G160800.1	97.32	GOBAR_DD15406
						Gorai.007G344400.1	94.9	GOBAR_DD33910
						Gorai.008G048000.1	99.01	GOBAR_DD10316
						Gorai.008G050500.1	97.8	GOBAR_DD06036
						Gorai.008G050500.2	97.8	GOBAR_DD06036
						Gorai.008G050500.3	97.8	GOBAR_DD06036
						Gorai.008G059500.1	99.54	GOBAR_DD34817
						Gorai.008G079500.1	99.04	GOBAR_DD04482
						Gorai.008G102200.1	98.72	GOBAR_DD04982
						Gorai.008G156300.1	98.84	GOBAR_DD08185
						Gorai.008G210900.1	94.39	GOBAR_AA22545
						Gorai.009G009600.1	99.75	GOBAR_DD32649
						Gorai.009G072800.1	99.06	GOBAR_DD20705
						Gorai.009G198200.2	80.22	GOBAR_DD04717
						Gorai.009G451200.1	98.7	GOBAR_DD06176
						Gorai.010G032300.1	87.4	GOBAR_DD13595
						Gorai.010G075400.1	92.37	GOBAR_DD18750
						Gorai.010G158200.1	88.56	GOBAR_DD03254
						Gorai.010G214600.1	99.43	GOBAR_DD19584
						Gorai.011G038100.1	99.31	GOBAR_DD29525
						Gorai.011G165700.1	92.02	GOBAR_DD27125
						Gorai.012G021300.1	98.95	GOBAR_DD15801
						Gorai.012G121600.1	99.51	GOBAR_DD08834
						Gorai.012G138600.1	99.07	GOBAR_DD26562
						Gorai.012G146600.1	90.75	GOBAR_DD31520
						Gorai.013G086000.1	93.1	GOBAR_DD06715
						Gorai.013G142700.1	99.36	GOBAR_DD11547
						Gorai.013G158100.1	98.07	GOBAR_DD09400
						Gorai.013G198600.1	98.11	GOBAR_DD06602
